# Supplementary material
Source: publisher figshare collection journal article supplement (https://diabetesjournals.figshare.com/ndownloader/files/29066724)
Supplement: Supplementary file 1 [file 29066724]

## Sheet: Downregulated Genes
geneID	geneSymbol	baseMean	log2FoldChange	lfcSE	pvalue	padj	FC	flag
ENSMUSG00000047507.12	Baiap3	3179.73	-2.43316	0.159183	5.47e-54	3.13e-50	-5.40076	1
ENSMUSG00000027690.13	Slc2a2	11475.6	-3.45007	0.234212	1.54e-50	6.61e-47	-10.9288	1
ENSMUSG00000079620.13	Muc4	1325.33	-4.22896	0.292348	1.1e-48	3.79e-45	-18.7519	1
ENSMUSG00000018569.12	Cldn7	547.438	-4.02676	0.28081	7.7e-48	2.2e-44	-16.2996	1
ENSMUSG00000074207.10	Adh1	1332.48	-4.48937	0.340209	4.24e-41	1.04e-37	-22.4612	1
ENSMUSG00000027524.9	Edn3	344.637	-4.39614	0.337945	4.65e-40	9.96e-37	-21.0558	1
ENSMUSG00000044453.5	Ffar1	1896.27	-2.7458	0.221097	1.21e-36	2.07e-33	-6.70761	1
ENSMUSG00000046593.3	Tmem215	3486.65	-1.99647	0.167715	7.18e-34	1.03e-30	-3.99021	1
ENSMUSG00000043719.14	Col6a6	1595.51	-3.00228	0.260248	4.98e-32	5.69e-29	-8.01264	1
ENSMUSG00000044550.11	Tceal3	856.483	-2.5499	0.223892	2.9e-31	3.11e-28	-5.85595	1
ENSMUSG00000035000.8	Dpp4	1709.46	-1.92817	0.170645	8.75e-31	8.83e-28	-3.80572	1
ENSMUSG00000036856.4	Wnt4	2582.42	-2.89574	0.256982	1.01e-30	9.19e-28	-7.44227	1
ENSMUSG00000020734.13	Grin2c	324.666	-2.3083	0.206332	2.55e-30	2.19e-27	-4.95297	1
ENSMUSG00000047501.3	Cldn4	1424.59	-2.72674	0.244969	5.21e-30	4.25e-27	-6.61959	1
ENSMUSG00000032890.17	Rims3	2445.91	-1.96151	0.178649	2.96e-29	2.21e-26	-3.89469	1
ENSMUSG00000096146.2	Kcnj11	2126.88	-2.42914	0.223482	8.67e-29	6.2e-26	-5.38572	1
ENSMUSG00000034127.15	Tspan8	983.553	-1.9255	0.177294	1.2e-28	8.23e-26	-3.7987	1
ENSMUSG00000024013.15	Fgd2	637.793	-2.45354	0.227845	2.61e-28	1.72e-25	-5.47758	1
ENSMUSG00000024411.11	Aqp4	466.008	-2.7177	0.255265	1.18e-27	7.23e-25	-6.57823	1
ENSMUSG00000043088.16	Il17re	175.55	-3.16957	0.30047	2.44e-27	1.44e-24	-8.9978	1
ENSMUSG00000096847.2	Tmem151b	151.019	-3.1227	0.297573	6.18e-27	3.53e-24	-8.71017	1
ENSMUSG00000025504.14	Eps8l2	894.91	-2.04049	0.19848	5.67e-26	3.14e-23	-4.11385	1
ENSMUSG00000018470.8	Kcnab3	232.815	-2.60003	0.253549	7.45e-26	3.99e-23	-6.06301	1
ENSMUSG00000003559.8	As3mt	786.74	-1.93999	0.189485	8.42e-26	4.38e-23	-3.83704	1
ENSMUSG00000067786.16	Nnat	1527.98	-3.38837	0.332208	8.88e-26	4.48e-23	-10.4713	1
ENSMUSG00000078588.10	Ccdc24	92.8844	-4.26088	0.427711	5.55e-25	2.72e-22	-19.1714	1
ENSMUSG00000028749.7	Pla2g2f	3077.19	-1.88557	0.188332	8.72e-25	4.04e-22	-3.69499	1
ENSMUSG00000042377.8	Fam83g	277.615	-3.1491	0.314904	8.7e-25	4.04e-22	-8.871	1
ENSMUSG00000018822.7	Sfrp5	919.799	-2.05523	0.206993	1.99e-24	8.99e-22	-4.1561	1
ENSMUSG00000078945.10	Naip2	683.669	-1.7647	0.180481	9.51e-24	4.18e-21	-3.39804	1
ENSMUSG00000106139.1	Gm30648	584.757	-1.86137	0.190923	1.31e-23	5.61e-21	-3.63354	1
ENSMUSG00000074892.9	B3galt5	766.753	-1.93426	0.198674	1.46e-23	6.11e-21	-3.82182	1
ENSMUSG00000039661.14	Dusp26	533.063	-2.86981	0.296128	1.81e-23	7.21e-21	-7.30969	1
ENSMUSG00000022315.3	Slc30a8	15587	-1.706	0.175793	1.95e-23	7.44e-21	-3.26256	1
ENSMUSG00000033061.15	Resp18	12619.9	-1.98247	0.205678	3.41e-23	1.27e-20	-3.9517	1
ENSMUSG00000032875.8	Arhgef17	2638.15	-1.79664	0.188002	8.17e-23	2.98e-20	-3.47411	1
ENSMUSG00000061126.5	Cyp4f39	261.188	-2.74715	0.288136	8.9e-23	3.18e-20	-6.71389	1
ENSMUSG00000067242.11	Lgi1	625.17	-2.79308	0.295458	1.85e-22	6.46e-20	-6.9311	1
ENSMUSG00000042529.14	Kcnj12	231.458	-2.14734	0.22797	3.2e-22	1.07e-19	-4.4301	1
ENSMUSG00000042129.8	Rassf4	722.322	-1.58745	0.172002	1.94e-21	6.28e-19	-3.00517	1
ENSMUSG00000034156.16	Tspoap1	159.471	-2.38589	0.262059	5.28e-21	1.68e-18	-5.22667	1
ENSMUSG00000026442.14	Nfasc	1942.61	-1.53934	0.168753	5.4e-21	1.68e-18	-2.90661	1
ENSMUSG00000034785.14	Dio1	1388.46	-1.97618	0.218071	7.83e-21	2.4e-18	-3.9345	1
ENSMUSG00000024990.13	Rbp4	3483.36	-1.56638	0.1729	9.58e-21	2.83e-18	-2.9616	1
ENSMUSG00000104283.1	Gm37459	344.325	-2.88465	0.321484	1.28e-20	3.72e-18	-7.38528	1
ENSMUSG00000026303.6	Mlph	143.355	-4.29436	0.48086	3.19e-20	8.97e-18	-19.6215	1
ENSMUSG00000002266.17	Zim1	2077.46	-2.32328	0.26178	3.9e-20	1.06e-17	-5.00468	1
ENSMUSG00000026834.13	Acvr1c	261.075	-2.05794	0.233668	6.62e-20	1.69e-17	-4.16391	1
ENSMUSG00000023906.3	Cldn6	159.226	-2.70363	0.308193	1.06e-19	2.68e-17	-6.51441	1
ENSMUSG00000050071.8	Bex1	699.559	-1.98395	0.226703	1.3e-19	3.24e-17	-3.95574	1
ENSMUSG00000038539.15	Atf5	1110.83	-2.00468	0.230178	1.98e-19	4.84e-17	-4.01299	1
ENSMUSG00000025127.15	Gcgr	312.223	-3.98645	0.462004	2.07e-19	5.01e-17	-15.8504	1
ENSMUSG00000020732.13	Rab37	2527.06	-1.81358	0.209639	3.32e-19	7.9e-17	-3.51514	1
ENSMUSG00000037185.9	Krt80	142.564	-2.7414	0.318546	4.1e-19	9.63e-17	-6.6872	1
ENSMUSG00000011382.8	Dhdh	390.237	-1.96448	0.230748	1.16e-18	2.69e-16	-3.90273	1
ENSMUSG00000070473.4	Cldn3	285.691	-2.21639	0.264107	2.9e-18	6.55e-16	-4.64731	1
ENSMUSG00000092570.7	Plut	212.628	-2.64416	0.32059	7.74e-18	1.7e-15	-6.25131	1
ENSMUSG00000015405.15	Ace2	1354.02	-1.50581	0.182558	1.25e-17	2.67e-15	-2.83985	1
ENSMUSG00000039671.18	Zmynd8	2232.08	-1.45181	0.176425	1.46e-17	3.09e-15	-2.7355	1
ENSMUSG00000090035.3	Galnt4	665.206	-1.83562	0.225917	3.06e-17	6.4e-15	-3.56925	1
ENSMUSG00000001986.16	Gria3	746.62	-1.40726	0.173551	4.18e-17	8.52e-15	-2.65233	1
ENSMUSG00000041117.8	Ccdc8	218.307	-2.64127	0.327466	4.15e-17	8.52e-15	-6.23882	1
ENSMUSG00000022129.4	Dct	127.803	-2.21011	0.273828	4.24e-17	8.55e-15	-4.6271	1
ENSMUSG00000055897.13	Ppp4r1l-ps	1199.38	-1.28353	0.159302	6.86e-17	1.34e-14	-2.43433	1
ENSMUSG00000051209.3	Gpr119	504.956	-3.17949	0.401059	9.95e-17	1.89e-14	-9.05987	1
ENSMUSG00000019987.9	Arg1	876.381	-1.65185	0.207689	1.24e-16	2.33e-14	-3.14236	1
ENSMUSG00000109814.1	Gm45847	168.462	-4.05481	0.515571	1.89e-16	3.53e-14	-16.6196	1
ENSMUSG00000063681.14	Crb1	111.351	-2.42823	0.310285	2.7e-16	4.97e-14	-5.38231	1
ENSMUSG00000019429.7	Ffar3	188.865	-2.74172	0.349895	2.77e-16	4.99e-14	-6.68866	1
ENSMUSG00000042258.13	Isl1	3506.53	-1.15315	0.145944	2.76e-16	4.99e-14	-2.22399	1
ENSMUSG00000050737.13	Ptges	126.576	-3.22201	0.41321	3.31e-16	5.92e-14	-9.33083	1
ENSMUSG00000063919.11	Srrm4	125.553	-2.49236	0.323981	6.47e-16	1.12e-13	-5.62698	1
ENSMUSG00000060224.4	Pyroxd2	150.693	-2.1937	0.285994	9.85e-16	1.67e-13	-4.57478	1
ENSMUSG00000016256.10	Ctsz	978.775	-1.31496	0.171477	1.52e-15	2.55e-13	-2.48795	1
ENSMUSG00000075592.10	Nynrin	510.507	-1.93711	0.254778	1.88e-15	3.14e-13	-3.82938	1
ENSMUSG00000060314.13	Zfp941	189.863	-1.85838	0.246423	2.78e-15	4.59e-13	-3.62601	1
ENSMUSG00000019577.6	Pdk4	825.994	-2.07369	0.276	3.6e-15	5.82e-13	-4.20961	1
ENSMUSG00000034871.2	Fam151a	4076.08	-1.62297	0.215883	3.84e-15	6.1e-13	-3.08009	1
ENSMUSG00000017316.13	Ppy	48988	-2.32328	0.310928	4.36e-15	6.85e-13	-5.00468	1
ENSMUSG00000063011.7	Msln	1652.33	-1.86944	0.251382	6.17e-15	9.44e-13	-3.65391	1
ENSMUSG00000048385.9	Scrt1	52.8791	-4.40884	0.591616	6.52e-15	9.81e-13	-21.2418	1
ENSMUSG00000004791.7	Pgf	366.939	-1.60945	0.217855	1.06e-14	1.57e-12	-3.05136	1
ENSMUSG00000069008.3	Gm5537	67.0397	-10.4645	2.98677	1.19e-14	1.74e-12	-1412.93	1
ENSMUSG00000024766.15	Lipo3	611.739	-1.33822	0.181001	1.24e-14	1.8e-12	-2.5284	1
ENSMUSG00000041261.9	Car8	685.23	-1.52234	0.206485	1.26e-14	1.82e-12	-2.87257	1
ENSMUSG00000069920.10	B3gnt9	278.611	-1.7642	0.23984	1.27e-14	1.82e-12	-3.39687	1
ENSMUSG00000042429.8	Adora1	560.678	-1.67975	0.228899	1.49e-14	2.09e-12	-3.20373	1
ENSMUSG00000073000.3	Gm10451	148.49	-2.08707	0.286032	1.64e-14	2.29e-12	-4.24886	1
ENSMUSG00000096956.2	Snhg18	137.738	-2.22112	0.303815	1.77e-14	2.44e-12	-4.66255	1
ENSMUSG00000052595.8	A1cf	429.773	-1.47253	0.201123	1.94e-14	2.67e-12	-2.77508	1
ENSMUSG00000022577.17	Ly6h	69.3721	-3.29579	0.457563	2.52e-14	3.41e-12	-9.82044	1
ENSMUSG00000039529.9	Atp8b1	4322.48	-1.08908	0.148858	2.75e-14	3.68e-12	-2.12738	1
ENSMUSG00000030909.6	Anks4b	602.268	-1.96744	0.273937	4.23e-14	5.62e-12	-3.91073	1
ENSMUSG00000026432.7	Avpr1b	143.249	-2.57409	0.359145	4.63e-14	6.06e-12	-5.95497	1
ENSMUSG00000099413.1	Gm17767	320.16	-2.29833	0.320779	4.9e-14	6.37e-12	-4.91888	1
ENSMUSG00000041642.18	Kif21b	91.3428	-2.94986	0.417633	7.22e-14	9.18e-12	-7.72676	1
ENSMUSG00000028841.14	Cnksr1	159.343	-1.82321	0.25674	8.35e-14	1.04e-11	-3.53869	1
ENSMUSG00000042655.5	Shisal2b	472.385	-1.81109	0.255904	9.09e-14	1.13e-11	-3.50908	1
ENSMUSG00000070498.3	Tmem132b	1106.81	-1.70311	0.240285	9.27e-14	1.14e-11	-3.25601	1
ENSMUSG00000024553.8	Galr1	684.872	-1.29997	0.183234	1.15e-13	1.4e-11	-2.46224	1
ENSMUSG00000025188.15	Hps1	370.272	-1.72822	0.24562	1.22e-13	1.48e-11	-3.31318	1
ENSMUSG00000016552.13	Foxred2	642.548	-1.42961	0.202505	1.32e-13	1.59e-11	-2.69373	1
ENSMUSG00000022941.8	Ripply3	589.449	-1.60697	0.228883	1.5e-13	1.8e-11	-3.04611	1
ENSMUSG00000033316.14	Galnt9	76.4121	-3.36521	0.483202	1.51e-13	1.8e-11	-10.3046	1
ENSMUSG00000051579.10	Tceal8	1146.52	-1.19823	0.17033	1.9e-13	2.24e-11	-2.29457	1
ENSMUSG00000032091.15	Tmprss4	734.477	-1.32287	0.189992	2.81e-13	3.3e-11	-2.50164	1
ENSMUSG00000044988.7	Ucn3	5909.96	-1.55058	0.224284	3.32e-13	3.84e-11	-2.92936	1
ENSMUSG00000030873.9	Scnn1b	2341.82	-1.53804	0.222899	3.62e-13	4.16e-11	-2.90399	1
ENSMUSG00000002059.18	Rab34	227.224	-2.06594	0.301471	3.78e-13	4.32e-11	-4.18705	1
ENSMUSG00000034435.6	Tmem30b	449.83	-1.90134	0.277445	4.74e-13	5.35e-11	-3.73559	1
ENSMUSG00000030287.15	Itpr2	617.543	-2.01062	0.295003	5.47e-13	6.09e-11	-4.02956	1
ENSMUSG00000033740.17	St18	2960.71	-1.29338	0.188636	5.87e-13	6.45e-11	-2.45102	1
ENSMUSG00000033707.9	Lrrc24	159.43	-2.44028	0.360379	6.2e-13	6.77e-11	-5.42746	1
ENSMUSG00000057246.16	BC051142	120.31	-2.65052	0.393223	6.59e-13	7.15e-11	-6.27893	1
ENSMUSG00000028957.12	Per3	1057.16	-1.34049	0.196892	8.14e-13	8.78e-11	-2.53238	1
ENSMUSG00000044788.10	Fads6	678.843	-1.1849	0.173849	8.79e-13	9.42e-11	-2.27348	1
ENSMUSG00000073530.11	Pappa2	7955.54	-1.737	0.256778	9.99e-13	1.05e-10	-3.33341	1
ENSMUSG00000021679.4	S100z	69.0056	-3.06851	0.458271	1.04e-12	1.09e-10	-8.38906	1
ENSMUSG00000099908.1	Gm28539	44.1031	-9.74202	2.91142	1.26e-12	1.31e-10	-856.329	1
ENSMUSG00000051527.11	Usp29	849.591	-1.27062	0.188459	1.4e-12	1.45e-10	-2.41265	1
ENSMUSG00000039062.15	Anpep	2066.64	-2.13517	0.3215	1.67e-12	1.7e-10	-4.3929	1
ENSMUSG00000048218.6	Amigo2	1806.31	-1.35916	0.203516	1.98e-12	2.01e-10	-2.56536	1
ENSMUSG00000038296.14	Galnt18	897.003	-1.67338	0.252438	2.19e-12	2.2e-10	-3.18961	1
ENSMUSG00000049112.9	Oxtr	511.819	-2.4358	0.369582	2.3e-12	2.28e-10	-5.41065	1
ENSMUSG00000025194.5	Abcc2	45.9276	-3.49933	0.526861	2.32e-12	2.29e-10	-11.3085	1
ENSMUSG00000029419.8	Ajm1	97.2607	-2.02753	0.307447	2.61e-12	2.56e-10	-4.07706	1
ENSMUSG00000059555.6	Tor4a	313.245	-2.02855	0.308231	2.75e-12	2.68e-10	-4.07995	1
ENSMUSG00000027315.13	Spint1	2222.22	-1.22309	0.184332	2.86e-12	2.77e-10	-2.33447	1
ENSMUSG00000004347.17	Pde1c	501.929	-1.40982	0.213369	2.98e-12	2.87e-10	-2.65704	1
ENSMUSG00000096215.8	Smim22	282.568	-1.49036	0.226186	3.12e-12	2.99e-10	-2.8096	1
ENSMUSG00000067219.9	Nipal1	1762.51	-1.25243	0.189422	3.35e-12	3.19e-10	-2.38243	1
ENSMUSG00000000159.16	Igsf5	169.81	-1.57394	0.239404	3.58e-12	3.39e-10	-2.97718	1
ENSMUSG00000008601.12	Rab25	507.426	-1.42212	0.216489	3.76e-12	3.54e-10	-2.6798	1
ENSMUSG00000033685.13	Ucp2	4988.84	-1.41339	0.214962	3.79e-12	3.55e-10	-2.66362	1
ENSMUSG00000118356.1	Gm50353	109.897	-2.32451	0.356648	3.81e-12	3.55e-10	-5.00896	1
ENSMUSG00000067889.6	Sptbn2	1208.16	-1.4508	0.221281	4.1e-12	3.78e-10	-2.7336	1
ENSMUSG00000025586.17	Cpeb1	1431.41	-1.1382	0.172634	4.21e-12	3.86e-10	-2.20106	1
ENSMUSG00000024027.8	Glp1r	9291.95	-1.80091	0.276948	4.91e-12	4.48e-10	-3.4844	1
ENSMUSG00000030319.8	Cand2	466.301	-1.60328	0.246839	5.93e-12	5.38e-10	-3.03833	1
ENSMUSG00000012350.15	Ehf	224.59	-1.6973	0.260733	5.96e-12	5.38e-10	-3.24295	1
ENSMUSG00000033488.11	Cryzl2	251.392	-1.84543	0.286925	7.81e-12	7.01e-10	-3.59359	1
ENSMUSG00000062031.13	Pgghg	507.841	-1.22265	0.190356	1.19e-11	1.05e-09	-2.33375	1
ENSMUSG00000033849.3	B3galt2	245.152	-1.31205	0.205122	1.35e-11	1.18e-09	-2.48294	1
ENSMUSG00000009246.14	Trpm5	1824.18	-2.09953	0.332152	1.49e-11	1.3e-09	-4.28569	1
ENSMUSG00000072675.12	Duxbl2	54.3405	-3.47387	0.543674	1.76e-11	1.52e-09	-11.1107	1
ENSMUSG00000000216.8	Scnn1g	154.923	-2.63006	0.419062	1.82e-11	1.57e-09	-6.19051	1
ENSMUSG00000089996.6	Tmsb15b2	2688.47	-1.20826	0.190059	1.86e-11	1.6e-09	-2.31059	1
ENSMUSG00000050908.12	Tvp23a	138.809	-1.85474	0.295	2.08e-11	1.77e-09	-3.61686	1
ENSMUSG00000026175.12	Vil1	1910.88	-1.26962	0.200979	2.32e-11	1.97e-09	-2.41097	1
ENSMUSG00000054256.11	Msi1	198.309	-1.38909	0.221838	3.15e-11	2.65e-09	-2.61913	1
ENSMUSG00000024197.10	Plin3	184.466	-1.7309	0.278733	3.49e-11	2.91e-09	-3.31934	1
ENSMUSG00000029007.8	Agtrap	712.436	-1.48303	0.240019	4.68e-11	3.87e-09	-2.79536	1
ENSMUSG00000001583.13	Tnk1	306.49	-1.63211	0.265074	4.77e-11	3.94e-09	-3.09966	1
ENSMUSG00000036687.13	Tmem184a	1307.59	-1.33729	0.216115	4.9e-11	4.02e-09	-2.52676	1
ENSMUSG00000018474.18	Chd3	3857.59	-0.900644	0.144556	6.39e-11	5.16e-09	-1.8669	1
ENSMUSG00000056812.14	St8sia3	718.632	-1.66013	0.271585	6.74e-11	5.42e-09	-3.16045	1
ENSMUSG00000040811.15	Eml2	805.841	-1.14587	0.186113	7.13e-11	5.71e-09	-2.2128	1
ENSMUSG00000002324.8	Rec8	305.478	-1.98682	0.328279	8.02e-11	6.37e-09	-3.96362	1
ENSMUSG00000019866.15	Crybg1	282.942	-1.28693	0.210117	8.01e-11	6.37e-09	-2.44009	1
ENSMUSG00000031845.15	Bco1	122.484	-2.18841	0.362713	1.08e-10	8.47e-09	-4.55804	1
ENSMUSG00000035694.15	Caps2	87.1299	-2.45663	0.41325	1.21e-10	9.42e-09	-5.48934	1
ENSMUSG00000019066.13	Rab3d	2977.91	-1.15875	0.190872	1.22e-10	9.5e-09	-2.23264	1
ENSMUSG00000032852.3	Rspo4	291.981	-1.99764	0.333914	1.3e-10	1.01e-08	-3.99347	1
ENSMUSG00000019368.13	Sec14l4	78.7693	-1.99967	0.333834	1.32e-10	1.01e-08	-3.99908	1
ENSMUSG00000041605.16	Inava	89.3812	-2.38	0.398213	1.32e-10	1.01e-08	-5.20537	1
ENSMUSG00000024940.11	Ltbp3	1373.37	-1.29268	0.215206	1.59e-10	1.21e-08	-2.44983	1
ENSMUSG00000062044.16	Lmtk3	432.473	-1.62492	0.272358	1.6e-10	1.21e-08	-3.08424	1
ENSMUSG00000047040.9	Prr15l	229.255	-1.69641	0.284459	1.65e-10	1.24e-08	-3.24094	1
ENSMUSG00000021703.9	Serinc5	1174.65	-1.15851	0.193247	1.97e-10	1.47e-08	-2.23227	1
ENSMUSG00000017311.15	Pyy	33242.1	-1.38536	0.234751	3.13e-10	2.29e-08	-2.61237	1
ENSMUSG00000118366.1	9130016M20Rik	242.367	-1.33503	0.226473	3.17e-10	2.31e-08	-2.52281	1
ENSMUSG00000028661.8	Epha8	40.7369	-3.57964	0.609922	3.69e-10	2.68e-08	-11.9558	1
ENSMUSG00000028064.17	Sema4a	284.941	-1.7785	0.306088	3.84e-10	2.77e-08	-3.4307	1
ENSMUSG00000052889.11	Prkcb	1422.66	-1.24663	0.2127	4.06e-10	2.91e-08	-2.37287	1
ENSMUSG00000024386.9	Proc	48.4627	-2.39709	0.413707	4.43e-10	3.15e-08	-5.2674	1
ENSMUSG00000023070.6	Rgn	44.3556	-2.84997	0.49641	4.75e-10	3.33e-08	-7.20984	1
ENSMUSG00000097328.7	Tnfsf12	199.437	-1.93169	0.335131	4.74e-10	3.33e-08	-3.81502	1
ENSMUSG00000046794.9	Ppp1r3b	73.437	-2.66473	0.460823	4.86e-10	3.4e-08	-6.34106	1
ENSMUSG00000023036.14	Pcdhgc4	604.603	-1.88039	0.326265	4.91e-10	3.42e-08	-3.68174	1
ENSMUSG00000058586.12	Serhl	190.053	-1.63483	0.283075	5.06e-10	3.51e-08	-3.10551	1
ENSMUSG00000110803.1	Gm20275	40.0589	-2.70079	0.468312	5.4e-10	3.71e-08	-6.50158	1
ENSMUSG00000109715.1	Gm45606	280.486	-1.85293	0.322102	5.44e-10	3.73e-08	-3.61232	1
ENSMUSG00000036353.13	P2ry12	104.204	-1.9382	0.337353	5.95e-10	4.06e-08	-3.83228	1
ENSMUSG00000035852.11	Misp	105.504	-1.72734	0.301571	6.54e-10	4.45e-08	-3.31118	1
ENSMUSG00000030281.16	Il17rc	244.431	-1.31042	0.227332	6.6e-10	4.47e-08	-2.48013	1
ENSMUSG00000027547.17	Sall4	96.1044	-3.12549	0.553516	7.13e-10	4.79e-08	-8.72704	1
ENSMUSG00000092500.1	Gm20400	92.8644	-1.89743	0.333313	7.43e-10	4.98e-08	-3.7255	1
ENSMUSG00000033022.8	Cdo1	163.694	-1.5823	0.276547	7.64e-10	5.07e-08	-2.99446	1
ENSMUSG00000074277.4	Phldb3	60.9769	-2.11543	0.373566	9.2e-10	6.04e-08	-4.33318	1
ENSMUSG00000063895.7	Nupl1	38.7257	-2.77694	0.488348	9.4e-10	6.15e-08	-6.85396	1
ENSMUSG00000027522.15	Stx16	895.802	-1.2764	0.223975	9.9e-10	6.46e-08	-2.42234	1
ENSMUSG00000019944.14	Rhobtb1	1066.64	-1.56413	0.277028	1.1e-09	7.17e-08	-2.95699	1
ENSMUSG00000042514.11	Klhl14	31.6475	-4.40072	0.77394	1.18e-09	7.59e-08	-21.1226	1
ENSMUSG00000044933.3	Sstr3	4068.56	-1.47585	0.261793	1.24e-09	7.94e-08	-2.78148	1
ENSMUSG00000036834.16	Plch1	643.301	-0.95208	0.166983	1.36e-09	8.72e-08	-1.93466	1
ENSMUSG00000005514.14	Por	3218.62	-1.0092	0.177206	1.4e-09	8.94e-08	-2.0128	1
ENSMUSG00000029656.13	C8b	1242.87	-1.03131	0.181296	1.43e-09	9.07e-08	-2.04388	1
ENSMUSG00000041351.16	Rap1gap	1177.14	-1.04076	0.1833	1.47e-09	9.25e-08	-2.05731	1
ENSMUSG00000084839.1	Gm14097	52.3157	-2.35851	0.424333	1.54e-09	9.67e-08	-5.12841	1
ENSMUSG00000015401.12	Cltrn	13010.6	-0.781391	0.136225	1.65e-09	1.03e-07	-1.71879	1
ENSMUSG00000074715.3	Ccl28	443.237	-1.2858	0.229584	1.75e-09	1.08e-07	-2.43818	1
ENSMUSG00000050357.9	Carmil2	124.931	-1.43823	0.257994	1.9e-09	1.17e-07	-2.70988	1
ENSMUSG00000003070.6	Efna2	80.7195	-2.19024	0.396888	1.91e-09	1.18e-07	-4.56381	1
ENSMUSG00000028541.14	B4galt2	212.591	-1.32463	0.23728	1.94e-09	1.19e-07	-2.50469	1
ENSMUSG00000031791.8	Tmem38a	764.864	-1.04812	0.186398	1.99e-09	1.21e-07	-2.06783	1
ENSMUSG00000086171.7	Pcsk2os1	377.371	-1.43999	0.259015	2.01e-09	1.22e-07	-2.7132	1
ENSMUSG00000030701.17	Plekhb1	415.731	-1.10923	0.197639	2.03e-09	1.23e-07	-2.15731	1
ENSMUSG00000020122.16	Egfr	191.029	-2.03054	0.369613	2.08e-09	1.24e-07	-4.08558	1
ENSMUSG00000029102.9	Hgfac	899.604	-1.2821	0.230831	2.29e-09	1.36e-07	-2.43193	1
ENSMUSG00000033880.11	Lgals3bp	6858.47	-0.940994	0.167262	2.34e-09	1.39e-07	-1.91985	1
ENSMUSG00000029470.15	P2rx4	858.688	-1.12393	0.201849	2.51e-09	1.48e-07	-2.1794	1
ENSMUSG00000052951.5	C130021I20Rik	101.349	-1.76269	0.321401	2.65e-09	1.56e-07	-3.3933	1
ENSMUSG00000002799.6	Jag2	625.958	-0.984212	0.176095	2.71e-09	1.57e-07	-1.97823	1
ENSMUSG00000092274.3	Neat1	5436.11	-2.30959	0.425782	2.71e-09	1.57e-07	-4.95742	1
ENSMUSG00000034949.18	Zfr2	313.677	-1.54211	0.281282	2.74e-09	1.59e-07	-2.9122	1
ENSMUSG00000009731.4	Kcnd1	120.893	-1.79925	0.32855	2.85e-09	1.64e-07	-3.48039	1
ENSMUSG00000025375.15	Aatk	981.053	-1.06712	0.191964	2.88e-09	1.66e-07	-2.09525	1
ENSMUSG00000005087.17	Cd44	620.764	-1.71821	0.312793	3.01e-09	1.72e-07	-3.29029	1
ENSMUSG00000002012.13	Pnck	108.193	-1.87335	0.34486	3.14e-09	1.79e-07	-3.66383	1
ENSMUSG00000038765.13	Lmx1b	188.208	-1.86944	0.345346	3.64e-09	2.04e-07	-3.65392	1
ENSMUSG00000056679.13	Gpr173	91.6185	-1.58376	0.290869	3.64e-09	2.04e-07	-2.9975	1
ENSMUSG00000111977.1	Gm47163	614.369	-1.03878	0.188134	3.65e-09	2.04e-07	-2.05448	1
ENSMUSG00000043621.13	Ubxn10	904.844	-1.24007	0.226278	3.69e-09	2.06e-07	-2.36209	1
ENSMUSG00000047844.3	Bex4	786.761	-0.98414	0.177882	3.68e-09	2.06e-07	-1.97813	1
ENSMUSG00000022453.8	Naga	2762.52	-0.984476	0.177775	3.71e-09	2.06e-07	-1.97859	1
ENSMUSG00000003411.10	Rab3b	621.726	-1.30422	0.238603	3.92e-09	2.17e-07	-2.4695	1
ENSMUSG00000033209.17	Ttc28	1663.51	-1.16463	0.212655	4.08e-09	2.25e-07	-2.24176	1
ENSMUSG00000031803.8	B3gnt3	634.626	-1.11051	0.202327	4.1e-09	2.25e-07	-2.15922	1
ENSMUSG00000086587.7	Gm11837	132.698	-1.52638	0.281385	4.37e-09	2.39e-07	-2.88061	1
ENSMUSG00000099032.2	Tcf24	143.711	-1.98863	0.369758	4.57e-09	2.5e-07	-3.96859	1
ENSMUSG00000022043.19	Trim35	3588.84	-0.941115	0.173298	5.12e-09	2.78e-07	-1.92001	1
ENSMUSG00000057092.12	Fxyd3	278.221	-1.25405	0.231961	5.39e-09	2.9e-07	-2.3851	1
ENSMUSG00000097101.3	1810034E14Rik	124.427	-2.20773	0.418973	5.5e-09	2.95e-07	-4.61947	1
ENSMUSG00000026579.8	F5	130.491	-1.72634	0.321686	5.66e-09	3.02e-07	-3.30886	1
ENSMUSG00000055197.4	Fev	175.713	-1.52845	0.285759	6.41e-09	3.41e-07	-2.88475	1
ENSMUSG00000056895.4	H2bu2	340.854	-2.0294	0.384135	6.72e-09	3.57e-07	-4.08235	1
ENSMUSG00000037306.13	Man1c1	966.027	-1.04518	0.193188	6.87e-09	3.63e-07	-2.06362	1
ENSMUSG00000041945.12	Mfsd9	33.7355	-2.85537	0.535639	7.09e-09	3.74e-07	-7.23691	1
ENSMUSG00000062785.14	Kcnc3	524.257	-1.20555	0.225452	7.94e-09	4.18e-07	-2.30626	1
ENSMUSG00000050473.5	Slc35d3	683.013	-1.01086	0.188113	8.55e-09	4.48e-07	-2.01511	1
ENSMUSG00000019539.11	Rcn3	444.253	-1.34027	0.252693	8.73e-09	4.56e-07	-2.53198	1
ENSMUSG00000034917.8	Tjp3	196.362	-1.64297	0.312878	9.04e-09	4.7e-07	-3.12307	1
ENSMUSG00000058881.13	Zfp516	3617.46	-1.02918	0.192187	9.38e-09	4.86e-07	-2.04086	1
ENSMUSG00000111303.1	4930502A04Rik	34.6556	-2.75467	0.527993	9.77e-09	5.01e-07	-6.74897	1
ENSMUSG00000092286.1	Dtnbos	392.768	-1.79399	0.342732	1e-08	5.13e-07	-3.46772	1
ENSMUSG00000026959.13	Grin1	608.273	-1.44511	0.274416	1.03e-08	5.24e-07	-2.72283	1
ENSMUSG00000031066.10	Usp11	495.561	-1.06952	0.20063	1.04e-08	5.27e-07	-2.09874	1
ENSMUSG00000052512.17	Nav2	2872.4	-0.842435	0.156288	1.05e-08	5.32e-07	-1.79307	1
ENSMUSG00000045589.7	Frrs1l	130.778	-1.53882	0.292704	1.08e-08	5.46e-07	-2.90558	1
ENSMUSG00000054598.13	9130230L23Rik	64.2622	-2.00595	0.383837	1.14e-08	5.74e-07	-4.01652	1
ENSMUSG00000032356.12	Rasgrf1	2792.8	-1.12488	0.212746	1.19e-08	5.98e-07	-2.18083	1
ENSMUSG00000103965.1	Gm30173	145.853	-1.92192	0.370631	1.22e-08	6.11e-07	-3.78927	1
ENSMUSG00000025855.13	Prkar1b	2332.28	-1.01368	0.191214	1.29e-08	6.46e-07	-2.01905	1
ENSMUSG00000084983.7	Gm11789	26.3843	-4.19496	0.80872	1.37e-08	6.83e-07	-18.3151	1
ENSMUSG00000025321.14	Itgb8	444.449	-1.23448	0.235392	1.38e-08	6.86e-07	-2.35297	1
ENSMUSG00000020170.4	Frs2	944.574	-1.01963	0.192892	1.41e-08	6.95e-07	-2.0274	1
ENSMUSG00000017756.9	Slc12a7	2359.63	-1.35328	0.260309	1.46e-08	7.18e-07	-2.55493	1
ENSMUSG00000041608.8	Entpd3	3317.68	-1.25638	0.241054	1.54e-08	7.53e-07	-2.38895	1
ENSMUSG00000028152.10	Tspan5	2563.23	-1.14162	0.218273	1.61e-08	7.81e-07	-2.20629	1
ENSMUSG00000028059.16	Arhgef2	1312.17	-0.842942	0.158695	1.61e-08	7.82e-07	-1.7937	1
ENSMUSG00000054662.8	Ano9	38.9937	-2.63112	0.518009	1.64e-08	7.93e-07	-6.19505	1
ENSMUSG00000116581.1	Gm46565	121.59	-1.373	0.264923	1.66e-08	7.98e-07	-2.59008	1
ENSMUSG00000058135.12	Gstm1	515.429	-1.66108	0.323322	1.82e-08	8.69e-07	-3.16252	1
ENSMUSG00000068263.11	Efcc1	135.068	-1.52205	0.29583	1.82e-08	8.69e-07	-2.87199	1
ENSMUSG00000010505.16	Myt1	1897.33	-1.20956	0.233512	1.94e-08	9.24e-07	-2.31267	1
ENSMUSG00000084902.2	Gm281	129.212	-1.4213	0.276058	1.96e-08	9.3e-07	-2.67827	1
ENSMUSG00000020990.5	Cdkl1	377.952	-1.23887	0.239981	2.08e-08	9.83e-07	-2.36013	1
ENSMUSG00000022176.11	Rem2	169.999	-2.41291	0.476503	2.09e-08	9.86e-07	-5.32547	1
ENSMUSG00000028860.13	Sytl1	280.365	-1.37171	0.267951	2.23e-08	1.04e-06	-2.58778	1
ENSMUSG00000031326.2	Cdx4	24.8815	-3.65489	0.713526	2.22e-08	1.04e-06	-12.596	1
ENSMUSG00000052331.14	Ankrd44	1807.57	-1.14694	0.222209	2.3e-08	1.07e-06	-2.21443	1
ENSMUSG00000068615.4	Gjd2	6715.06	-0.789422	0.1499	2.3e-08	1.07e-06	-1.72838	1
ENSMUSG00000067215.5	Usp51	325.087	-1.42026	0.278191	2.45e-08	1.14e-06	-2.67633	1
ENSMUSG00000067028.11	Cntnap5b	29.8632	-3.07354	0.600945	2.47e-08	1.14e-06	-8.41834	1
ENSMUSG00000027166.14	Dnajc24	759.058	-1.23269	0.24062	2.53e-08	1.17e-06	-2.35005	1
ENSMUSG00000031596.15	Slc7a2	9803.78	-0.968717	0.186808	2.54e-08	1.17e-06	-1.9571	1
ENSMUSG00000039809.10	Gabbr2	872.414	-1.31807	0.25805	2.6e-08	1.19e-06	-2.49333	1
ENSMUSG00000056569.11	Mpz	71.3422	-1.96173	0.391351	2.69e-08	1.23e-06	-3.89528	1
ENSMUSG00000020901.13	Pik3r5	103.193	-1.78652	0.356324	2.85e-08	1.29e-06	-3.44982	1
ENSMUSG00000014602.15	Kif1a	5046.48	-0.854258	0.16434	2.87e-08	1.3e-06	-1.80783	1
ENSMUSG00000057897.14	Camk2b	4458.22	-0.759939	0.145366	3.04e-08	1.36e-06	-1.69342	1
ENSMUSG00000040181.14	Fmo1	356.607	-2.30074	0.463802	3.51e-08	1.57e-06	-4.9271	1
ENSMUSG00000034107.10	Ano7	35.356	-2.5476	0.515398	3.6e-08	1.61e-06	-5.84662	1
ENSMUSG00000031974.8	Abcb10	1448.6	-0.806835	0.156661	3.63e-08	1.62e-06	-1.74937	1
ENSMUSG00000026090.16	2010300C02Rik	423.008	-1.0493	0.205843	3.67e-08	1.62e-06	-2.06952	1
ENSMUSG00000029603.15	Dtx1	119.932	-1.84853	0.372415	3.79e-08	1.67e-06	-3.60133	1
ENSMUSG00000047228.9	A2ml1	128.407	-1.59199	0.318311	3.85e-08	1.7e-06	-3.01465	1
ENSMUSG00000031170.14	Slc38a5	619.493	-1.58572	0.317491	3.89e-08	1.71e-06	-3.00157	1
ENSMUSG00000028865.14	Cd164l2	128.034	-1.87469	0.380678	3.92e-08	1.72e-06	-3.66724	1
ENSMUSG00000079262.3	Slco1a6	504.148	-1.4954	0.299666	4.11e-08	1.8e-06	-2.81943	1
ENSMUSG00000026817.14	Ak1	754.827	-1.07986	0.214088	4.68e-08	2.04e-06	-2.11383	1
ENSMUSG00000008153.12	Clstn3	434.149	-1.18282	0.235632	4.75e-08	2.05e-06	-2.27019	1
ENSMUSG00000025092.7	Hspa12a	930.977	-0.824801	0.161183	4.73e-08	2.05e-06	-1.77129	1
ENSMUSG00000100094.1	1810008I18Rik	319.768	-1.11128	0.221167	4.98e-08	2.15e-06	-2.16037	1
ENSMUSG00000000544.14	Gpa33	195.913	-1.13411	0.226146	5.17e-08	2.2e-06	-2.19483	1
ENSMUSG00000062760.10	Shisal1	147.195	-1.41915	0.285948	5.15e-08	2.2e-06	-2.67427	1
ENSMUSG00000033436.13	Armcx2	1463.95	-0.968578	0.191979	5.39e-08	2.29e-06	-1.95691	1
ENSMUSG00000045009.9	Prrt3	57.7407	-2.44814	0.500399	5.59e-08	2.37e-06	-5.45713	1
ENSMUSG00000040525.13	Cblc	141.394	-1.70508	0.348856	5.97e-08	2.52e-06	-3.26048	1
ENSMUSG00000022415.12	Syngr1	928.653	-0.862154	0.170381	5.99e-08	2.52e-06	-1.81775	1
ENSMUSG00000034111.6	Tmed8	4763.37	-0.811594	0.159587	6.02e-08	2.53e-06	-1.75515	1
ENSMUSG00000038630.8	Zkscan16	251.225	-1.70527	0.348776	6.16e-08	2.58e-06	-3.26091	1
ENSMUSG00000078350.11	Smim1	614.573	-1.70549	0.349796	6.27e-08	2.61e-06	-3.26139	1
ENSMUSG00000024112.16	Cacna1h	116.436	-1.42852	0.291597	6.94e-08	2.85e-06	-2.6917	1
ENSMUSG00000034919.2	Ttc22	240.691	-1.52334	0.312481	7.08e-08	2.9e-06	-2.87455	1
ENSMUSG00000020788.15	Atp2a3	18568.7	-0.790885	0.156612	7.16e-08	2.92e-06	-1.73013	1
ENSMUSG00000030731.13	Syt3	100.187	-1.5942	0.326724	7.24e-08	2.95e-06	-3.01926	1
ENSMUSG00000024039.15	Cbs	626.438	-1.73684	0.359292	8.04e-08	3.26e-06	-3.33304	1
ENSMUSG00000024924.14	Vldlr	810.427	-1.27162	0.259884	8.06e-08	3.26e-06	-2.41433	1
ENSMUSG00000028469.15	Npr2	516.17	-0.981495	0.19784	8.11e-08	3.27e-06	-1.97451	1
ENSMUSG00000068735.14	Trp53i11	745.063	-1.29235	0.265117	8.87e-08	3.56e-06	-2.44926	1
ENSMUSG00000028088.14	Fmo5	193.272	-1.22942	0.251471	8.9e-08	3.57e-06	-2.34473	1
ENSMUSG00000052117.5	D630039A03Rik	355.638	-2.18491	0.457837	9.06e-08	3.61e-06	-4.54698	1
ENSMUSG00000024222.17	Fkbp5	2032.85	-0.842054	0.169078	9.29e-08	3.7e-06	-1.7926	1
ENSMUSG00000039230.14	Tbcd	2071.29	-1.15254	0.236122	9.67e-08	3.83e-06	-2.22305	1
ENSMUSG00000018999.14	Slc35b4	1674.84	-0.900918	0.18204	9.88e-08	3.9e-06	-1.86725	1
ENSMUSG00000021876.15	Rnase4	4490.52	-1.41659	0.293434	9.91e-08	3.91e-06	-2.66953	1
ENSMUSG00000002930.6	Ppp1r17	63.8459	-2.05729	0.43316	1.03e-07	4.07e-06	-4.16205	1
ENSMUSG00000037579.7	Kcnh3	72.1276	-1.88512	0.393577	1.06e-07	4.16e-06	-3.69385	1
ENSMUSG00000107008.3	Gm2762	47.7719	-2.09688	0.439743	1.08e-07	4.25e-06	-4.27783	1
ENSMUSG00000041907.9	Gpr45	757.116	-1.13648	0.233959	1.12e-07	4.38e-06	-2.19845	1
ENSMUSG00000061306.16	Slc38a10	6782.65	-0.969445	0.198786	1.29e-07	5.02e-06	-1.95809	1
ENSMUSG00000107317.1	Gm19719	24.5676	-3.45905	0.727434	1.29e-07	5.02e-06	-10.9971	1
ENSMUSG00000037126.16	Psd	784.845	-1.03305	0.213391	1.37e-07	5.29e-06	-2.04635	1
ENSMUSG00000072115.11	Ang	492.423	-1.40601	0.295364	1.39e-07	5.37e-06	-2.65003	1
ENSMUSG00000038060.15	Dlec1	43.6498	-2.399	0.5159	1.4e-07	5.39e-06	-5.27436	1
ENSMUSG00000027219.13	Slc28a2	88.8257	-1.90187	0.406131	1.44e-07	5.53e-06	-3.73698	1
ENSMUSG00000052613.16	Pcdh15	456.171	-1.09837	0.228547	1.5e-07	5.72e-06	-2.14112	1
ENSMUSG00000041831.16	Sytl3	36.395	-2.24455	0.479625	1.57e-07	5.99e-06	-4.73888	1
ENSMUSG00000029475.17	Kdm2b	1073.87	-0.907676	0.188261	1.85e-07	6.94e-06	-1.87602	1
ENSMUSG00000021069.17	Pygl	192.498	-1.31861	0.279498	1.94e-07	7.23e-06	-2.49426	1
ENSMUSG00000044912.11	Syt16	170.363	-1.4337	0.305574	1.95e-07	7.27e-06	-2.70139	1
ENSMUSG00000021913.8	Ogdhl	2377.23	-1.13249	0.23953	2.12e-07	7.84e-06	-2.19237	1
ENSMUSG00000039431.16	Mtmr7	2375.09	-0.741695	0.152959	2.26e-07	8.29e-06	-1.67214	1
ENSMUSG00000021733.11	Slc4a7	4071.41	-0.892602	0.186925	2.38e-07	8.72e-06	-1.85652	1
ENSMUSG00000044254.6	Pcsk9	592.058	-1.14168	0.243151	2.47e-07	8.97e-06	-2.20637	1
ENSMUSG00000028976.10	Slc2a5	5713.28	-0.808613	0.168171	2.57e-07	9.33e-06	-1.75153	1
ENSMUSG00000043168.12	4930426D05Rik	26.2175	-3.10497	0.671754	2.6e-07	9.41e-06	-8.60375	1
ENSMUSG00000025221.16	Kcnip2	66.3372	-3.1126	0.688329	2.76e-07	1e-05	-8.64942	1
ENSMUSG00000025582.4	Nptx1	512.034	-1.27675	0.274946	2.8e-07	1.01e-05	-2.42292	1
ENSMUSG00000085833.2	Gm13003	115.092	-1.70648	0.374561	2.93e-07	1.05e-05	-3.26363	1
ENSMUSG00000035285.6	Nat14	164.01	-1.25837	0.271315	2.99e-07	1.07e-05	-2.39226	1
ENSMUSG00000028989.3	Angptl7	36.7047	-2.68421	0.594148	3.18e-07	1.13e-05	-6.4273	1
ENSMUSG00000070348.5	Ccnd1	3492.07	-1.00711	0.215285	3.17e-07	1.13e-05	-2.00988	1
ENSMUSG00000038178.16	Slc43a2	3373	-0.677988	0.140877	3.19e-07	1.13e-05	-1.59991	1
ENSMUSG00000024899.7	Papss2	8251.97	-1.01758	0.217881	3.2e-07	1.13e-05	-2.02452	1
ENSMUSG00000053025.13	Sv2b	279.186	-1.40354	0.306472	3.45e-07	1.22e-05	-2.6455	1
ENSMUSG00000029093.14	Sorcs2	510.474	-1.12835	0.244418	3.65e-07	1.28e-05	-2.18608	1
ENSMUSG00000029163.9	Emilin1	1308.02	-1.69259	0.374565	3.7e-07	1.3e-05	-3.23237	1
ENSMUSG00000027230.9	Creb3l1	504.87	-1.48649	0.327705	3.98e-07	1.38e-05	-2.80206	1
ENSMUSG00000040938.16	Slc16a11	148.056	-1.51244	0.335258	3.98e-07	1.38e-05	-2.85291	1
ENSMUSG00000004366.4	Sst	53807.3	-0.859968	0.184339	4.2e-07	1.45e-05	-1.815	1
ENSMUSG00000025429.9	Pstpip2	154.267	-1.39229	0.307825	4.36e-07	1.5e-05	-2.62495	1
ENSMUSG00000027855.13	Sycp1	28.8811	-3.57329	0.796409	4.35e-07	1.5e-05	-11.9033	1
ENSMUSG00000034758.12	Tle6	174.365	-1.17894	0.258149	4.43e-07	1.52e-05	-2.2641	1
ENSMUSG00000001334.9	Fndc5	58.4011	-1.87876	0.42018	4.5e-07	1.54e-05	-3.67758	1
ENSMUSG00000028626.5	Col9a2	116.775	-1.73606	0.387711	4.55e-07	1.55e-05	-3.33125	1
ENSMUSG00000013419.7	Zfp651	637.89	-0.96453	0.208944	4.59e-07	1.56e-05	-1.95143	1
ENSMUSG00000074582.10	Arfgef2	2253.26	-0.730895	0.155393	4.74e-07	1.61e-05	-1.65967	1
ENSMUSG00000026986.14	Hnmt	54.9633	-2.04437	0.460493	4.85e-07	1.64e-05	-4.12492	1
ENSMUSG00000020265.16	Sumo3	2626.3	-0.750795	0.160604	4.96e-07	1.67e-05	-1.68272	1
ENSMUSG00000063558.4	Aox1	245.422	-1.36313	0.303734	5.13e-07	1.73e-05	-2.57242	1
ENSMUSG00000070577.5	Gm572	1059.53	-0.806523	0.173494	5.17e-07	1.74e-05	-1.74899	1
ENSMUSG00000034243.17	Golgb1	6809.53	-0.673709	0.143241	5.35e-07	1.79e-05	-1.59517	1
ENSMUSG00000117592.1	Gm46603	68.0937	-2.04915	0.464243	5.34e-07	1.79e-05	-4.13861	1
ENSMUSG00000057069.7	Ero1lb	41509.6	-0.761858	0.162961	5.57e-07	1.86e-05	-1.69567	1
ENSMUSG00000028755.3	Cda	319.403	-1.00743	0.221061	5.66e-07	1.88e-05	-2.01033	1
ENSMUSG00000085322.2	Gm14261	29.6287	-2.77633	0.63107	5.88e-07	1.95e-05	-6.85106	1
ENSMUSG00000021340.13	Gpld1	300.728	-0.995093	0.218627	6e-07	1.98e-05	-1.99321	1
ENSMUSG00000026617.16	Bpnt1	2403.82	-0.723163	0.155231	6.01e-07	1.98e-05	-1.6508	1
ENSMUSG00000020528.14	Prpsap2	579.303	-0.830291	0.180478	6.29e-07	2.06e-05	-1.77804	1
ENSMUSG00000027376.15	Prom2	31.1746	-2.91324	0.670162	6.35e-07	2.08e-05	-7.53306	1
ENSMUSG00000106714.1	Gm42546	198.349	-1.21192	0.271474	6.5e-07	2.12e-05	-2.31646	1
ENSMUSG00000039236.18	Isg20	842.722	-0.817639	0.178376	6.9e-07	2.24e-05	-1.76252	1
ENSMUSG00000029273.10	Sult1d1	1036.42	-1.19347	0.267765	7.13e-07	2.31e-05	-2.28702	1
ENSMUSG00000026692.12	Fmo4	31.3256	-3.02654	0.697064	7.17e-07	2.32e-05	-8.14852	1
ENSMUSG00000031995.9	St14	471.94	-0.92796	0.204767	7.19e-07	2.32e-05	-1.90258	1
ENSMUSG00000032193.9	Ldlr	4262.22	-1.01912	0.227243	7.64e-07	2.43e-05	-2.02668	1
ENSMUSG00000027971.16	Ndst4	709.964	-1.11676	0.250757	7.84e-07	2.5e-05	-2.16859	1
ENSMUSG00000043091.9	Tuba1c	449.358	-1.28653	0.292249	9.04e-07	2.84e-05	-2.4394	1
ENSMUSG00000026811.18	St6galnac6	592.6	-0.88504	0.197062	9.46e-07	2.95e-05	-1.84682	1
ENSMUSG00000055745.4	Rtl6	977.456	-0.787236	0.173666	9.47e-07	2.95e-05	-1.72577	1
ENSMUSG00000074981.13	Dcdc5	126.587	-1.72263	0.400298	9.45e-07	2.95e-05	-3.30038	1
ENSMUSG00000112470.1	5330439M10Rik	40.0573	-2.23741	0.524989	9.69e-07	3.01e-05	-4.71551	1
ENSMUSG00000002147.18	Stat6	553.836	-1.01963	0.230457	1.03e-06	3.2e-05	-2.0274	1
ENSMUSG00000044365.15	Cxxc4	2086.58	-0.768036	0.170115	1.07e-06	3.31e-05	-1.70295	1
ENSMUSG00000047638.15	Nr1h4	261.955	-0.948036	0.213995	1.11e-06	3.44e-05	-1.92924	1
ENSMUSG00000079056.12	Kcnip3	140.351	-1.57163	0.366362	1.15e-06	3.53e-05	-2.97241	1
ENSMUSG00000028804.20	Csmd2	178.471	-1.29563	0.30035	1.25e-06	3.84e-05	-2.45483	1
ENSMUSG00000036502.14	Tmem255a	333.478	-1.3553	0.315555	1.29e-06	3.94e-05	-2.5585	1
ENSMUSG00000013921.15	Clip3	708.266	-1.24305	0.288028	1.3e-06	3.95e-05	-2.36699	1
ENSMUSG00000037902.18	Sirpa	2256.37	-1.00308	0.229081	1.3e-06	3.95e-05	-2.00428	1
ENSMUSG00000032657.15	Fam189b	323.627	-1.1801	0.273645	1.32e-06	4.01e-05	-2.26592	1
ENSMUSG00000034245.10	Hdac11	1452.32	-0.886551	0.200893	1.34e-06	4.04e-05	-1.84875	1
ENSMUSG00000078671.11	Chd2	1656.35	-1.02378	0.236987	1.55e-06	4.61e-05	-2.03323	1
ENSMUSG00000091586.2	Cyp4f17	181.339	-1.16182	0.272019	1.65e-06	4.84e-05	-2.23739	1
ENSMUSG00000035713.15	Usp35	1094.45	-0.934486	0.215161	1.67e-06	4.88e-05	-1.91121	1
ENSMUSG00000035277.15	Arx	327.748	-1.01846	0.235928	1.68e-06	4.9e-05	-2.02576	1
ENSMUSG00000044628.5	Rnf208	77.5168	-1.444	0.341099	1.68e-06	4.91e-05	-2.72074	1
ENSMUSG00000026312.17	Cdh7	402.925	-1.01501	0.235381	1.72e-06	4.98e-05	-2.02092	1
ENSMUSG00000028607.16	Cpt2	1008.2	-0.835583	0.190759	1.73e-06	4.98e-05	-1.78458	1
ENSMUSG00000037239.8	Spred3	196.672	-1.52383	0.366904	1.83e-06	5.26e-05	-2.87554	1
ENSMUSG00000028845.15	Tekt2	138.658	-1.31518	0.312009	1.85e-06	5.28e-05	-2.48834	1
ENSMUSG00000096107.2	Gm16505	41.7142	-2.027	0.493816	2.09e-06	5.93e-05	-4.07557	1
ENSMUSG00000032109.15	Nlrx1	125.649	-1.27594	0.304858	2.13e-06	6.01e-05	-2.42157	1
ENSMUSG00000066800.11	Rnasel	124.404	-1.09015	0.256914	2.14e-06	6.03e-05	-2.12896	1
ENSMUSG00000103182.1	Gm37091	101.513	-1.24359	0.296059	2.15e-06	6.05e-05	-2.36787	1
ENSMUSG00000041633.14	Kctd12b	1801.85	-1.17973	0.280193	2.18e-06	6.11e-05	-2.26534	1
ENSMUSG00000037463.14	Fbxo27	40.7694	-2.35466	0.584648	2.21e-06	6.19e-05	-5.11475	1
ENSMUSG00000015363.13	Trabd	1808.82	-0.997876	0.234296	2.22e-06	6.19e-05	-1.99706	1
ENSMUSG00000027227.7	Sord	434.063	-1.1968	0.284712	2.24e-06	6.24e-05	-2.2923	1
ENSMUSG00000107881.1	Gm44250	491.245	-1.15019	0.272809	2.24e-06	6.24e-05	-2.21943	1
ENSMUSG00000094504.3	Gm5294	10.424	-7.03853	2.74112	2.36e-06	6.55e-05	-131.464	1
ENSMUSG00000025815.13	Dhtkd1	101.5	-1.84003	0.453507	2.44e-06	6.74e-05	-3.58018	1
ENSMUSG00000049164.7	Zfp518a	473.329	-1.08937	0.258829	2.46e-06	6.78e-05	-2.12781	1
ENSMUSG00000035964.8	Tmem59l	266.117	-1.33473	0.322276	2.54e-06	7e-05	-2.52229	1
ENSMUSG00000058488.7	Kl	761.216	-0.994316	0.235305	2.61e-06	7.16e-05	-1.99214	1
ENSMUSG00000027536.6	Chmp4c	1771.88	-0.999215	0.237196	2.73e-06	7.46e-05	-1.99891	1
ENSMUSG00000067629.13	Syngap1	868.077	-1.25735	0.304307	2.78e-06	7.59e-05	-2.39056	1
ENSMUSG00000020882.17	Cacnb1	245.131	-0.95659	0.226843	2.8e-06	7.62e-05	-1.94072	1
ENSMUSG00000047181.12	Samd14	360.364	-1.00302	0.238305	2.8e-06	7.62e-05	-2.0042	1
ENSMUSG00000016758.4	Bik	73.4881	-1.3577	0.32964	2.82e-06	7.65e-05	-2.56277	1
ENSMUSG00000040434.16	Large2	368.438	-1.20967	0.292332	2.82e-06	7.65e-05	-2.31285	1
ENSMUSG00000039395.8	Mreg	556.501	-1.36937	0.333099	2.83e-06	7.67e-05	-2.58357	1
ENSMUSG00000010066.15	Cacna2d2	79.7178	-1.33091	0.322574	2.88e-06	7.77e-05	-2.51562	1
ENSMUSG00000032280.16	Tle3	2029.25	-1.12079	0.269531	2.92e-06	7.87e-05	-2.17466	1
ENSMUSG00000097666.2	A330094K24Rik	47.1631	-1.75746	0.431794	2.97e-06	7.99e-05	-3.38103	1
ENSMUSG00000022853.7	Ehhadh	208.112	-1.30458	0.317911	3e-06	8.05e-05	-2.47012	1
ENSMUSG00000041245.13	Wnk3	1266.3	-0.999982	0.239005	3e-06	8.05e-05	-1.99998	1
ENSMUSG00000053182.11	Gm609	271.03	-1.19702	0.289599	3.03e-06	8.11e-05	-2.29265	1
ENSMUSG00000030838.19	Ush1c	1431.77	-0.816507	0.191652	3.03e-06	8.12e-05	-1.76114	1
ENSMUSG00000031302.16	Nlgn3	40.9958	-2.06627	0.512131	3.05e-06	8.14e-05	-4.18801	1
ENSMUSG00000002908.17	Kcnn1	60.9468	-1.50072	0.369202	3.11e-06	8.26e-05	-2.82984	1
ENSMUSG00000039263.16	Npepl1	1624.73	-1.01898	0.244557	3.18e-06	8.41e-05	-2.02648	1
ENSMUSG00000019820.11	Utrn	4074.79	-0.728188	0.169725	3.19e-06	8.44e-05	-1.65656	1
ENSMUSG00000085636.1	Gm11769	75.4537	-1.55458	0.383144	3.28e-06	8.63e-05	-2.93748	1
ENSMUSG00000054277.8	Arfgap3	2006.62	-0.712153	0.165706	3.31e-06	8.66e-05	-1.63825	1
ENSMUSG00000089682.10	Bcl2l2	2222.62	-0.659735	0.152499	3.34e-06	8.75e-05	-1.57979	1
ENSMUSG00000025038.7	Efhc2	162.313	-1.15804	0.28142	3.36e-06	8.77e-05	-2.23153	1
ENSMUSG00000020263.14	Appl2	1781.91	-0.936573	0.223903	3.39e-06	8.86e-05	-1.91398	1
ENSMUSG00000031838.8	Ifi30	441.394	-0.77192	0.181397	3.46e-06	9.01e-05	-1.70754	1
ENSMUSG00000020886.17	Dlg4	1386.08	-0.824143	0.195096	3.48e-06	9.02e-05	-1.77048	1
ENSMUSG00000022419.16	Deptor	2848.32	-1.02653	0.247738	3.51e-06	9.1e-05	-2.03712	1
ENSMUSG00000015533.9	Itga2	178.101	-1.20348	0.29381	3.59e-06	9.26e-05	-2.30295	1
ENSMUSG00000001700.10	Gramd3	3122.09	-0.786156	0.185592	3.61e-06	9.31e-05	-1.72447	1
ENSMUSG00000020715.9	Ern1	3063.76	-0.832969	0.19808	3.76e-06	9.64e-05	-1.78135	1
ENSMUSG00000071547.4	Nt5dc2	1332.31	-0.657476	0.153325	3.92e-06	0.0001	-1.57732	1
ENSMUSG00000021474.9	Sfxn1	1223.61	-0.777105	0.184444	4.12e-06	0.000105	-1.71369	1
ENSMUSG00000069805.10	Fbp1	131.103	-1.15945	0.284812	4.14e-06	0.000105	-2.23372	1
ENSMUSG00000035469.17	Rcbtb1	1624.47	-0.727013	0.171631	4.18e-06	0.000106	-1.65521	1
ENSMUSG00000045288.10	Ush1g	19.1759	-2.93372	0.733705	4.26e-06	0.000108	-7.64077	1
ENSMUSG00000081219.1	Bambi-ps1	164.725	-1.48019	0.372275	4.33e-06	0.00011	-2.78985	1
ENSMUSG00000058638.14	Zfp110	862.405	-0.78871	0.189081	4.84e-06	0.000122	-1.72753	1
ENSMUSG00000043964.14	Orai3	455.926	-1.12047	0.278041	4.97e-06	0.000125	-2.17418	1
ENSMUSG00000029759.9	Pon3	388.82	-0.813107	0.196014	5.07e-06	0.000127	-1.75699	1
ENSMUSG00000000215.11	Ins2	2.09712e+06	-1.04881	0.25921	5.08e-06	0.000127	-2.06882	1
ENSMUSG00000049536.5	Tceal1	514.91	-0.800929	0.19287	5.09e-06	0.000127	-1.74222	1
ENSMUSG00000071648.4	Rom1	200.135	-0.910602	0.222689	5.46e-06	0.000136	-1.87983	1
ENSMUSG00000037681.13	Esyt3	28.8351	-2.22247	0.571918	5.54e-06	0.000138	-4.66693	1
ENSMUSG00000000303.12	Cdh1	6401.7	-0.769613	0.185658	5.58e-06	0.000138	-1.70481	1
ENSMUSG00000029602.11	Rasal1	33.6806	-2.2074	0.570038	5.58e-06	0.000138	-4.61844	1
ENSMUSG00000038738.15	Shank1	72.3405	-1.38941	0.352348	5.63e-06	0.000139	-2.61971	1
ENSMUSG00000035041.8	Creb3l3	17.8793	-3.52669	0.90008	5.79e-06	0.000142	-11.5249	1
ENSMUSG00000074671.6	Tspyl3	94.8401	-1.48929	0.380131	5.79e-06	0.000142	-2.8075	1
ENSMUSG00000053399.9	Adamts18	207.781	-1.07921	0.269389	5.83e-06	0.000143	-2.11287	1
ENSMUSG00000087094.1	Gm13093	31.6105	-2.01696	0.521665	5.97e-06	0.000146	-4.04731	1
ENSMUSG00000032679.12	Cd59a	237.21	-1.06831	0.267551	6.45e-06	0.000156	-2.09698	1
ENSMUSG00000002265.17	Peg3	39865.9	-0.768407	0.186998	6.52e-06	0.000157	-1.70339	1
ENSMUSG00000104301.3	Wdr49	143.457	-1.34843	0.345557	6.72e-06	0.000162	-2.54636	1
ENSMUSG00000029153.11	Ociad2	2723.01	-0.877836	0.217451	6.81e-06	0.000164	-1.83762	1
ENSMUSG00000024030.7	Abcg1	1434.76	-0.746537	0.181652	6.91e-06	0.000165	-1.67776	1
ENSMUSG00000073889.10	Il11ra1	320.484	-0.810193	0.1988	6.91e-06	0.000165	-1.75345	1
ENSMUSG00000036872.16	Abcc12	28.5492	-2.08102	0.542738	7.32e-06	0.000175	-4.23105	1
ENSMUSG00000060969.9	Irx1	520.492	-1.03682	0.261489	7.33e-06	0.000175	-2.0517	1
ENSMUSG00000070315.12	4930581F22Rik	75.5407	-1.4732	0.381559	7.35e-06	0.000175	-2.77637	1
ENSMUSG00000031442.21	Mcf2l	3760.7	-0.668538	0.161517	7.38e-06	0.000176	-1.58946	1
ENSMUSG00000000394.15	Gcg	811952	-0.949351	0.238301	7.68e-06	0.000182	-1.931	1
ENSMUSG00000008206.16	Cers4	372.86	-0.93656	0.234686	7.7e-06	0.000182	-1.91396	1
ENSMUSG00000030170.14	Wnt5b	51.7395	-1.62675	0.424733	7.95e-06	0.000188	-3.08816	1
ENSMUSG00000015342.6	Xk	538.776	-0.894169	0.223537	7.99e-06	0.000189	-1.85854	1
ENSMUSG00000115801.1	AC160336.1	970.622	-0.955743	0.240416	8.02e-06	0.000189	-1.93958	1
ENSMUSG00000070780.11	Rbm47	891.096	-0.922552	0.231357	8.06e-06	0.00019	-1.89547	1
ENSMUSG00000032101.6	Ddx25	294.275	-0.994424	0.251022	8.11e-06	0.000191	-1.99228	1
ENSMUSG00000116652.2	B830017H08Rik	1551.51	-1.06322	0.270609	8.11e-06	0.000191	-2.08959	1
ENSMUSG00000045165.6	AI467606	290.014	-1.13965	0.292204	8.16e-06	0.000191	-2.20327	1
ENSMUSG00000032349.13	Elovl5	2371.33	-0.601156	0.145014	8.56e-06	0.0002	-1.51693	1
ENSMUSG00000009378.4	Slc16a12	2642.7	-0.796471	0.198387	9.17e-06	0.000213	-1.73685	1
ENSMUSG00000043629.12	1700019D03Rik	915.777	-0.924818	0.234406	9.43e-06	0.000219	-1.89845	1
ENSMUSG00000083695.6	Rnf138rt1	420.831	-1.92839	0.518114	9.57e-06	0.000222	-3.8063	1
ENSMUSG00000028264.16	Spaca1	17.9613	-2.66307	0.704146	9.66e-06	0.000224	-6.33381	1
ENSMUSG00000080115.3	Eef1akmt3	91.1436	-1.74195	0.467499	1.03e-05	0.000237	-3.34488	1
ENSMUSG00000016239.11	Lonrf3	73.0417	-1.63693	0.43641	1.07e-05	0.000245	-3.11003	1
ENSMUSG00000029635.15	Cdk8	1972.97	-0.648765	0.159899	1.1e-05	0.000252	-1.56783	1
ENSMUSG00000044461.6	Shisa2	304.675	-1.04456	0.270435	1.1e-05	0.000252	-2.06274	1
ENSMUSG00000047193.16	Dync2h1	2385.64	-0.561695	0.136682	1.14e-05	0.00026	-1.476	1
ENSMUSG00000027947.11	Il6ra	4074.62	-0.740891	0.185963	1.18e-05	0.000268	-1.67121	1
ENSMUSG00000039745.8	Htatip2	181.49	-0.885962	0.226662	1.18e-05	0.000268	-1.848	1
ENSMUSG00000038486.9	Sv2a	2283.57	-0.898557	0.230532	1.19e-05	0.000269	-1.8642	1
ENSMUSG00000027630.13	Tbl1xr1	447.595	-0.905406	0.232659	1.21e-05	0.000274	-1.87307	1
ENSMUSG00000079071.2	Slc28a2b	137.707	-1.81865	0.496806	1.21e-05	0.000274	-3.52752	1
ENSMUSG00000038267.15	Slc22a23	1936.98	-0.694526	0.173445	1.22e-05	0.000276	-1.61835	1
ENSMUSG00000034427.17	Myo15b	599.165	-0.832497	0.212095	1.23e-05	0.000278	-1.78076	1
ENSMUSG00000106164.1	9430085M18Rik	40.1048	-1.84041	0.500662	1.28e-05	0.000287	-3.58112	1
ENSMUSG00000038172.14	Ttc39b	2585.14	-0.758861	0.191899	1.28e-05	0.000288	-1.69215	1
ENSMUSG00000031255.14	Sytl4	8592.22	-0.66656	0.166208	1.29e-05	0.000289	-1.58728	1
ENSMUSG00000034673.14	Pbx2	980.835	-0.699207	0.175523	1.3e-05	0.000291	-1.62361	1
ENSMUSG00000021999.9	Cpb2	119.917	-1.09054	0.285949	1.31e-05	0.000293	-2.12954	1
ENSMUSG00000039607.16	Rbms3	481.018	-1.30344	0.348099	1.31e-05	0.000293	-2.46816	1
ENSMUSG00000030788.16	Rnf141	2945.07	-0.903809	0.234053	1.38e-05	0.000307	-1.871	1
ENSMUSG00000081303.2	Gm16011	126.887	-1.39844	0.377087	1.41e-05	0.000313	-2.63617	1
ENSMUSG00000027893.14	Ahcyl1	5508.92	-0.551101	0.136192	1.43e-05	0.000315	-1.4652	1
ENSMUSG00000022797.16	Tfrc	1868.01	-0.984803	0.258767	1.51e-05	0.000332	-1.97904	1
ENSMUSG00000058153.15	Sez6l	5792.82	-1.00028	0.262236	1.51e-05	0.000332	-2.00039	1
ENSMUSG00000072966.11	Gprasp2	1423.6	-0.794192	0.204508	1.56e-05	0.000342	-1.73411	1
ENSMUSG00000068551.12	Zfp467	312.644	-0.898133	0.234133	1.57e-05	0.000344	-1.86365	1
ENSMUSG00000039126.10	Prune2	2889.68	-0.967374	0.254701	1.59e-05	0.000347	-1.95528	1
ENSMUSG00000067578.3	Cbln4	36.4508	-1.99084	0.554739	1.61e-05	0.000351	-3.97469	1
ENSMUSG00000022629.17	Kif21a	3204.6	-0.740333	0.189772	1.66e-05	0.000361	-1.67056	1
ENSMUSG00000063077.15	Kif1b	4799.68	-0.794927	0.205635	1.69e-05	0.000368	-1.73499	1
ENSMUSG00000038984.4	Tspyl5	184.464	-0.982546	0.260276	1.76e-05	0.00038	-1.97595	1
ENSMUSG00000045691.14	Thtpa	734.66	-0.687296	0.175414	1.77e-05	0.000381	-1.61026	1
ENSMUSG00000006529.16	Itih1	20.2088	-2.47816	0.690828	1.77e-05	0.000382	-5.57186	1
ENSMUSG00000038884.14	Shfl	987.671	-0.891842	0.234676	1.79e-05	0.000385	-1.85554	1
ENSMUSG00000020432.12	Tcn2	1163.98	-0.750928	0.193793	1.8e-05	0.000387	-1.68288	1
ENSMUSG00000097908.7	4933404O12Rik	245.744	-1.09022	0.293304	1.82e-05	0.00039	-2.12907	1
ENSMUSG00000036887.5	C1qa	1015.72	-0.991193	0.26476	1.89e-05	0.000402	-1.98783	1
ENSMUSG00000059921.15	Unc5c	546.696	-0.748538	0.193578	1.9e-05	0.000405	-1.68009	1
ENSMUSG00000061175.12	Fnip2	1797.16	-0.986245	0.262585	1.92e-05	0.000408	-1.98102	1
ENSMUSG00000073888.13	Ccl27a	129.163	-1.14888	0.312336	1.97e-05	0.000415	-2.21742	1
ENSMUSG00000092130.2	D030025P21Rik	12.5798	-3.5729	0.979985	1.98e-05	0.000418	-11.9001	1
ENSMUSG00000028825.7	Rhd	74.6543	-1.31787	0.364408	2.04e-05	0.00043	-2.49299	1
ENSMUSG00000047787.8	Flrt1	323.134	-0.98096	0.263899	2.17e-05	0.000454	-1.97378	1
ENSMUSG00000039396.11	Neil3	166.335	-1.3318	0.37127	2.29e-05	0.000476	-2.51716	1
ENSMUSG00000030793.4	Pycard	113.202	-1.38942	0.391261	2.32e-05	0.00048	-2.61973	1
ENSMUSG00000021464.14	Ror2	558.871	-1.0099	0.274472	2.37e-05	0.000491	-2.01378	1
ENSMUSG00000046731.5	Kctd11	342.547	-0.758596	0.199481	2.4e-05	0.000496	-1.69184	1
ENSMUSG00000003865.16	Gys1	176.552	-1.00731	0.273632	2.44e-05	0.000504	-2.01016	1
ENSMUSG00000029420.14	Rimbp2	8150.57	-0.584769	0.149673	2.48e-05	0.00051	-1.4998	1
ENSMUSG00000027748.11	Trpc4	92.3823	-1.43291	0.404201	2.5e-05	0.000514	-2.69991	1
ENSMUSG00000075420.6	Smim6	115.522	-1.2126	0.33795	2.53e-05	0.000519	-2.31755	1
ENSMUSG00000032253.13	Phip	3221.79	-0.687126	0.179565	2.56e-05	0.000525	-1.61007	1
ENSMUSG00000073684.13	Faap20	376.196	-0.812415	0.217435	2.7e-05	0.000551	-1.75615	1
ENSMUSG00000026131.20	Dst	10730.1	-0.577758	0.148957	2.77e-05	0.000564	-1.49253	1
ENSMUSG00000037762.6	Slc16a9	499.834	-0.966899	0.264504	2.78e-05	0.000565	-1.95463	1
ENSMUSG00000057182.15	Scn3a	691.418	-0.957002	0.261741	2.79e-05	0.000566	-1.94127	1
ENSMUSG00000027801.7	Tm4sf4	7779.86	-0.807062	0.216656	2.88e-05	0.000581	-1.74964	1
ENSMUSG00000020261.15	Slc36a1	1356.49	-0.648265	0.169531	2.89e-05	0.000582	-1.56728	1
ENSMUSG00000021263.11	Degs2	37.5132	-2.14694	0.628112	2.94e-05	0.000592	-4.42886	1
ENSMUSG00000029777.10	Gars	3973.03	-0.689187	0.182022	3e-05	0.000604	-1.61238	1
ENSMUSG00000004151.17	Etv1	2009.58	-0.973247	0.268135	3.01e-05	0.000604	-1.96325	1
ENSMUSG00000094472.1	Gm21897	31.1449	-1.7223	0.495691	3.03e-05	0.000607	-3.29961	1
ENSMUSG00000045394.9	Epcam	2792.12	-0.63159	0.165265	3.07e-05	0.000615	-1.54927	1
ENSMUSG00000040998.18	Npnt	1260.62	-0.646554	0.169878	3.12e-05	0.000623	-1.56542	1
ENSMUSG00000107191.1	Gm43579	28.9869	-2.27651	0.664752	3.14e-05	0.000627	-4.84504	1
ENSMUSG00000023873.13	1700010I14Rik	24.9785	-2.06331	0.60175	3.21e-05	0.000641	-4.17943	1
ENSMUSG00000031232.17	Magt1	4958.94	-0.780602	0.210412	3.22e-05	0.000642	-1.71785	1
ENSMUSG00000030067.17	Foxp1	1339.57	-0.838296	0.228283	3.32e-05	0.00066	-1.78794	1
ENSMUSG00000044345.9	Marveld1	507.51	-0.914823	0.252714	3.47e-05	0.000686	-1.88534	1
ENSMUSG00000070802.5	Pnmal2	6366.58	-0.867596	0.238199	3.49e-05	0.000689	-1.82462	1
ENSMUSG00000023232.17	Serinc2	68.7468	-1.48689	0.431085	3.54e-05	0.000697	-2.80284	1
ENSMUSG00000113571.1	Gm48137	115.819	-1.02413	0.286821	3.54e-05	0.000697	-2.03373	1
ENSMUSG00000037341.14	Slc9a7	835.751	-0.840859	0.230596	3.57e-05	0.000702	-1.79112	1
ENSMUSG00000038024.17	Dennd4c	5673.51	-0.840999	0.230589	3.58e-05	0.000704	-1.79129	1
ENSMUSG00000020847.15	Rph3al	2978.3	-0.543843	0.141467	3.6e-05	0.000706	-1.45785	1
ENSMUSG00000106847.1	Peg13	2811.31	-0.699756	0.187611	3.6e-05	0.000706	-1.62423	1
ENSMUSG00000000214.11	Th	699.993	-0.715727	0.192607	3.68e-05	0.00072	-1.64231	1
ENSMUSG00000034467.7	Dynlrb2	29.9995	-2.02521	0.596351	3.69e-05	0.000722	-4.0705	1
ENSMUSG00000020653.12	Klf11	936.938	-0.842569	0.23146	3.71e-05	0.000724	-1.79324	1
ENSMUSG00000022900.14	Ildr1	1124.88	-0.659658	0.175666	3.73e-05	0.000728	-1.57971	1
ENSMUSG00000115867.1	Gm17753	13.3011	-3.15082	0.913993	3.81e-05	0.00074	-8.88159	1
ENSMUSG00000028546.17	Elavl4	960.846	-0.654839	0.174928	3.83e-05	0.000743	-1.57444	1
ENSMUSG00000044433.16	Camsap3	382.413	-0.743825	0.201539	3.84e-05	0.000746	-1.67461	1
ENSMUSG00000053552.14	Ebf4	29.7181	-1.97563	0.587325	3.9e-05	0.000756	-3.933	1
ENSMUSG00000055053.18	Nfic	1502.12	-0.880687	0.245335	4.06e-05	0.000784	-1.84125	1
ENSMUSG00000094282.1	Cfap73	41.4007	-2.12425	0.63661	4.07e-05	0.000785	-4.35975	1
ENSMUSG00000112803.1	Gm36543	81.9032	-1.14043	0.327045	4.07e-05	0.000785	-2.20447	1
ENSMUSG00000022456.18	2021-09-03	214.12	-1.32756	0.388009	4.1e-05	0.000788	-2.50978	1
ENSMUSG00000079497.4	Gm13420	70.8138	-1.27286	0.368632	4.1e-05	0.000788	-2.4164	1
ENSMUSG00000029173.12	Sepsecs	3107.49	-0.765674	0.209489	4.11e-05	0.000789	-1.70016	1
ENSMUSG00000005373.13	Mlxipl	5721.72	-0.812376	0.22444	4.15e-05	0.000795	-1.7561	1
ENSMUSG00000047953.7	Gp5	25.0432	-2.35219	0.707564	4.32e-05	0.000824	-5.10599	1
ENSMUSG00000009292.18	Trpm2	274.116	-1.20501	0.350128	4.34e-05	0.000825	-2.30539	1
ENSMUSG00000041237.12	Pklr	299.873	-0.981394	0.278305	4.4e-05	0.000835	-1.97437	1
ENSMUSG00000039058.11	Ak5	64.5463	-1.38968	0.409334	4.43e-05	0.000839	-2.6202	1
ENSMUSG00000057530.14	Ece1	10442.8	-0.661273	0.178304	4.45e-05	0.000843	-1.58148	1
ENSMUSG00000056306.5	Sertm1	55.6751	-2.28769	0.694106	4.5e-05	0.000851	-4.88273	1
ENSMUSG00000050854.9	Tmem125	19.7582	-2.51955	0.758697	4.53e-05	0.000855	-5.73402	1
ENSMUSG00000100572.1	2410021H03Rik	176.628	-1.01229	0.289246	4.54e-05	0.000855	-2.01711	1
ENSMUSG00000087403.9	Kantr	471.531	-0.830572	0.231713	4.72e-05	0.000887	-1.77839	1
ENSMUSG00000070737.10	Tmem35b	143.762	-1.02452	0.294514	4.8e-05	0.000898	-2.03429	1
ENSMUSG00000037738.11	Nek5	91.0686	-1.63901	0.493159	4.83e-05	0.000902	-3.11453	1
ENSMUSG00000038793.8	Lefty1	172.607	-0.92657	0.263353	4.87e-05	0.000909	-1.90075	1
ENSMUSG00000021559.14	Dapk1	1578.71	-0.55862	0.14875	4.94e-05	0.000918	-1.47286	1
ENSMUSG00000015942.9	Gtf2ird2	292.668	-0.779712	0.21643	4.96e-05	0.00092	-1.71679	1
ENSMUSG00000041096.13	Tspyl2	1347.4	-0.63188	0.171376	4.99e-05	0.000925	-1.54958	1
ENSMUSG00000052271.7	Bhlha15	448.339	-1.29005	0.381353	4.99e-05	0.000925	-2.44536	1
ENSMUSG00000031174.17	Rpgr	461.086	-0.769982	0.213749	5.01e-05	0.000927	-1.70525	1
ENSMUSG00000025318.13	Jph3	590.016	-0.818938	0.22942	5.07e-05	0.000935	-1.76411	1
ENSMUSG00000056050.13	Mia3	8675.59	-0.594848	0.158663	5.11e-05	0.000943	-1.51031	1
ENSMUSG00000046982.11	Tshz1	2710.26	-0.915525	0.260941	5.2e-05	0.000957	-1.88626	1
ENSMUSG00000053141.16	Ptprt	1996.57	-0.735967	0.203708	5.23e-05	0.000957	-1.66551	1
ENSMUSG00000051851.5	Rtl8c	334.736	-0.979627	0.281786	5.25e-05	0.00096	-1.97196	1
ENSMUSG00000018168.8	Ikzf3	72.7783	-1.32717	0.395723	5.27e-05	0.000963	-2.50911	1
ENSMUSG00000058297.16	Spock2	11356.3	-0.788522	0.221259	5.41e-05	0.000985	-1.7273	1
ENSMUSG00000054320.16	Lrrc36	118.174	-1.66153	0.506011	5.47e-05	0.000995	-3.16351	1
ENSMUSG00000020891.11	Alox8	26.2099	-2.23216	0.697724	5.52e-05	0.00100181	-4.69836	1
ENSMUSG00000089663.1	Gm15651	63.2464	-1.85393	0.575256	5.56e-05	0.00100841	-3.61483	1
ENSMUSG00000044017.16	Adgrd1	22.4273	-2.26549	0.695421	5.79e-05	0.00104587	-4.80819	1
ENSMUSG00000019852.7	Arfgef3	4377	-0.654407	0.179648	5.82e-05	0.00105121	-1.57397	1
ENSMUSG00000031853.5	Map3k21	260.958	-0.825633	0.235513	6.27e-05	0.00112192	-1.77231	1
ENSMUSG00000009108.15	Gnat2	305.004	-1.27197	0.384403	6.37e-05	0.00113579	-2.41491	1
ENSMUSG00000035606.8	Ky	1790.33	-0.749743	0.211659	6.49e-05	0.00115287	-1.68149	1
ENSMUSG00000033684.14	Qsox1	2357.79	-0.647832	0.179698	6.56e-05	0.00116218	-1.56681	1
ENSMUSG00000062859.15	Tcp11	228.233	-1.24087	0.374056	6.62e-05	0.00117084	-2.36341	1
ENSMUSG00000040794.5	C1qtnf4	181.932	-0.913907	0.266085	6.75e-05	0.0011907	-1.88414	1
ENSMUSG00000061414.8	Cracr2a	36.3916	-1.71466	0.530506	6.78e-05	0.00119262	-3.2822	1
ENSMUSG00000036908.17	Unc93b1	502.665	-0.850383	0.245518	6.86e-05	0.00120504	-1.80298	1
ENSMUSG00000040234.16	Tm7sf3	932.791	-0.577996	0.158085	6.89e-05	0.0012085	-1.49277	1
ENSMUSG00000087077.1	Gm12480	23.502	-1.83366	0.569644	7.08e-05	0.00123628	-3.56441	1
ENSMUSG00000027168.21	Pax6	7163.35	-0.704546	0.198679	7.13e-05	0.00124047	-1.62963	1
ENSMUSG00000035804.5	Ins1	932481	-1.03681	0.308666	7.21e-05	0.00125199	-2.05169	1
ENSMUSG00000003355.7	Fkbp11	436.99	-1.51177	0.471574	7.54e-05	0.00130405	-2.8516	1
ENSMUSG00000061232.16	H2-K1	6352.68	-0.602336	0.166978	7.59e-05	0.00131064	-1.51817	1
ENSMUSG00000046178.3	Nxph1	226.664	-0.961911	0.285035	7.93e-05	0.0013629	-1.94789	1
ENSMUSG00000042632.17	Pla2g6	978.687	-0.671094	0.189369	7.95e-05	0.00136512	-1.59228	1
ENSMUSG00000009092.5	Derl3	217.134	-1.16762	0.355532	8e-05	0.00137245	-2.2464	1
ENSMUSG00000027004.3	Frzb	5044.27	-0.909758	0.268055	8.14e-05	0.00139462	-1.87873	1
ENSMUSG00000117916.1	9630028I04Rik	19.6197	-2.02893	0.639982	8.16e-05	0.00139608	-4.08103	1
ENSMUSG00000024130.16	Abca3	2362.06	-0.602264	0.168195	8.58e-05	0.00146091	-1.5181	1
ENSMUSG00000005148.8	Klf5	544.6	-0.937074	0.280751	9.25e-05	0.00156343	-1.91464	1
ENSMUSG00000026922.13	Agpat2	217.155	-0.859916	0.255438	9.52e-05	0.00160137	-1.81493	1
ENSMUSG00000038708.10	Golga4	7066.92	-0.520494	0.144728	9.89e-05	0.00165727	-1.43445	1
ENSMUSG00000001663.10	Gstt1	460.759	-0.805398	0.238849	0.000106	0.0017641	-1.74763	1
ENSMUSG00000014791.10	Elmo3	717.82	-0.851493	0.255307	0.000108	0.00180275	-1.80437	1
ENSMUSG00000022464.14	Slc38a4	5401.3	-0.570983	0.161767	0.00011	0.00183036	-1.48554	1
ENSMUSG00000087259.7	2610035D17Rik	154.705	-1.17354	0.368182	0.00011	0.00183036	-2.25565	1
ENSMUSG00000051817.8	Sox12	384.927	-0.920759	0.279339	0.000111	0.00184041	-1.89311	1
ENSMUSG00000032066.9	Bco2	38.9575	-1.49772	0.480653	0.000112	0.00185622	-2.82397	1
ENSMUSG00000078747.9	Gm20878	12.5351	-3.07435	1.03323	0.000114	0.00187392	-8.4231	1
ENSMUSG00000114493.2	Gm47071	31.8837	-1.5813	0.514256	0.000116	0.00189423	-2.99239	1
ENSMUSG00000038260.10	Trpm4	268.204	-0.908479	0.277161	0.000117	0.00190927	-1.87707	1
ENSMUSG00000019027.8	Dnah1	11.8972	-3.44823	1.45144	0.000123	0.00200435	-10.9149	1
ENSMUSG00000046761.13	Fam83h	539.122	-0.672499	0.19633	0.000124	0.0020044	-1.59383	1
ENSMUSG00000036923.12	Stox1	366.92	-0.756417	0.225694	0.000125	0.00202928	-1.68929	1
ENSMUSG00000043760.16	Pkhd1	338.962	-0.810906	0.244526	0.000126	0.00204453	-1.75431	1
ENSMUSG00000063652.10	Slc22a21	26.2521	-1.8964	0.635143	0.000128	0.00206073	-3.72283	1
ENSMUSG00000035121.6	Neil2	388.301	-0.958954	0.297294	0.00013	0.00209245	-1.9439	1
ENSMUSG00000038764.14	Ptpn3	299.929	-0.828416	0.251059	0.00013	0.00209273	-1.77574	1
ENSMUSG00000033318.7	Gstt2	210.443	-1.15206	0.367303	0.000131	0.00211257	-2.22231	1
ENSMUSG00000023911.12	Flywch2	60.0353	-1.10004	0.347561	0.000133	0.00213469	-2.14361	1
ENSMUSG00000040972.8	Igsf21	142.689	-0.995355	0.310557	0.000134	0.0021473	-1.99357	1
ENSMUSG00000008393.9	Carhsp1	943.33	-0.699823	0.206986	0.000134	0.00215047	-1.6243	1
ENSMUSG00000035498.10	Cdcp1	848.443	-0.755089	0.226497	0.000135	0.00217123	-1.68774	1
ENSMUSG00000022861.17	Dgkg	109.507	-1.03039	0.323389	0.000137	0.00218894	-2.04258	1
ENSMUSG00000037315.15	Jade3	2281.86	-0.640395	0.187388	0.000138	0.00219515	-1.55876	1
ENSMUSG00000074272.10	Ceacam1	250.918	-0.79044	0.239013	0.000138	0.00219677	-1.7296	1
ENSMUSG00000045034.12	Ankrd34b	25.4959	-2.14574	0.724543	0.000139	0.00220835	-4.4252	1
ENSMUSG00000027434.11	Nkx2-2	2747.73	-0.508969	0.144303	0.000139	0.00221061	-1.42303	1
ENSMUSG00000027259.15	Adal	254.948	-0.78757	0.238749	0.000144	0.00227749	-1.72616	1
ENSMUSG00000035776.14	Cd99l2	675.86	-0.783844	0.237332	0.000144	0.00227749	-1.72171	1
ENSMUSG00000021203.15	Otub2	226.651	-0.962528	0.301913	0.000146	0.00231177	-1.94872	1
ENSMUSG00000020629.12	Adi1	2252.44	-0.674709	0.200223	0.000148	0.00234453	-1.59627	1
ENSMUSG00000020679.11	Hnf1b	507.491	-0.631856	0.185745	0.00015	0.00236744	-1.54956	1
ENSMUSG00000042460.5	C1galt1	3219.96	-0.77848	0.236552	0.00015	0.00236744	-1.71532	1
ENSMUSG00000020182.16	Ddc	6767.19	-0.526758	0.151129	0.000153	0.00239289	-1.44069	1
ENSMUSG00000031559.15	4930555F03Rik	32.2379	-1.5273	0.512393	0.000154	0.00240188	-2.88246	1
ENSMUSG00000085929.1	Gm13421	110.31	-1.07427	0.343768	0.000154	0.00240188	-2.10566	1
ENSMUSG00000054728.17	Phactr1	4287.14	-0.752275	0.228043	0.000154	0.00240448	-1.68445	1
ENSMUSG00000100009.6	Gm7967	81.9945	-1.46915	0.488881	0.000154	0.00240448	-2.7686	1
ENSMUSG00000046447.3	Camk2n1	7025.74	-0.768771	0.233931	0.000156	0.00242131	-1.70382	1
ENSMUSG00000051590.10	Map3k19	37.4976	-1.95752	0.665151	0.000156	0.00243078	-3.88393	1
ENSMUSG00000044726.8	Erich5	45.897	-1.30541	0.427281	0.000158	0.00245788	-2.47153	1
ENSMUSG00000034903.18	Cobll1	1788.44	-0.619519	0.182587	0.00016	0.0024835	-1.53636	1
ENSMUSG00000003534.17	Ddr1	4410.41	-0.490135	0.139953	0.000162	0.00250139	-1.40458	1
ENSMUSG00000036944.6	Tmem71	132.074	-0.870949	0.271595	0.000165	0.00254324	-1.82887	1
ENSMUSG00000004864.13	Mapk13	62.3154	-1.28492	0.426216	0.000167	0.00257097	-2.43668	1
ENSMUSG00000006527.16	Sfmbt1	1193.79	-0.511826	0.147558	0.000169	0.00259435	-1.42585	1
ENSMUSG00000042340.6	Ctf1	27.1609	-1.91852	0.659987	0.00017	0.00260727	-3.78034	1
ENSMUSG00000024942.17	Capn1	703.595	-0.60969	0.182594	0.00017	0.00260737	-1.52593	1
ENSMUSG00000071005.7	Ccl19	19.0104	-1.92759	0.656295	0.000172	0.00263003	-3.80418	1
ENSMUSG00000091472.2	Gm3739	12.7752	-2.57517	0.87809	0.000172	0.00263007	-5.95939	1
ENSMUSG00000073096.11	Lrrc61	457.654	-0.606704	0.179406	0.000172	0.00263557	-1.52278	1
ENSMUSG00000049241.5	Hcar1	78.0758	-1.41249	0.474586	0.000174	0.00265181	-2.66197	1
ENSMUSG00000046329.14	Slc25a23	933.911	-0.625278	0.186218	0.000179	0.00272518	-1.54251	1
ENSMUSG00000019900.19	Rfx6	2840.25	-0.582048	0.171559	0.00018	0.00274056	-1.49697	1
ENSMUSG00000013076.17	Amotl1	1251.38	-0.628108	0.187679	0.000182	0.00276831	-1.54554	1
ENSMUSG00000029576.17	Radil	81.282	-1.24852	0.416852	0.000187	0.00284366	-2.37598	1
ENSMUSG00000026031.15	Cflar	1288.05	-0.587392	0.174003	0.000189	0.00286214	-1.50253	1
ENSMUSG00000053647.4	Gper1	24.4916	-2.07846	0.724344	0.000189	0.00286214	-4.22355	1
ENSMUSG00000054408.9	Spcs3	7618.74	-0.691736	0.21103	0.000196	0.00293711	-1.61523	1
ENSMUSG00000068686.12	Cd59b	31.2726	-1.46588	0.498587	0.000197	0.00294603	-2.76232	1
ENSMUSG00000054065.12	Pkp3	146.996	-1.01803	0.331979	0.000199	0.00297272	-2.02515	1
ENSMUSG00000027215.13	Cd82	966.397	-0.657155	0.199252	0.000199	0.00298188	-1.57697	1
ENSMUSG00000040969.14	Arhgef38	47.3691	-1.21127	0.404654	0.000202	0.0030134	-2.31542	1
ENSMUSG00000021947.11	Cryl1	816.298	-0.703621	0.215939	0.000203	0.0030286	-1.62859	1
ENSMUSG00000042589.18	Cux2	586.844	-0.94039	0.304121	0.000204	0.00303491	-1.91905	1
ENSMUSG00000032456.13	Nmnat3	137.975	-0.986974	0.321808	0.000205	0.00305074	-1.98202	1
ENSMUSG00000029878.6	Dbpht2	2442.31	-1.00023	0.327724	0.000213	0.00315715	-2.00032	1
ENSMUSG00000044937.15	Ttc41	160.956	-0.842254	0.268084	0.000214	0.0031684	-1.79285	1
ENSMUSG00000007783.10	Cpt1c	304.078	-0.734105	0.228595	0.000216	0.00319016	-1.66337	1
ENSMUSG00000025935.10	Tram1	5129.32	-0.760341	0.238043	0.000217	0.00319754	-1.69389	1
ENSMUSG00000026049.11	Tex30	270.687	-0.703024	0.217223	0.000217	0.00320366	-1.62791	1
ENSMUSG00000040189.18	Ccdc114	63.7138	-1.27705	0.436458	0.000218	0.00321431	-2.42344	1
ENSMUSG00000040699.13	Limd2	545.057	-0.74859	0.23406	0.000219	0.00321768	-1.68015	1
ENSMUSG00000054457.5	9430021M05Rik	25.7458	-1.68865	0.592027	0.000223	0.00327282	-3.22356	1
ENSMUSG00000020256.14	Aldh1l2	183.069	-1.21417	0.411103	0.000224	0.00327782	-2.32006	1
ENSMUSG00000039313.14	Minar1	100.376	-1.22427	0.415318	0.000224	0.00327782	-2.33638	1
ENSMUSG00000030376.8	Slc8a2	151.415	-0.942324	0.306951	0.000228	0.00332544	-1.92162	1
ENSMUSG00000064125.14	Prr36	80.1134	-1.51937	0.535628	0.000228	0.00332544	-2.86665	1
ENSMUSG00000020940.13	Efcab15	155.157	-0.803209	0.254994	0.000232	0.00337682	-1.74498	1
ENSMUSG00000004267.16	Eno2	625.88	-0.759583	0.239157	0.000232	0.00337687	-1.693	1
ENSMUSG00000078880.10	Gm14308	52.6919	-1.37491	0.473705	0.000233	0.00338604	-2.59352	1
ENSMUSG00000096935.5	1700113A16Rik	75.5218	-1.12081	0.377807	0.000234	0.00339756	-2.17468	1
ENSMUSG00000038248.8	Sobp	811.721	-0.656999	0.202035	0.000237	0.00342676	-1.5768	1
ENSMUSG00000047642.15	D930020B18Rik	10.8179	-3.03051	1.04285	0.000238	0.00343462	-8.17097	1
ENSMUSG00000087141.1	Plcxd2	711.837	-0.827053	0.26515	0.00024	0.00345972	-1.77406	1
ENSMUSG00000062157.6	Ifnlr1	31.7143	-1.44834	0.503523	0.000242	0.00348638	-2.72895	1
ENSMUSG00000096929.7	A330023F24Rik	306.516	-1.49582	0.528906	0.000244	0.00351381	-2.82023	1
ENSMUSG00000030800.10	Prss8	82.0681	-1.19804	0.408604	0.000245	0.00352139	-2.29427	1
ENSMUSG00000049672.15	Zbtb14	926.478	-0.64072	0.197051	0.000247	0.00355074	-1.55911	1
ENSMUSG00000058441.7	Panx2	134.184	-1.06243	0.357363	0.000252	0.00360692	-2.08845	1
ENSMUSG00000048497.11	Mmgt2	506.023	-0.798595	0.256224	0.000253	0.00361998	-1.73941	1
ENSMUSG00000038560.7	Sp6	22.4337	-1.88024	0.675386	0.000254	0.0036245	-3.68137	1
ENSMUSG00000050954.15	Zfp169	181.776	-0.843079	0.274005	0.000259	0.00369316	-1.79387	1
ENSMUSG00000015112.15	Slc25a13	111.841	-1.07327	0.364316	0.000269	0.00381675	-2.1042	1
ENSMUSG00000035246.16	Pcyt1b	931.513	-0.794798	0.256206	0.000272	0.00386208	-1.73483	1
ENSMUSG00000062563.15	Cys1	72.2907	-1.08794	0.370493	0.000275	0.00389858	-2.1257	1
ENSMUSG00000002020.15	Ltbp2	62.8235	-2.22617	0.797386	0.000282	0.00397791	-4.67889	1
ENSMUSG00000044629.5	Cnrip1	137.109	-0.827499	0.269819	0.000288	0.0040523	-1.77461	1
ENSMUSG00000024376.7	Epb41l4a	219.541	-0.959943	0.32243	0.000292	0.00409091	-1.94523	1
ENSMUSG00000036572.16	Upf3b	1446.96	-0.736826	0.235938	0.000292	0.00409091	-1.66651	1
ENSMUSG00000030598.15	Fbxo17	108.863	-0.831691	0.272492	0.000295	0.00411676	-1.77977	1
ENSMUSG00000025867.8	Cplx2	12312.6	-1.0278	0.351288	0.000303	0.00419816	-2.03892	1
ENSMUSG00000054459.8	Vsnl1	176.545	-1.02682	0.350476	0.000306	0.0042165	-2.03753	1
ENSMUSG00000021090.16	Lrrc9	8.81177	-3.94868	1.35379	0.000313	0.00430245	-15.4409	1
ENSMUSG00000087355.7	Gm13187	8.32674	-4.10656	1.42026	0.000318	0.00436529	-17.2265	1
ENSMUSG00000028017.7	Egf	235.492	-1.16625	0.410351	0.000321	0.00440585	-2.24428	1
ENSMUSG00000018581.15	Dnah11	126.608	-1.30462	0.469981	0.000323	0.00442499	-2.47018	1
ENSMUSG00000090799.2	Klhl33	43.3446	-1.22686	0.434566	0.000323	0.00442499	-2.34057	1
ENSMUSG00000022809.4	Nr1i2	11.3606	-3.05065	1.10745	0.000328	0.00448152	-8.28585	1
ENSMUSG00000118256.1	Gm50303	98.1819	-0.889441	0.299268	0.000344	0.004649	-1.85246	1
ENSMUSG00000029864.7	Gstk1	72.8825	-1.10234	0.387188	0.000352	0.00475318	-2.14703	1
ENSMUSG00000022525.13	Plaat1	13.2583	-2.33846	0.881474	0.000356	0.00478125	-5.05762	1
ENSMUSG00000070661.6	Rnf186	140.658	-0.952097	0.327635	0.000361	0.00483968	-1.93468	1
ENSMUSG00000038167.6	Plekhg6	20.0353	-1.84153	0.695556	0.000365	0.00488852	-3.5839	1
ENSMUSG00000026443.3	Lrrn2	226.08	-0.931658	0.319851	0.000369	0.0049375	-1.90747	1
ENSMUSG00000097184.2	4632428C04Rik	245.499	-1.05542	0.371881	0.000371	0.00494585	-2.07833	1
ENSMUSG00000071265.10	1700086L19Rik	1756.94	-0.874106	0.297322	0.000381	0.0050462	-1.83287	1
ENSMUSG00000091898.8	Tnnc1	42.2936	-1.25355	0.455314	0.000385	0.00509578	-2.38428	1
ENSMUSG00000036473.16	Tbc1d24	697.951	-0.813383	0.273705	0.000388	0.00512182	-1.75733	1
ENSMUSG00000025480.5	Syce1	23.6613	-1.70459	0.642334	0.000393	0.00518155	-3.25937	1
ENSMUSG00000094893.2	Gm4791	130.335	-0.780758	0.260803	0.000394	0.00519471	-1.71803	1
ENSMUSG00000026304.13	Rab17	18.8113	-1.99654	0.753969	0.000401	0.00525974	-3.99042	1
ENSMUSG00000057132.16	Rpgrip1	19.0916	-2.26604	0.908776	0.000403	0.00527707	-4.81	1
ENSMUSG00000049555.10	Tmie	64.9534	-1.02536	0.362708	0.000422	0.00550337	-2.03547	1
ENSMUSG00000058159.14	T2	294.338	-1.1569	0.421275	0.000425	0.00553389	-2.22977	1
ENSMUSG00000019467.15	Arhgef25	243.107	-0.901383	0.312797	0.000427	0.00554472	-1.86786	1
ENSMUSG00000028536.12	2610528J11Rik	33.139	-1.6096	0.61903	0.00043	0.00558746	-3.05167	1
ENSMUSG00000007594.10	Hapln4	533.337	-2.99495	1.2733	0.000433	0.00561402	-7.97202	1
ENSMUSG00000041762.16	Gpr155	442.706	-0.846762	0.290974	0.00044	0.00568213	-1.79846	1
ENSMUSG00000095105.2	Edaradd	38.0958	-1.29981	0.481672	0.000451	0.00580161	-2.46197	1
ENSMUSG00000110027.1	C030029H02Rik	38.1936	-1.60101	0.642785	0.000459	0.00588537	-3.03356	1
ENSMUSG00000045348.16	Nyap1	247.463	-0.83502	0.2873	0.000463	0.00592532	-1.78388	1
ENSMUSG00000029651.16	Mtus2	121.546	-0.836548	0.28831	0.000469	0.00598349	-1.78577	1
ENSMUSG00000102059.1	Gm20257	132.057	-0.947708	0.3361	0.000473	0.00601611	-1.92881	1
ENSMUSG00000071531.3	Gprin2	44.7476	-1.64495	0.644735	0.000474	0.00603016	-3.12737	1
ENSMUSG00000036459.15	Wtip	121.77	-0.974591	0.348477	0.00048	0.00608991	-1.96508	1
ENSMUSG00000001670.13	Tat	339.595	-1.13243	0.419462	0.000493	0.0062354	-2.19228	1
ENSMUSG00000040170.13	Fmo2	129.196	-0.865658	0.302521	0.000503	0.00633798	-1.82217	1
ENSMUSG00000059824.12	Dbp	2469.51	-1.01342	0.367493	0.000506	0.00636738	-2.01869	1
ENSMUSG00000045053.2	Kcng3	65.0236	-1.14241	0.424294	0.000508	0.00638672	-2.20749	1
ENSMUSG00000048652.12	Samd13	94.6535	-1.18936	0.446729	0.000508	0.00638672	-2.28051	1
ENSMUSG00000006411.12	Nectin4	32.1455	-1.44529	0.55235	0.000512	0.00642931	-2.72318	1
ENSMUSG00000026196.7	Bard1	96.0174	-1.06868	0.392671	0.000521	0.00652105	-2.09751	1
ENSMUSG00000017740.17	Slc12a5	255.621	-1.10456	0.413491	0.000538	0.00670734	-2.15033	1
ENSMUSG00000033579.16	Fa2h	15.5415	-1.94167	0.766635	0.000545	0.00676955	-3.8415	1
ENSMUSG00000032816.15	Igdcc4	76.1474	-0.954291	0.344413	0.000559	0.00689574	-1.93763	1
ENSMUSG00000043300.2	B3galnt1	762.172	-0.913964	0.33015	0.000585	0.00715921	-1.88422	1
ENSMUSG00000079434.8	Neu2	23.1184	-1.81557	0.735772	0.000587	0.00717406	-3.51998	1
ENSMUSG00000040856.17	Dlk1	161.728	-0.95329	0.348043	0.000597	0.00726592	-1.93628	1
ENSMUSG00000110146.1	Gm45487	69.877	-1.23183	0.476774	0.000601	0.00729497	-2.34865	1
ENSMUSG00000091735.2	Gpr62	18.8089	-1.72348	0.689986	0.000611	0.00738857	-3.30232	1
ENSMUSG00000004035.12	Gstm7	62.3215	-1.01868	0.379695	0.000649	0.0077748	-2.02606	1
ENSMUSG00000020728.17	Cep112	155.553	-0.958631	0.353844	0.000648	0.0077748	-1.94347	1
ENSMUSG00000074345.4	Tnfaip8l3	49.1818	-1.2971	0.512363	0.000666	0.00794284	-2.45735	1
ENSMUSG00000030321.15	Efcab12	29.4269	-1.36028	0.547098	0.000702	0.00829114	-2.56734	1
ENSMUSG00000035486.14	Plk5	20.4121	-1.55104	0.631683	0.000713	0.00839302	-2.93027	1
ENSMUSG00000097467.2	Gm26737	30.4917	-1.60227	0.706178	0.000746	0.00872804	-3.0362	1
ENSMUSG00000034936.2	Arl4d	321.532	-0.976467	0.371359	0.000766	0.0089016	-1.96764	1
ENSMUSG00000046719.7	Nxph3	38.0983	-1.36626	0.556313	0.000772	0.00895932	-2.57802	1
ENSMUSG00000021991.9	Cacna2d3	17.3021	-1.70937	0.714546	0.000783	0.00905536	-3.27019	1
ENSMUSG00000032313.11	Tmem266	49.3487	-1.01035	0.39026	0.000824	0.00944352	-2.0144	1
ENSMUSG00000022033.9	Pbk	651.662	-1.07166	0.425685	0.000912	0.010155	-2.10186	1
ENSMUSG00000086022.1	Rad51ap2	124.242	-1.04849	0.417937	0.000944	0.0104562	-2.06836	1
ENSMUSG00000100707.1	Gm28523	35.3843	-1.1551	0.469763	0.000959	0.0105867	-2.227	1
ENSMUSG00000038009.7	Dnajc22	35.0249	-1.68338	0.734194	0.000967	0.0106638	-3.2118	1
ENSMUSG00000024846.6	Cst6	44.2074	-1.14241	0.469852	0.00104584	0.0113775	-2.2075	1
ENSMUSG00000030443.16	Zfp583	40.9804	-1.22041	0.528509	0.00113517	0.012164	-2.33013	1
ENSMUSG00000052374.16	Actn2	33.4915	-1.1539	0.483935	0.00114138	0.0122154	-2.22514	1
ENSMUSG00000022435.6	Upk3a	40.1497	-1.43083	0.633311	0.00116242	0.0124018	-2.69602	1
ENSMUSG00000051067.8	Lingo3	10.5468	-2.28359	1.04633	0.00116186	0.0124018	-4.86887	1
ENSMUSG00000110724.1	Gm47824	9.51804	-2.75613	1.28289	0.00117201	0.0124964	-6.75581	1
ENSMUSG00000032564.16	Cpne4	27.8502	-1.41459	0.644228	0.00119098	0.0126357	-2.66584	1
ENSMUSG00000092192.7	Dnaaf4	37.0374	-1.1353	0.474322	0.0011979	0.0126787	-2.19665	1
ENSMUSG00000043664.7	Tmem221	19.5597	-1.55398	0.707366	0.00134698	0.0140049	-2.93626	1
ENSMUSG00000075569.10	Rsph10b	21.9526	-1.46704	0.686089	0.0013613	0.0141194	-2.76455	1
ENSMUSG00000118119.1	Gm9937	8.06639	-3.53237	1.54753	0.00139626	0.0144037	-11.5704	1
ENSMUSG00000055202.11	Zfp811	24.8656	-1.49284	0.685995	0.00140812	0.0144824	-2.81442	1
ENSMUSG00000025576.17	Rbfox3	51.8352	-1.11981	0.485537	0.00145539	0.0148351	-2.17318	1
ENSMUSG00000045761.16	Togaram2	65.3733	-1.39842	0.694666	0.00149222	0.0151204	-2.63614	1
ENSMUSG00000097619.8	4833422M21Rik	19.2677	-1.55865	0.743662	0.00149877	0.0151602	-2.94578	1
ENSMUSG00000047606.4	Ankrd34c	32.4392	-1.30562	0.606129	0.00160734	0.0160969	-2.47189	1
ENSMUSG00000036492.12	Rnf39	29.2475	-1.51321	0.744619	0.00169189	0.0167964	-2.85445	1
ENSMUSG00000085912.2	Trp53cor1	24.9191	-1.41547	0.682697	0.00177005	0.0173513	-2.66748	1
ENSMUSG00000023393.15	Slc17a9	231.556	-1.91395	1.05251	0.00177895	0.0173988	-3.76839	1
ENSMUSG00000046580.10	Gm7862	12.6496	-2.34729	1.22184	0.0018472	0.0179056	-5.08868	1
ENSMUSG00000002771.12	Grin2d	20.4754	-1.45736	0.726266	0.00201874	0.0191646	-2.74606	1
ENSMUSG00000021219.16	Rgs6	40.2649	-1.24616	0.605837	0.00204488	0.0193311	-2.3721	1
ENSMUSG00000025329.3	Padi1	9.04455	-2.27925	1.23023	0.0020453	0.0193311	-4.85426	1
ENSMUSG00000053545.6	6430503K07Rik	17.5726	-1.49733	0.764133	0.00209216	0.019698	-2.8232	1
ENSMUSG00000100490.1	Gm28455	17.6837	-1.39482	0.6966	0.00211831	0.0198787	-2.62956	1
ENSMUSG00000084866.2	A930006K02Rik	23.6543	-1.32859	0.65879	0.00212725	0.0199408	-2.51156	1
ENSMUSG00000036760.7	Kcnk9	11.9759	-1.6867	0.874471	0.00219051	0.0204066	-3.2192	1
ENSMUSG00000097203.2	4732419C18Rik	13.8149	-1.86235	1.00644	0.00223229	0.0207215	-3.63599	1
ENSMUSG00000059854.8	Hydin	12.8531	-1.80307	1.0448	0.00240015	0.0219236	-3.48963	1
ENSMUSG00000030544.5	Mesp1	32.0072	-1.31543	0.68236	0.00243916	0.0222089	-2.48876	1
ENSMUSG00000097899.2	Gm16894	7.29068	-2.36005	1.28617	0.00261842	0.0235288	-5.13389	1
ENSMUSG00000110230.1	Gm45846	11.7	-2.23342	1.34077	0.00267125	0.0238534	-4.70246	1
ENSMUSG00000110086.1	Gm45623	17.8828	-1.45908	0.799828	0.00267307	0.0238573	-2.74933	1
ENSMUSG00000039059.11	Hrh3	18.9851	-1.75775	1.05789	0.00274431	0.0242471	-3.3817	1
ENSMUSG00000073197.9	5730507C01Rik	10.9941	-1.94365	1.12955	0.00294888	0.0256903	-3.84679	1
ENSMUSG00000035638.14	Muc20	8.15727	-2.12571	1.35	0.00353536	0.0297208	-4.36416	1
ENSMUSG00000000263.15	Glra1	11.422	-1.82071	1.16651	0.00360902	0.0302425	-3.53255	1
ENSMUSG00000085158.1	Gm14264	12.696	-1.44185	0.895807	0.00405922	0.0329367	-2.7167	1
ENSMUSG00000031344.11	Gabrq	7.84271	-1.7762	1.40942	0.00560809	0.0413196	-3.42523	1
ENSMUSG00000048502.14	Duxbl1	14.2582	-1.42945	1.47925	0.00596081	0.043158	-2.69345	1
ENSMUSG00000115767.1	Gm10366	10.2975	-1.54743	1.53847	0.00643314	0.0457661	-2.92296	1
ENSMUSG00000044499.11	Hs3st5	9.15388	-1.46242	1.3328	0.00723764	0.0501573	-2.7557	1

## Sheet: Upregulated Genes
geneID	geneSymbol	baseMean	log2FoldChange	lfcSE	pvalue	padj	FC	flag
ENSMUSG00000028172.5	Tacr3	609.929	4.90439	0.274761	2.11594e-72	3.62778e-68	29.9481	1
ENSMUSG00000032122.15	Slc37a2	353.728	5.95018	0.367383	1.41488e-60	1.21291e-56	61.8276	1
ENSMUSG00000047230.6	Cldn2	325.241	2.92014	0.230963	7.42664e-38	1.41478e-34	7.5692	1
ENSMUSG00000037005.16	Xpnpep2	330.361	7.56199	0.61255	1.66873e-35	2.60094e-32	188.967	1
ENSMUSG00000035540.12	Gc	6317.16	1.86782	0.158486	3.36172e-33	4.43359e-30	3.64981	1
ENSMUSG00000027238.17	Frmd5	1313.42	2.37056	0.203243	1.19605e-32	1.46473e-29	5.17142	1
ENSMUSG00000038168.5	P3h2	330.882	2.78368	0.24675	1.01854e-30	9.19095e-28	6.88608	1
ENSMUSG00000032083.8	Apoa1	137.213	5.44758	0.49073	1.37141e-29	1.06876e-26	43.6399	1
ENSMUSG00000031271.14	Serpina7	782.707	2.82362	0.262301	2.7909e-28	1.77222e-25	7.07937	1
ENSMUSG00000040690.15	Col16a1	713.935	2.36022	0.242944	1.54556e-23	6.30921e-21	5.13448	1
ENSMUSG00000027048.15	Abcb11	125.023	3.13827	0.325913	1.95249e-23	7.43898e-21	8.80468	1
ENSMUSG00000027674.16	Pex5l	3019.55	1.83963	0.194317	1.95038e-22	6.68786e-20	3.57918	1
ENSMUSG00000087579.7	Hectd2os	108.75	4.47474	0.485051	1.32018e-21	4.35278e-19	22.2347	1
ENSMUSG00000001020.8	S100a4	410.375	3.14817	0.348365	8.75476e-21	2.63334e-18	8.86529	1
ENSMUSG00000025592.17	Dach2	306.117	2.46502	0.275765	2.30942e-20	6.59916e-18	5.52136	1
ENSMUSG00000002007.5	Srpk3	98.5939	3.10017	0.348702	3.47052e-20	9.5971e-18	8.57517	1
ENSMUSG00000048612.16	Myof	490.98	1.9997	0.225615	4.90074e-20	1.31286e-17	3.99918	1
ENSMUSG00000001270.9	Ckb	2625.13	2.22451	0.251293	5.25847e-20	1.38702e-17	4.67351	1
ENSMUSG00000031635.14	Anxa10	66.9922	4.98116	0.563679	6.29106e-20	1.63425e-17	31.5849	1
ENSMUSG00000030621.17	Me3	279.391	2.10536	0.247817	1.19527e-18	2.73239e-16	4.30306	1
ENSMUSG00000020684.14	Rasl10b	231.689	2.16972	0.26004	4.5539e-18	1.01398e-15	4.49936	1
ENSMUSG00000029121.16	Crmp1	886.123	1.8681	0.22578	8.65902e-18	1.87923e-15	3.6505	1
ENSMUSG00000040966.10	Slc22a2	85.1761	3.27484	0.406184	4.83915e-17	9.64735e-15	9.67886	1
ENSMUSG00000002808.7	Epdr1	431.537	1.52625	0.189226	5.68214e-17	1.11977e-14	2.88037	1
ENSMUSG00000019278.5	Dpep1	95.4876	3.53392	0.447261	8.73608e-17	1.68292e-14	11.5828	1
ENSMUSG00000021071.16	Trim9	1082.53	1.71999	0.221672	5.87546e-16	1.0385e-13	3.29435	1
ENSMUSG00000030218.2	Mgp	1202.09	1.59343	0.205268	6.18172e-16	1.08149e-13	3.01766	1
ENSMUSG00000032033.11	Barx2	182.867	3.18592	0.415252	9.24701e-16	1.5854e-13	9.10031	1
ENSMUSG00000012428.9	Steap4	354.047	1.78145	0.236183	3.17605e-15	5.18603e-13	3.43771	1
ENSMUSG00000062515.3	Fabp4	340.213	1.89122	0.25176	3.76146e-15	6.02713e-13	3.70949	1
ENSMUSG00000032878.16	Ccdc85a	183.904	2.13367	0.285195	4.618e-15	7.19779e-13	4.38833	1
ENSMUSG00000038370.6	Pcp4l1	1484.41	2.64197	0.354498	4.78095e-15	7.38463e-13	6.24184	1
ENSMUSG00000038515.10	Grtp1	1293.29	1.55988	0.208961	6.28732e-15	9.53947e-13	2.94829	1
ENSMUSG00000037362.8	Ccn3	240.163	2.49653	0.339116	1.06021e-14	1.56702e-12	5.64326	1
ENSMUSG00000031285.14	Dcx	762.894	1.4392	0.195125	1.33531e-14	1.89206e-12	2.71171	1
ENSMUSG00000069307.6	Hist1h2bq	111.826	2.97364	0.410606	2.40045e-14	3.26633e-12	7.85514	1
ENSMUSG00000020083.13	Fam241b	1120.37	1.61357	0.224407	4.61383e-14	6.05916e-12	3.06008	1
ENSMUSG00000039481.5	Nrtn	279.319	1.69281	0.236616	5.82893e-14	7.51407e-12	3.23286	1
ENSMUSG00000087149.8	Itih5l-ps	54.8714	4.57897	0.662223	6.27591e-14	8.02989e-12	23.9005	1
ENSMUSG00000103428.1	Gm20754	45.4208	3.90308	0.550558	7.5691e-14	9.54208e-12	14.9604	1
ENSMUSG00000116814.1	Gm49636	222.617	2.64518	0.384254	3.157e-13	3.68209e-11	6.25576	1
ENSMUSG00000027894.14	Slc6a17	2867.99	1.27101	0.183759	4.17139e-13	4.73632e-11	2.41331	1
ENSMUSG00000022519.14	Srl	177.977	3.19232	0.4742	5.04088e-13	5.64875e-11	9.14082	1
ENSMUSG00000021850.14	ccdc198	79.0321	2.6849	0.394001	5.8357e-13	6.45396e-11	6.43035	1
ENSMUSG00000030428.16	Ttyh1	518.147	2.1511	0.319234	8.93509e-13	9.51504e-11	4.44167	1
ENSMUSG00000033721.16	Vav3	121.786	2.45418	0.365058	9.99873e-13	1.05171e-10	5.48	1
ENSMUSG00000028369.15	Svep1	122.484	2.52966	0.379634	1.62618e-12	1.66951e-10	5.77437	1
ENSMUSG00000000301.16	Pemt	113.444	2.22894	0.336929	2.02371e-12	2.04097e-10	4.6879	1
ENSMUSG00000024552.16	Slc14a2	196.813	2.33323	0.353118	2.21512e-12	2.20804e-10	5.03932	1
ENSMUSG00000021795.10	Sftpd	103.721	2.95852	0.454334	4.0056e-12	3.71221e-10	7.77324	1
ENSMUSG00000030158.12	Clec12b	49.5155	2.99831	0.468454	9.48818e-12	8.47265e-10	7.99064	1
ENSMUSG00000032609.12	Klhdc8b	1684.8	1.23878	0.191943	1.00328e-11	8.9126e-10	2.35999	1
ENSMUSG00000044033.16	Ccdc141	165.072	1.89469	0.300616	1.54207e-11	1.34207e-09	3.71842	1
ENSMUSG00000031112.10	Stk26	1232.03	1.25494	0.199866	3.07223e-11	2.59475e-09	2.38657	1
ENSMUSG00000020218.11	Wif1	71.5765	3.24848	0.529617	4.6691e-11	3.87269e-09	9.50366	1
ENSMUSG00000070471.3	Erich6	180.104	1.67405	0.273241	6.1015e-11	4.98144e-09	3.19109	1
ENSMUSG00000024502.10	Jakmip2	77.0556	3.01076	0.50298	6.19486e-11	5.03369e-09	8.05988	1
ENSMUSG00000061576.15	Dpp6	1309.76	1.23215	0.202023	9.94284e-11	7.85576e-09	2.34917	1
ENSMUSG00000052572.19	Dlg2	283.302	2.37126	0.396874	1.20307e-10	9.41673e-09	5.17394	1
ENSMUSG00000031111.16	Igsf1	1712.47	1.04614	0.172565	1.5529e-10	1.18331e-08	2.065	1
ENSMUSG00000097789.2	Gm2115	497.95	2.47696	0.420655	2.06112e-10	1.53643e-08	5.56722	1
ENSMUSG00000117984.1	Gm31819	27.8914	4.34675	0.726609	2.75662e-10	2.04599e-08	20.347	1
ENSMUSG00000001025.8	S100a6	240.555	1.71032	0.291027	2.7853e-10	2.05836e-08	3.27233	1
ENSMUSG00000034891.13	Sncb	1045.33	1.21007	0.204363	2.99842e-10	2.20635e-08	2.31349	1
ENSMUSG00000048458.8	Inka2	198.683	1.68209	0.289471	3.9374e-10	2.83642e-08	3.20894	1
ENSMUSG00000026308.8	Klhl30	37.2787	3.48308	0.599989	4.39577e-10	3.14023e-08	11.1818	1
ENSMUSG00000020053.18	Igf1	129.979	1.91306	0.329767	4.70439e-10	3.33292e-08	3.76607	1
ENSMUSG00000029685.15	Asb15	47.6902	2.4732	0.429225	5.17047e-10	3.57451e-08	5.55274	1
ENSMUSG00000005540.10	Fcer2a	36.215	4.49683	0.795782	6.86691e-10	4.63516e-08	22.5777	1
ENSMUSG00000068270.15	Shroom4	318.261	1.28695	0.223567	7.58449e-10	5.05977e-08	2.44012	1
ENSMUSG00000006378.15	Gcat	384.079	1.85852	0.327021	8.00976e-10	5.30221e-08	3.62635	1
ENSMUSG00000030609.18	Aen	654.351	1.11752	0.194043	8.69591e-10	5.73428e-08	2.16974	1
ENSMUSG00000004698.11	Hdac9	523.888	1.73959	0.308914	1.16769e-09	7.55475e-08	3.33941	1
ENSMUSG00000037605.16	Adgrl3	554.877	1.04563	0.183861	1.43364e-09	9.07001e-08	2.06427	1
ENSMUSG00000024008.16	Cpne5	127.779	1.81608	0.325724	1.57105e-09	9.83053e-08	3.52123	1
ENSMUSG00000097636.8	Mirt1	58.9459	3.58294	0.649834	1.61179e-09	1.00488e-07	11.9832	1
ENSMUSG00000008398.15	Elk3	1515.05	1.00195	0.177491	1.96669e-09	1.19996e-07	2.00271	1
ENSMUSG00000024659.15	Anxa1	212.509	2.37964	0.432695	2.04619e-09	1.22893e-07	5.20407	1
ENSMUSG00000061322.15	Dnaic1	210.3	1.31638	0.236118	2.05001e-09	1.22893e-07	2.4904	1
ENSMUSG00000031538.6	Plat	413.351	1.52738	0.275552	2.14328e-09	1.27592e-07	2.88262	1
ENSMUSG00000034295.10	Fhod3	1398.34	1.12421	0.202072	2.69544e-09	1.57223e-07	2.17982	1
ENSMUSG00000025393.12	Atp5b	16330	0.872887	0.154794	2.99155e-09	1.71539e-07	1.83132	1
ENSMUSG00000048483.6	Zdhhc22	434.145	2.31491	0.426413	3.18731e-09	1.80949e-07	4.97573	1
ENSMUSG00000007480.4	Mc5r	57.3209	3.5659	0.659637	3.30784e-09	1.87171e-07	11.8425	1
ENSMUSG00000021676.10	Iqgap2	717.096	1.04754	0.190995	4.5978e-09	2.50252e-07	2.06701	1
ENSMUSG00000035615.12	Frmpd1	52.2297	2.17645	0.406365	5.23537e-09	2.83156e-07	4.52041	1
ENSMUSG00000071519.6	Prss3	443.645	2.59781	0.488014	5.29225e-09	2.85332e-07	6.05365	1
ENSMUSG00000026950.18	Neb	201.801	1.64036	0.311164	8.84782e-09	4.61082e-07	3.11743	1
ENSMUSG00000058119.6	Gm5771	155.877	2.88186	0.553671	9.58408e-09	4.94937e-07	7.371	1
ENSMUSG00000048978.14	Nrsn1	756.527	1.57495	0.299144	9.76155e-09	5.01328e-07	2.97925	1
ENSMUSG00000032965.11	Ift57	2000.35	0.805634	0.149963	1.37221e-08	6.83148e-07	1.74791	1
ENSMUSG00000042942.18	Greb1l	155.676	2.97215	0.582576	1.38953e-08	6.86555e-07	7.84705	1
ENSMUSG00000106270.1	C820005J03Rik	116.081	1.37769	0.264147	1.46575e-08	7.18006e-07	2.59851	1
ENSMUSG00000116066.1	Gm49477	154.439	1.72904	0.335247	1.57948e-08	7.69322e-07	3.31507	1
ENSMUSG00000109446.1	Gm9195	29.3764	6.91232	1.39548	1.74518e-08	8.38126e-07	120.453	1
ENSMUSG00000037613.16	Tnfrsf23	491.239	1.42981	0.278542	2.1391e-08	1.00755e-06	2.69411	1
ENSMUSG00000071517.6	Gm10334	105.345	2.76595	0.550676	2.57032e-08	1.18145e-06	6.80195	1
ENSMUSG00000010492.10	Uckl1os	90.9517	1.97876	0.394318	2.78482e-08	1.26983e-06	3.94154	1
ENSMUSG00000023904.10	Hcfc1r1	920.96	0.871918	0.167728	2.90255e-08	1.31304e-06	1.83009	1
ENSMUSG00000032231.14	Anxa2	757.294	1.22786	0.240547	2.92903e-08	1.32153e-06	2.3422	1
ENSMUSG00000028584.3	Lrrc38	75.6186	2.64683	0.530093	3.01631e-08	1.35734e-06	6.26291	1
ENSMUSG00000022551.8	Cyc1	1530.67	1.13761	0.223973	3.65984e-08	1.62492e-06	2.20017	1
ENSMUSG00000041774.16	Ydjc	240.568	1.24411	0.247845	4.43643e-08	1.93544e-06	2.36872	1
ENSMUSG00000038463.8	Olfml2b	362.934	1.05855	0.209621	4.75138e-08	2.05349e-06	2.08283	1
ENSMUSG00000084128.10	Esrp2	271.035	1.11002	0.221131	5.09959e-08	2.19129e-06	2.15848	1
ENSMUSG00000030911.7	Zp2	173.229	2.09056	0.427933	5.16832e-08	2.20483e-06	4.25914	1
ENSMUSG00000039419.17	Cntnap2	1817.67	1.52231	0.309249	5.93636e-08	2.51306e-06	2.87251	1
ENSMUSG00000016194.14	Hsd11b1	40.1437	2.2529	0.461296	6.08512e-08	2.55084e-06	4.76641	1
ENSMUSG00000021700.10	Rab3c	650.348	1.01286	0.202594	6.47977e-08	2.6965e-06	2.01791	1
ENSMUSG00000040274.11	Cdk6	145.132	1.41306	0.287962	6.63006e-08	2.75236e-06	2.663	1
ENSMUSG00000026840.14	Lamc3	70.7762	2.00895	0.412223	6.77236e-08	2.79788e-06	4.02488	1
ENSMUSG00000029830.15	Svopl	145.302	1.54181	0.315515	6.75999e-08	2.79788e-06	2.91159	1
ENSMUSG00000041992.9	Rapgef5	461.152	0.978532	0.195638	6.7944e-08	2.80024e-06	1.97046	1
ENSMUSG00000030054.4	Gp9	25.1546	3.73207	0.763722	6.90891e-08	2.84061e-06	13.2882	1
ENSMUSG00000018774.13	Cd68	105.718	1.48176	0.303335	7.50735e-08	3.05008e-06	2.7929	1
ENSMUSG00000023914.16	Mep1a	23.4972	3.24393	0.667244	8.25844e-08	3.32373e-06	9.4737	1
ENSMUSG00000110353.1	Gm33543	23.3236	3.38033	0.699403	9.0032e-08	3.59813e-06	10.4132	1
ENSMUSG00000025665.16	Rps6ka6	227.158	1.4756	0.304963	9.54245e-08	3.78716e-06	2.78099	1
ENSMUSG00000037736.20	Limch1	900.159	0.957868	0.195047	1.12295e-07	4.37567e-06	1.94244	1
ENSMUSG00000041559.7	Fmod	20.705	4.61687	0.943022	1.37241e-07	5.29956e-06	24.5367	1
ENSMUSG00000019494.14	Cops6	1249.44	0.800778	0.16308	1.47905e-07	5.66034e-06	1.74204	1
ENSMUSG00000115426.1	Gm19510	24.5993	3.05691	0.648816	1.51545e-07	5.77385e-06	8.32191	1
ENSMUSG00000042215.8	Bag2	754.361	1.43535	0.303196	1.58911e-07	6.02773e-06	2.70447	1
ENSMUSG00000056494.7	Cngb3	75.3038	1.73486	0.368587	1.61193e-07	6.10079e-06	3.32847	1
ENSMUSG00000023353.14	Agap3	1967	0.768004	0.156669	1.72346e-07	6.50851e-06	1.70291	1
ENSMUSG00000054555.11	Adam12	226.18	1.38167	0.293086	1.83986e-07	6.93282e-06	2.60569	1
ENSMUSG00000039556.16	Ppp1r3f	292.492	1.07472	0.225155	1.87858e-07	7.04778e-06	2.10631	1
ENSMUSG00000040111.17	Gramd1b	626.632	1.04702	0.219417	1.93504e-07	7.22891e-06	2.06626	1
ENSMUSG00000029090.12	Adgra3	498.939	1.16892	0.247259	2.02607e-07	7.53514e-06	2.24843	1
ENSMUSG00000036766.12	Dner	854.817	1.56185	0.334842	2.08436e-07	7.73515e-06	2.95233	1
ENSMUSG00000035934.16	Pknox2	68.8231	1.63618	0.35107	2.11414e-07	7.82871e-06	3.10842	1
ENSMUSG00000028048.11	Gba	1127.83	0.813169	0.16843	2.21607e-07	8.15602e-06	1.75707	1
ENSMUSG00000050335.17	Lgals3	60.662	1.85756	0.401647	2.2168e-07	8.15602e-06	3.62394	1
ENSMUSG00000042115.4	Klhdc8a	92.3324	1.58754	0.341502	2.25236e-07	8.26911e-06	3.00536	1
ENSMUSG00000030630.16	Fah	324.416	1.0583	0.224271	2.44104e-07	8.90461e-06	2.08248	1
ENSMUSG00000031239.5	Itm2a	269.048	1.24495	0.268149	2.92789e-07	1.05311e-05	2.37011	1
ENSMUSG00000027605.18	Acss2	1250.05	1.15732	0.248911	3.1083e-07	1.11257e-05	2.23042	1
ENSMUSG00000030189.15	Ybx3	2078.09	1.1417	0.245553	3.1314e-07	1.1185e-05	2.20641	1
ENSMUSG00000038600.12	Atp6v0a4	18.073	3.67614	0.812521	3.18163e-07	1.12938e-05	12.7829	1
ENSMUSG00000017165.1	Gast	35.596	2.17165	0.479618	3.45217e-07	1.21535e-05	4.50537	1
ENSMUSG00000048776.8	Pthlh	115.231	1.59388	0.350749	3.62583e-07	1.27387e-05	3.01861	1
ENSMUSG00000021207.9	Akr1c21	18.748	3.36272	0.742125	3.7967e-07	1.32575e-05	10.2868	1
ENSMUSG00000036103.9	Colec12	125.347	1.38343	0.303145	3.82479e-07	1.33285e-05	2.60888	1
ENSMUSG00000017057.9	Il13ra1	878.425	0.948775	0.204053	4.03769e-07	1.39851e-05	1.93023	1
ENSMUSG00000025260.10	Hsd17b10	631.282	0.999231	0.216104	4.30242e-07	1.48421e-05	1.99893	1
ENSMUSG00000039178.9	Tbc1d19	1122.77	0.914528	0.197086	4.4473e-07	1.52194e-05	1.88495	1
ENSMUSG00000034796.14	Cpne7	46.5419	2.27524	0.51395	4.72966e-07	1.60574e-05	4.84078	1
ENSMUSG00000030247.9	Kcnj8	95.5889	1.74012	0.392447	5.61882e-07	1.87422e-05	3.34064	1
ENSMUSG00000025875.14	Tspan17	554.51	1.03627	0.227958	5.79474e-07	1.9254e-05	2.05092	1
ENSMUSG00000001119.7	Col6a1	858.058	1.17908	0.261796	6.00606e-07	1.98239e-05	2.26433	1
ENSMUSG00000067377.12	Tspan6	156.14	1.28372	0.28758	6.25598e-07	2.05871e-05	2.43466	1
ENSMUSG00000028125.14	Abca4	191.078	1.20368	0.268485	6.40208e-07	2.09473e-05	2.30326	1
ENSMUSG00000042671.12	Rgs8	111.791	1.48879	0.335933	6.55646e-07	2.13708e-05	2.80654	1
ENSMUSG00000030220.13	Arhgdib	102.026	1.42301	0.322001	7.11758e-07	2.30956e-05	2.68145	1
ENSMUSG00000066607.5	Insyn1	66.2689	1.68058	0.383014	7.19787e-07	2.31969e-05	3.20557	1
ENSMUSG00000023175.15	Bsg	15084.9	0.785571	0.171052	7.23858e-07	2.32843e-05	1.72377	1
ENSMUSG00000029231.15	Pdgfra	75.3058	1.93803	0.445597	7.34686e-07	2.35884e-05	3.83183	1
ENSMUSG00000025069.15	Gsto2	164.518	1.15575	0.259309	7.57386e-07	2.42265e-05	2.228	1
ENSMUSG00000055116.8	Arntl	150.921	1.6643	0.380752	7.56956e-07	2.42265e-05	3.1696	1
ENSMUSG00000022790.14	Igsf11	232.665	1.08489	0.242294	7.59348e-07	2.4244e-05	2.12121	1
ENSMUSG00000027316.15	Gfra4	79.1207	1.55703	0.355826	8.07144e-07	2.56268e-05	2.94247	1
ENSMUSG00000021418.15	Rpp40	134.544	1.46716	0.334934	8.14056e-07	2.57985e-05	2.76478	1
ENSMUSG00000034771.15	Tle2	751.505	1.13848	0.257256	8.87345e-07	2.80693e-05	2.2015	1
ENSMUSG00000068220.6	Lgals1	482.373	1.71761	0.39657	8.9154e-07	2.815e-05	3.2889	1
ENSMUSG00000025630.8	Hprt	3104.79	0.778921	0.171105	8.94695e-07	2.81977e-05	1.71585	1
ENSMUSG00000000489.7	Pdgfb	468.061	1.01987	0.22879	9.06497e-07	2.8465e-05	2.02773	1
ENSMUSG00000020052.9	Ascl1	61.4994	1.94851	0.451149	9.234e-07	2.89428e-05	3.85977	1
ENSMUSG00000087196.1	Gm13373	32.0259	3.87374	0.905093	9.6598e-07	3.00576e-05	14.6593	1
ENSMUSG00000042604.5	Kcna4	41.2461	2.40546	0.566816	1.181e-06	3.63525e-05	5.29806	1
ENSMUSG00000021710.11	Nln	372.182	0.870172	0.196221	1.28533e-06	3.94222e-05	1.82788	1
ENSMUSG00000020623.11	Map2k6	122.563	1.24837	0.289009	1.30043e-06	3.95317e-05	2.37574	1
ENSMUSG00000030849.18	Fgfr2	86.4521	1.37888	0.320472	1.29689e-06	3.95317e-05	2.60067	1
ENSMUSG00000030249.15	Abcc9	503.128	1.33158	0.309452	1.30552e-06	3.96163e-05	2.51678	1
ENSMUSG00000025492.6	Ifitm3	523.407	1.0086	0.230298	1.31143e-06	3.97252e-05	2.01196	1
ENSMUSG00000037716.15	Ccdc33	26.2476	2.67278	0.634388	1.37597e-06	4.14606e-05	6.37658	1
ENSMUSG00000036192.15	Rorb	20.395	3.26964	0.775909	1.38224e-06	4.15763e-05	9.64403	1
ENSMUSG00000022300.10	Dcaf13	1210.69	0.740795	0.165542	1.39862e-06	4.19953e-05	1.6711	1
ENSMUSG00000026737.12	Pip4k2a	986.035	0.707915	0.157612	1.40466e-06	4.2103e-05	1.63344	1
ENSMUSG00000063275.15	Hacd1	158.253	1.25982	0.293739	1.45859e-06	4.3608e-05	2.39466	1
ENSMUSG00000070424.12	Art5	20.155	3.58315	0.847132	1.45996e-06	4.3608e-05	11.9849	1
ENSMUSG00000045349.15	Sh2d5	303.657	0.963462	0.220478	1.47518e-06	4.3986e-05	1.94998	1
ENSMUSG00000066755.2	Tnfsf18	10.776	7.18051	2.70803	1.52029e-06	4.52525e-05	145.061	1
ENSMUSG00000029695.13	Aass	190.227	2.1411	0.513573	1.54991e-06	4.6054e-05	4.41099	1
ENSMUSG00000045868.12	Gvin1	461.545	1.19772	0.279363	1.56364e-06	4.63015e-05	2.29377	1
ENSMUSG00000002885.14	Adgre5	468.749	0.910568	0.208386	1.58665e-06	4.6902e-05	1.87979	1
ENSMUSG00000044502.16	Bod1	1247.11	0.808411	0.18325	1.59862e-06	4.71745e-05	1.75128	1
ENSMUSG00000034990.15	Otoa	619.932	1.33666	0.314425	1.60908e-06	4.74014e-05	2.52567	1
ENSMUSG00000024781.16	Lipa	369.978	0.856104	0.195093	1.63688e-06	4.81376e-05	1.81014	1
ENSMUSG00000073987.4	Ggh	748.364	0.808649	0.183503	1.64568e-06	4.83136e-05	1.75157	1
ENSMUSG00000070371.11	Prss36	200.126	1.21486	0.285226	1.70006e-06	4.94864e-05	2.32119	1
ENSMUSG00000060802.8	B2m	2042.79	0.722379	0.162784	1.70326e-06	4.94955e-05	1.6499	1
ENSMUSG00000041801.5	Phlda3	148.454	1.17411	0.274821	1.70814e-06	4.95535e-05	2.25654	1
ENSMUSG00000068245.14	Phf11d	113.975	1.36735	0.323273	1.71362e-06	4.96283e-05	2.57997	1
ENSMUSG00000044976.17	Wdr72	26.2464	3.04281	0.749439	1.7561e-06	5.06021e-05	8.24097	1
ENSMUSG00000020396.8	Nefh	208.348	1.25792	0.296532	1.83014e-06	5.26472e-05	2.39151	1
ENSMUSG00000075478.3	Slitrk1	96.1166	2.20494	0.534692	1.83882e-06	5.27201e-05	4.61055	1
ENSMUSG00000019139.10	Isyna1	854.193	0.856122	0.196483	1.86678e-06	5.33433e-05	1.81017	1
ENSMUSG00000030605.15	Mfge8	1156.61	0.758526	0.172302	1.87929e-06	5.36113e-05	1.69176	1
ENSMUSG00000020037.15	Rfx4	26.5671	2.45027	0.592967	1.95827e-06	5.57718e-05	5.46517	1
ENSMUSG00000061762.12	Tac1	263.846	1.99908	0.485097	1.99243e-06	5.66504e-05	3.99744	1
ENSMUSG00000039629.14	Strip2	168.33	1.36921	0.326411	2.02413e-06	5.74565e-05	2.58329	1
ENSMUSG00000074505.6	Fat3	55.572	1.96455	0.476227	2.10321e-06	5.95041e-05	3.9029	1
ENSMUSG00000115219.2	Eef1akmt4	103.617	1.35595	0.324022	2.11978e-06	5.98742e-05	2.55965	1
ENSMUSG00000015806.12	Qdpr	3784.99	0.804173	0.184983	2.17414e-06	6.10075e-05	1.74614	1
ENSMUSG00000020810.5	Cygb	370.545	1.10029	0.260287	2.28766e-06	6.35688e-05	2.14398	1
ENSMUSG00000021823.10	Vcl	941.552	1.12742	0.26733	2.30977e-06	6.40792e-05	2.18467	1
ENSMUSG00000032135.15	Mcam	1278.89	1.18356	0.28305	2.54864e-06	7.01388e-05	2.27136	1
ENSMUSG00000050711.7	Scg2	152036	0.671974	0.150364	2.57016e-06	7.06177e-05	1.59325	1
ENSMUSG00000021196.14	Pfkp	770.26	0.856242	0.200528	2.77413e-06	7.58573e-05	1.81032	1
ENSMUSG00000016494.9	Cd34	1221.76	1.01548	0.24171	2.86222e-06	7.74019e-05	2.02157	1
ENSMUSG00000046442.4	Ppm1e	438.875	1.52244	0.374028	3.05228e-06	8.13864e-05	2.87276	1
ENSMUSG00000037855.15	Zfp365	401.558	1.2729	0.309209	3.07308e-06	8.18135e-05	2.41646	1
ENSMUSG00000025170.13	Rab40b	232.435	1.09952	0.26471	3.09142e-06	8.21742e-05	2.14283	1
ENSMUSG00000056367.14	Actr3b	163.107	1.10736	0.266774	3.15805e-06	8.36859e-05	2.15451	1
ENSMUSG00000030222.13	Rerg	137.791	1.7986	0.446384	3.25329e-06	8.58118e-05	3.47881	1
ENSMUSG00000029819.6	Npy	417.076	1.56829	0.387462	3.28189e-06	8.63006e-05	2.96552	1
ENSMUSG00000035620.15	Ric8b	2015.38	0.703215	0.163301	3.29096e-06	8.64065e-05	1.62813	1
ENSMUSG00000039405.7	Prss23	652.669	0.961063	0.229963	3.42182e-06	8.91598e-05	1.94674	1
ENSMUSG00000050370.5	Ch25h	29.9446	2.5587	0.641896	3.46955e-06	9.01294e-05	5.89176	1
ENSMUSG00000040270.16	Bach2	103.814	1.47274	0.363914	3.52511e-06	9.11584e-05	2.77548	1
ENSMUSG00000071604.5	Fam189a2	177.694	1.27157	0.311744	3.61834e-06	9.31479e-05	2.41424	1
ENSMUSG00000095937.1	Gm12671	1611.44	0.895421	0.213675	3.68825e-06	9.48051e-05	1.86015	1
ENSMUSG00000018411.17	Mapt	1584.37	1.02641	0.248506	3.84122e-06	9.84419e-05	2.03696	1
ENSMUSG00000071014.10	Ndufb6	1079.81	0.949281	0.228651	3.90192e-06	9.98484e-05	1.93091	1
ENSMUSG00000030409.16	Dmpk	1181.81	0.903425	0.217474	4.19385e-06	0.000106524	1.8705	1
ENSMUSG00000000753.15	Serpinf1	76.203	1.6095	0.403318	4.35525e-06	0.000110134	3.05146	1
ENSMUSG00000026014.15	Raph1	461.649	1.37915	0.3445	4.37699e-06	0.000110521	2.60115	1
ENSMUSG00000033510.14	Otud7a	236.389	1.17479	0.291041	4.66744e-06	0.000117681	2.2576	1
ENSMUSG00000027961.7	Lrrc39	35.5302	2.87201	0.739226	4.8139e-06	0.000121196	7.32082	1
ENSMUSG00000067276.5	Capn6	30.1047	2.15891	0.553815	5.30476e-06	0.000132387	4.46577	1
ENSMUSG00000016427.7	Ndufa1	2397.5	0.813139	0.196513	5.33124e-06	0.000132855	1.75703	1
ENSMUSG00000003072.15	Atp5d	2324.85	0.680426	0.162098	5.64162e-06	0.000139374	1.60261	1
ENSMUSG00000107271.3	BC028471	17.694	5.0764	1.21592	5.66705e-06	0.000139801	33.7402	1
ENSMUSG00000025545.10	Clybl	170.239	1.0396	0.258356	5.89032e-06	0.000144477	2.05566	1
ENSMUSG00000085077.1	1700049E15Rik	41.6922	2.49668	0.655906	5.97662e-06	0.000146176	5.64384	1
ENSMUSG00000023905.15	Tnfrsf12a	331.968	1.39481	0.355151	6.0084e-06	0.000146744	2.62954	1
ENSMUSG00000037060.3	Cavin3	281.705	1.1201	0.280759	6.0261e-06	0.000146967	2.17362	1
ENSMUSG00000026656.15	Fcgr2b	52.2768	1.46409	0.373007	6.08959e-06	0.000148304	2.75889	1
ENSMUSG00000085328.2	Gm17131	35.6163	1.92125	0.496625	6.11775e-06	0.000148778	3.78751	1
ENSMUSG00000029309.7	Sparcl1	3318.58	0.959677	0.237612	6.23326e-06	0.000151373	1.94488	1
ENSMUSG00000037032.16	Apbb1	2336.61	0.893675	0.21982	6.26418e-06	0.000151909	1.8579	1
ENSMUSG00000028111.4	Ctsk	74.6971	1.34549	0.342271	6.33599e-06	0.000153433	2.54117	1
ENSMUSG00000090223.2	Pcp4	178.225	1.21839	0.308048	6.38477e-06	0.000154396	2.32687	1
ENSMUSG00000040694.4	Apobec2	81.7217	1.94313	0.508351	6.86683e-06	0.00016489	3.84538	1
ENSMUSG00000034472.13	Rasd2	63.115	1.5302	0.396748	7.55064e-06	0.000179302	2.88827	1
ENSMUSG00000036256.13	Igfbp7	8170.19	0.719437	0.174975	7.5412e-06	0.000179302	1.64654	1
ENSMUSG00000028020.16	Glrb	1269.07	1.16672	0.298844	8.16458e-06	0.000191232	2.245	1
ENSMUSG00000113940.1	Gm40477	34.426	2.48731	0.661401	8.35044e-06	0.000195318	5.60732	1
ENSMUSG00000029030.14	Tprgl	2405.64	0.681897	0.166447	8.67901e-06	0.000202451	1.60425	1
ENSMUSG00000085926.1	Gm12299	52.112	1.8348	0.487372	9.02672e-06	0.000210276	3.56722	1
ENSMUSG00000104234.1	5330439B14Rik	48.0027	2.36638	0.636276	9.2506e-06	0.000214907	5.15647	1
ENSMUSG00000006476.19	Nsmf	1127.68	0.79744	0.199149	9.68066e-06	0.000223686	1.73801	1
ENSMUSG00000025044.16	Msr1	12.7594	3.55676	0.965928	9.90837e-06	0.000228639	11.7677	1
ENSMUSG00000027078.14	Ube2l6	399.403	0.885399	0.223942	9.97892e-06	0.000229958	1.84727	1
ENSMUSG00000096257.2	Ccer2	15.2739	3.47606	0.918532	1.06721e-05	0.000245127	11.1275	1
ENSMUSG00000061603.8	Akap6	607.538	0.894019	0.227182	1.07513e-05	0.000246431	1.85835	1
ENSMUSG00000060032.6	H2aj	569.343	1.01471	0.261931	1.10511e-05	0.000252293	2.0205	1
ENSMUSG00000030075.10	Cntn3	145.021	0.984823	0.253364	1.11286e-05	0.000253724	1.97907	1
ENSMUSG00000062751.5	Prss1	26.7222	2.88483	0.786622	1.18293e-05	0.000268273	7.38618	1
ENSMUSG00000030652.11	Coq7	440.806	0.858541	0.219425	1.26418e-05	0.000284441	1.8132	1
ENSMUSG00000041482.17	Piezo2	436.633	0.834707	0.21303	1.29107e-05	0.000288973	1.7835	1
ENSMUSG00000107167.3	Gm34653	13.1253	4.75977	1.18331	1.31582e-05	0.000292983	27.0915	1
ENSMUSG00000098128.1	Gm3693	13.3688	4.77621	1.19437	1.38155e-05	0.000307078	27.402	1
ENSMUSG00000074643.12	Cpne1	554.625	0.749217	0.190076	1.40124e-05	0.000310793	1.68088	1
ENSMUSG00000064293.14	Cntn4	47.3245	2.5054	0.698943	1.42212e-05	0.000314609	5.67806	1
ENSMUSG00000073856.11	Iqck	73.7749	1.45414	0.395302	1.49827e-05	0.000330602	2.73993	1
ENSMUSG00000033083.16	Tbc1d4	461.701	0.944304	0.246802	1.52493e-05	0.000335192	1.92426	1
ENSMUSG00000032925.16	Itgbl1	37.9264	1.90294	0.523534	1.55419e-05	0.000341185	3.73975	1
ENSMUSG00000079516.2	Reg3a	287.19	1.88724	0.522657	1.59459e-05	0.00034827	3.69928	1
ENSMUSG00000022013.4	Dnajc15	562.915	0.767234	0.197608	1.70085e-05	0.000369596	1.702	1
ENSMUSG00000026204.15	Ptprn	14190.2	0.631806	0.160011	1.70755e-05	0.000370581	1.5495	1
ENSMUSG00000001313.12	Rnd2	205.11	0.886087	0.231861	1.71147e-05	0.000370963	1.84816	1
ENSMUSG00000021460.17	Auh	1425.09	0.747533	0.192465	1.75971e-05	0.000380229	1.67892	1
ENSMUSG00000047867.11	Gimap6	614.338	0.803138	0.208334	1.75842e-05	0.000380229	1.74489	1
ENSMUSG00000020241.13	Col6a2	868.895	1.17369	0.317276	1.82172e-05	0.000390418	2.25588	1
ENSMUSG00000041949.6	Tango6	222.191	0.811232	0.211007	1.82652e-05	0.000390957	1.75471	1
ENSMUSG00000000530.16	Acvrl1	544.298	0.717589	0.1844	1.8713e-05	0.000400042	1.64443	1
ENSMUSG00000036510.17	Cdh8	1953.91	0.75976	0.196658	1.88359e-05	0.000402169	1.69321	1
ENSMUSG00000024538.8	Ppic	293.435	1.0778	0.290179	1.92543e-05	0.000409064	2.11081	1
ENSMUSG00000033475.15	Tomm6	1060.16	0.624271	0.158496	1.93157e-05	0.00040986	1.54143	1
ENSMUSG00000029167.13	Ppargc1a	134.219	1.88499	0.530338	1.94386e-05	0.000411958	3.69349	1
ENSMUSG00000009013.5	Dynll1	1584.86	0.997246	0.266714	1.96095e-05	0.000414705	1.99619	1
ENSMUSG00000038811.13	Gngt2	78.3532	1.19559	0.325328	1.96165e-05	0.000414705	2.29039	1
ENSMUSG00000025650.13	Col7a1	49	1.85755	0.526296	2.04205e-05	0.00043011	3.62392	1
ENSMUSG00000028047.11	Thbs3	696.562	0.66027	0.169099	2.05247e-05	0.000431245	1.58038	1
ENSMUSG00000043972.8	Opn5	7.52705	6.40391	2.69798	2.07267e-05	0.000434956	84.6775	1
ENSMUSG00000044080.9	S100a1	852.344	0.932501	0.248814	2.09412e-05	0.000438919	1.90858	1
ENSMUSG00000020695.14	Mrc2	94.2139	1.55802	0.435738	2.10761e-05	0.000441208	2.94449	1
ENSMUSG00000078636.4	Gm7336	3669.78	0.579156	0.146851	2.20698e-05	0.000460885	1.49397	1
ENSMUSG00000041420.18	Meis3	1386.17	0.933519	0.250081	2.21901e-05	0.000462834	1.90993	1
ENSMUSG00000027195.10	Hsd17b12	2829.21	0.953764	0.256598	2.3023e-05	0.000479041	1.93692	1
ENSMUSG00000021806.4	Nid2	1110.15	0.904523	0.242315	2.30801e-05	0.000479647	1.87193	1
ENSMUSG00000031253.15	Srpx2	36.9836	1.77129	0.500219	2.31686e-05	0.000480321	3.41358	1
ENSMUSG00000039997.16	Ifi203	337.157	0.773177	0.204026	2.44047e-05	0.000503512	1.70903	1
ENSMUSG00000023886.10	Smoc2	28.8326	2.09545	0.600451	2.51309e-05	0.00051663	4.27359	1
ENSMUSG00000045672.15	Col27a1	600.718	1.15524	0.320125	2.54448e-05	0.000521832	2.22721	1
ENSMUSG00000045404.16	Kcnk13	40.3106	1.6727	0.476787	2.60379e-05	0.000532721	3.18811	1
ENSMUSG00000036913.15	Trim67	190.021	1.07316	0.295114	2.63074e-05	0.000537594	2.10403	1
ENSMUSG00000020843.15	Timm22	426.444	0.908806	0.246297	2.70192e-05	0.000551429	1.87749	1
ENSMUSG00000021647.7	Cartpt	132.125	1.62647	0.465628	2.75691e-05	0.000561367	3.08757	1
ENSMUSG00000041697.8	Cox6a1	2343.02	0.850371	0.228975	2.79205e-05	0.000565894	1.80296	1
ENSMUSG00000046500.8	Tafa4	14.9954	3.19454	0.913355	2.80588e-05	0.000567967	9.15486	1
ENSMUSG00000025035.9	Arl3	1484.16	0.585296	0.150916	2.82408e-05	0.000570978	1.50035	1
ENSMUSG00000032281.11	Acsbg1	46.0181	1.49708	0.429715	3.00603e-05	0.000604089	2.8227	1
ENSMUSG00000117485.1	Gm19696	12.9886	2.99738	0.883916	3.30391e-05	0.000657904	7.9855	1
ENSMUSG00000025082.8	Vwa2	28.4024	1.82307	0.530652	3.31069e-05	0.00065849	3.53834	1
ENSMUSG00000000088.7	Cox5a	733.536	0.685371	0.182056	3.34882e-05	0.000664532	1.60812	1
ENSMUSG00000022548.14	Apod	242.896	1.00828	0.281086	3.45195e-05	0.000684204	2.01152	1
ENSMUSG00000009687.14	Fxyd5	206.867	0.922371	0.254933	3.4685e-05	0.000685899	1.89523	1
ENSMUSG00000036218.16	Pdzrn4	183.181	1.3424	0.38558	3.46829e-05	0.000685899	2.53572	1
ENSMUSG00000006576.16	Slc4a3	1138.26	0.708897	0.190736	3.79237e-05	0.00073854	1.63455	1
ENSMUSG00000026399.12	Cd55	99.0529	1.41928	0.412513	3.79501e-05	0.00073854	2.67452	1
ENSMUSG00000037907.16	Ankrd13b	494.008	0.702224	0.189083	3.91297e-05	0.000757199	1.62701	1
ENSMUSG00000027955.16	Gask1b	164.847	1.31716	0.382189	4.04224e-05	0.000781332	2.49175	1
ENSMUSG00000090237.1	Gm16308	12.7304	4.06387	1.16116	4.11491e-05	0.000789151	16.7242	1
ENSMUSG00000025068.8	Gsto1	361.933	1.01634	0.287893	4.16068e-05	0.000796148	2.02277	1
ENSMUSG00000024503.3	Spink1	192.241	1.93474	0.581567	4.19818e-05	0.000802429	3.82308	1
ENSMUSG00000026478.14	Lamc1	3310.51	0.804231	0.221537	4.29513e-05	0.000820044	1.74621	1
ENSMUSG00000050147.9	F2rl3	41.4907	1.7544	0.522685	4.32912e-05	0.000824697	3.37386	1
ENSMUSG00000032946.16	Rasgrp2	108.631	1.32737	0.388398	4.34138e-05	0.000825392	2.50945	1
ENSMUSG00000058806.15	Col13a1	640.488	0.696963	0.189075	4.41526e-05	0.000837386	1.62109	1
ENSMUSG00000036613.8	Eipr1	408.027	0.719173	0.196312	4.53413e-05	0.0008552	1.64624	1
ENSMUSG00000045160.14	Bola3	582.441	0.793604	0.219645	4.54635e-05	0.000855622	1.7334	1
ENSMUSG00000032380.9	Dapk2	29.0669	1.82187	0.5466	4.69698e-05	0.000883002	3.5354	1
ENSMUSG00000005089.15	Slc1a2	9.90371	5.09039	1.59335	4.75381e-05	0.00089173	34.0689	1
ENSMUSG00000059355.13	Wdr83os	642.787	0.627417	0.1689	4.78999e-05	0.000897533	1.5448	1
ENSMUSG00000033032.15	Afap1l1	324.034	0.715732	0.19601	4.81245e-05	0.000899776	1.64232	1
ENSMUSG00000000031.16	H19	17.9072	2.53719	0.751836	4.93596e-05	0.000918471	5.80458	1
ENSMUSG00000032294.17	Pkm	18641	0.569034	0.151652	4.93912e-05	0.000918471	1.48353	1
ENSMUSG00000031671.11	Setd6	344.189	0.765923	0.212181	4.94851e-05	0.000919201	1.70046	1
ENSMUSG00000037108.13	Zcwpw1	104.034	1.11076	0.322873	5.0561e-05	0.000934126	2.15959	1
ENSMUSG00000029718.14	Pcolce	257.919	1.21203	0.356034	5.15884e-05	0.000950036	2.31664	1
ENSMUSG00000002489.16	Tiam1	340.063	1.03151	0.298505	5.2121e-05	0.000956761	2.04417	1
ENSMUSG00000024067.14	Dpy30	809.517	0.882632	0.249999	5.21063e-05	0.000956761	1.84374	1
ENSMUSG00000030647.8	Ndufc2	1968.87	0.838911	0.236051	5.22557e-05	0.000957184	1.7887	1
ENSMUSG00000031875.7	Cmtm3	158.182	1.08947	0.317287	5.3347e-05	0.000974052	2.12796	1
ENSMUSG00000032279.11	Idh3a	1486.57	0.68626	0.188366	5.3872e-05	0.00098259	1.60911	1
ENSMUSG00000035960.14	Apex1	467.259	0.841905	0.237645	5.42431e-05	0.000987259	1.79242	1
ENSMUSG00000027613.15	Eif6	1159.41	0.659763	0.181074	5.73529e-05	0.00103945	1.57982	1
ENSMUSG00000090254.7	Gm1965	9.54604	4.86879	1.51585	5.7585e-05	0.00104255	29.2181	1
ENSMUSG00000028488.15	Sh3gl2	922.594	0.730371	0.203225	5.77801e-05	0.00104498	1.65907	1
ENSMUSG00000036273.15	Lrrk2	222.848	1.16586	0.345216	5.86385e-05	0.00105716	2.24367	1
ENSMUSG00000071521.4	Try10	190.588	1.74893	0.537212	5.92487e-05	0.00106704	3.36109	1
ENSMUSG00000031825.16	Crispld2	86.4581	1.41664	0.42666	5.94014e-05	0.00106867	2.66962	1
ENSMUSG00000027406.13	Idh3b	1858.66	0.595045	0.161458	5.97561e-05	0.00107392	1.51052	1
ENSMUSG00000036751.7	Cox6b1	2040.83	0.634602	0.173947	6.06374e-05	0.00108862	1.55251	1
ENSMUSG00000031673.6	Cdh11	72.4038	1.79596	0.554126	6.12339e-05	0.00109817	3.47246	1
ENSMUSG00000090137.8	Uba52	1105.49	0.624655	0.171258	6.24336e-05	0.00111852	1.54184	1
ENSMUSG00000000884.17	Gnb1l	186.586	1.08623	0.321065	6.31934e-05	0.00112977	2.12318	1
ENSMUSG00000050666.14	Vstm4	100.386	1.16139	0.345441	6.33484e-05	0.00113136	2.23673	1
ENSMUSG00000016262.14	Sertad4	320.201	0.825541	0.235267	6.38769e-05	0.00113725	1.7722	1
ENSMUSG00000021548.10	Ccnh	797.585	0.726941	0.203673	6.38619e-05	0.00113725	1.65513	1
ENSMUSG00000028776.14	Tinagl1	543.974	1.0476	0.308236	6.41067e-05	0.00114015	2.06709	1
ENSMUSG00000048960.13	Prex2	511.304	0.853296	0.244649	6.54079e-05	0.00116089	1.80662	1
ENSMUSG00000042099.16	Kank3	245.358	1.01448	0.297929	6.55355e-05	0.00116195	2.02017	1
ENSMUSG00000086044.1	A330043C09Rik	11.586	3.5319	1.06463	6.62485e-05	0.00117096	11.5667	1
ENSMUSG00000033152.13	Podxl2	1072.3	0.722736	0.202935	6.64636e-05	0.00117355	1.65031	1
ENSMUSG00000034520.14	Gjc1	151.514	1.05345	0.311338	6.7717e-05	0.00119262	2.07548	1
ENSMUSG00000048332.13	Lhfp	338.22	0.78017	0.221812	6.82018e-05	0.0011993	1.71733	1
ENSMUSG00000100837.7	1700063D05Rik	17.1063	2.43177	0.770923	6.91354e-05	0.00121199	5.39555	1
ENSMUSG00000025287.15	Acot9	181.365	0.880854	0.254819	6.9421e-05	0.00121575	1.84147	1
ENSMUSG00000031384.2	Asb9	31.2138	1.57721	0.485565	6.95001e-05	0.0012159	2.98391	1
ENSMUSG00000027610.17	Gss	459.741	0.662328	0.18457	7.01372e-05	0.00122579	1.58263	1
ENSMUSG00000030505.17	Prmt3	325.742	0.701974	0.197302	7.09338e-05	0.00123719	1.62673	1
ENSMUSG00000001029.15	Icam2	182.488	0.893127	0.25967	7.11148e-05	0.00123909	1.8572	1
ENSMUSG00000033854.10	Kcnk10	36.7972	1.68069	0.524857	7.15578e-05	0.00124428	3.2058	1
ENSMUSG00000031787.8	Katnb1	470.212	0.696218	0.195904	7.28784e-05	0.00126468	1.62025	1
ENSMUSG00000032577.16	Mapkapk3	317.126	1.43559	0.443793	7.38428e-05	0.00128012	2.70493	1
ENSMUSG00000026712.3	Mrc1	41.5592	1.69063	0.526734	7.47422e-05	0.0012944	3.22798	1
ENSMUSG00000075704.16	Txnrd2	360.896	0.872525	0.25441	7.5909e-05	0.00131063	1.83086	1
ENSMUSG00000039628.9	Hs3st6	581.251	0.862016	0.250786	7.61323e-05	0.00131317	1.81758	1
ENSMUSG00000028085.12	Gatb	310.582	0.760812	0.21778	7.7085e-05	0.00132826	1.69444	1
ENSMUSG00000061518.11	Cox5b	1868.93	0.76844	0.220438	7.84528e-05	0.00135048	1.70343	1
ENSMUSG00000021496.12	Pcbd2	342.623	0.770245	0.221553	8.02301e-05	0.00137555	1.70556	1
ENSMUSG00000108687.1	Gm45007	15.6908	2.55384	0.810258	8.19502e-05	0.00140083	5.87195	1
ENSMUSG00000020717.19	Pecam1	2277.22	0.796883	0.230605	8.22303e-05	0.00140422	1.73734	1
ENSMUSG00000040824.3	Snrpd2	1333.4	0.739676	0.212498	8.52785e-05	0.00145483	1.6698	1
ENSMUSG00000109029.1	Gm44717	47.0027	1.96427	0.631812	8.56536e-05	0.00145977	3.90216	1
ENSMUSG00000022370.13	Mrpl13	606.047	0.67031	0.190022	8.59635e-05	0.00146094	1.59141	1
ENSMUSG00000040086.13	Tnni3k	16.4127	2.56103	0.819998	8.59777e-05	0.00146094	5.90129	1
ENSMUSG00000026728.9	Vim	1553.31	1.16092	0.356637	8.88442e-05	0.00150815	2.236	1
ENSMUSG00000002379.7	Ndufa11	1188.23	0.901073	0.267372	8.97358e-05	0.00152082	1.86745	1
ENSMUSG00000035559.9	Mpv17l2	226.378	0.858794	0.253191	8.97681e-05	0.00152082	1.81352	1
ENSMUSG00000044533.15	Rps2	12283.5	0.5014	0.136058	8.98581e-05	0.00152085	1.41559	1
ENSMUSG00000004665.10	Cnn2	290.686	1.06127	0.323014	9.32345e-05	0.00157488	2.08677	1
ENSMUSG00000112331.1	Gm33035	15.0177	3.11855	1.00183	9.35271e-05	0.00157827	8.68517	1
ENSMUSG00000031502.11	Col4a1	13223.4	0.982424	0.296135	9.4246e-05	0.00158884	1.97578	1
ENSMUSG00000020143.15	Dock2	47.1036	1.44129	0.453631	9.46874e-05	0.00159471	2.71564	1
ENSMUSG00000029036.18	Atad3a	539.43	0.840751	0.248438	9.55776e-05	0.00160655	1.79098	1
ENSMUSG00000029722.15	Agfg2	274.292	0.726323	0.209964	9.60236e-05	0.00161246	1.65442	1
ENSMUSG00000029322.12	Plac8	42.2462	1.39635	0.439391	9.68344e-05	0.00162449	2.63235	1
ENSMUSG00000030538.15	Cib1	673.821	0.845101	0.250798	0.000100061	0.00167534	1.79639	1
ENSMUSG00000036199.9	Ndufa13	1623.89	0.626637	0.178112	0.00010275	0.00171869	1.54396	1
ENSMUSG00000020650.15	Bcap29	592.281	0.839114	0.249212	0.000103189	0.00172435	1.78895	1
ENSMUSG00000056025.12	Clca3a1	22.447	2.00163	0.65166	0.000106447	0.00177533	4.00453	1
ENSMUSG00000029304.14	Spp1	900.314	0.641253	0.183629	0.000106682	0.00177751	1.55968	1
ENSMUSG00000107877.2	Gm43951	106.567	1.49641	0.481597	0.00010902	0.00181294	2.82139	1
ENSMUSG00000097310.2	A930038B10Rik	10.6912	3.35815	1.06339	0.000109544	0.0018199	10.2543	1
ENSMUSG00000032363.15	Adamts7	99.0037	1.14025	0.35673	0.000110494	0.00183036	2.20419	1
ENSMUSG00000024827.10	Gldc	125.712	1.09978	0.342289	0.000112535	0.00185783	2.14321	1
ENSMUSG00000029859.6	Epha1	86.7648	1.11739	0.348583	0.000112586	0.00185783	2.16954	1
ENSMUSG00000000531.5	Grasp	240.167	0.931677	0.283524	0.000113479	0.00187076	1.90749	1
ENSMUSG00000059049.14	Frem1	37.5792	1.58387	0.512427	0.000113625	0.00187137	2.99774	1
ENSMUSG00000040213.13	Kyat3	119.323	1.06609	0.330722	0.000114193	0.00187713	2.09375	1
ENSMUSG00000027714.11	Exosc9	764.352	0.624354	0.179224	0.000115328	0.00189215	1.54152	1
ENSMUSG00000028843.8	Sh3bgrl3	390.281	0.699077	0.203915	0.000115294	0.00189215	1.62347	1
ENSMUSG00000014313.15	Cox6c	2791.69	0.663371	0.19212	0.000115705	0.0018929	1.58378	1
ENSMUSG00000032766.9	Gng11	219.274	0.940064	0.286951	0.000115611	0.0018929	1.91861	1
ENSMUSG00000032834.11	Pwp2	389.844	0.689077	0.200769	0.000115701	0.0018929	1.61225	1
ENSMUSG00000017309.11	Cd300lg	1010.01	0.61716	0.176865	0.000116007	0.00189422	1.53385	1
ENSMUSG00000073599.10	Ecscr	136.73	0.869371	0.262483	0.000117591	0.00191644	1.82687	1
ENSMUSG00000090263.1	D730045A05Rik	13.6568	2.63056	0.863494	0.000120469	0.00196149	6.19265	1
ENSMUSG00000022971.18	Ifnar2	669.547	0.643603	0.186242	0.000121557	0.00197732	1.56223	1
ENSMUSG00000062380.4	Tubb3	1272.46	1.00049	0.309897	0.00012319	0.00200199	2.00068	1
ENSMUSG00000028849.17	Map7d1	1873.78	0.578337	0.164971	0.000125343	0.00202928	1.49313	1
ENSMUSG00000027322.11	Siglec1	22.0742	2.86342	0.972003	0.000130747	0.00210682	7.2774	1
ENSMUSG00000025538.15	Sumf2	216.502	0.963825	0.300242	0.000135666	0.00217383	1.95047	1
ENSMUSG00000025278.9	Flnb	10155.7	0.599574	0.173353	0.000136426	0.00218397	1.51527	1
ENSMUSG00000032299.10	Commd4	687.005	0.878509	0.269682	0.00013658	0.00218439	1.83847	1
ENSMUSG00000041577.5	Prelp	56.7924	1.61175	0.533886	0.00013904	0.00221135	3.05623	1
ENSMUSG00000057378.15	Ryr3	64.768	1.21608	0.392694	0.000143145	0.00227453	2.32315	1
ENSMUSG00000043671.14	Dpy19l3	241.727	0.934706	0.291592	0.000145161	0.00230017	1.9115	1
ENSMUSG00000002900.16	Lamb1	1621.4	0.885877	0.27364	0.000147014	0.00232524	1.84789	1
ENSMUSG00000027710.14	Acad9	696.384	0.641652	0.188929	0.0001492	0.00235547	1.56011	1
ENSMUSG00000064317.5	Gm10146	57.5676	1.1977	0.386995	0.000150373	0.00236744	2.29373	1
ENSMUSG00000039195.4	1110008P14Rik	636.315	0.944943	0.295871	0.000151302	0.00237989	1.92511	1
ENSMUSG00000024517.17	Grp	103.182	1.90831	0.650549	0.000151556	0.0023817	3.7537	1
ENSMUSG00000021613.9	Hapln1	1154.48	0.597758	0.174241	0.000152211	0.0023898	1.51336	1
ENSMUSG00000021010.8	Npas3	96.0032	1.88018	0.652535	0.000152827	0.00239289	3.68122	1
ENSMUSG00000022220.14	Adcy4	198.481	0.875343	0.271039	0.000152806	0.00239289	1.83444	1
ENSMUSG00000054690.17	Emcn	1728.73	0.531905	0.152681	0.000153451	0.00240048	1.44584	1
ENSMUSG00000024029.4	Tff3	13.5434	2.8956	0.985508	0.000155631	0.00242131	7.44154	1
ENSMUSG00000027533.10	Fabp5	202.475	0.970424	0.30643	0.000158639	0.00246142	1.95942	1
ENSMUSG00000041765.6	Ubac2	349.197	0.645531	0.191399	0.00016006	0.00248122	1.56432	1
ENSMUSG00000043943.14	Naalad2	121.994	0.996536	0.315766	0.000160786	0.00248798	1.9952	1
ENSMUSG00000002308.16	Cd320	279.078	0.891081	0.278563	0.000162915	0.00251638	1.85456	1
ENSMUSG00000028364.15	Tnc	62.9242	1.69544	0.575234	0.000163632	0.00252518	3.23876	1
ENSMUSG00000037916.14	Ndufv1	1908.95	0.604376	0.177795	0.000167233	0.00257379	1.52032	1
ENSMUSG00000001056.3	Nhp2	236.856	0.761014	0.232644	0.000171426	0.0026289	1.69468	1
ENSMUSG00000072437.4	Nanos1	183.241	0.837511	0.260061	0.000172476	0.00263557	1.78696	1
ENSMUSG00000059734.7	Ndufs8	1051.59	0.754062	0.231211	0.000178628	0.00272471	1.68653	1
ENSMUSG00000058145.16	Adamts17	246.181	1.27484	0.427307	0.000186366	0.00283266	2.41972	1
ENSMUSG00000029193.7	Cckar	65.5093	1.78662	0.621018	0.000189412	0.00286879	3.45005	1
ENSMUSG00000048376.6	F2r	479.721	0.998922	0.322564	0.000191592	0.00289925	1.99851	1
ENSMUSG00000020163.12	Uqcr11	1659.47	0.906621	0.288282	0.000192394	0.00290319	1.87465	1
ENSMUSG00000026260.12	Ndufa10	1157	0.577131	0.170658	0.00019253	0.00290319	1.49188	1
ENSMUSG00000040950.13	Mgl2	14.0872	2.81621	0.980226	0.000192155	0.00290319	7.04308	1
ENSMUSG00000037347.7	Chst7	45.4773	1.40298	0.47443	0.000193155	0.00291005	2.64447	1
ENSMUSG00000021136.13	Smoc1	194.2	1.10204	0.361386	0.000193447	0.00291189	2.14658	1
ENSMUSG00000048827.12	Pkd1l3	16.7915	2.69119	0.97816	0.000193936	0.0029167	6.45846	1
ENSMUSG00000021596.16	Mctp1	74.9846	1.24207	0.415552	0.00019478	0.00292682	2.36538	1
ENSMUSG00000029465.14	Arpc3	1912.88	0.626329	0.187713	0.00019531	0.00293222	1.54363	1
ENSMUSG00000018770.9	Atp5g3	3539.48	0.602422	0.179199	0.000198645	0.00297272	1.51826	1
ENSMUSG00000038188.17	Scarf1	138.483	0.818046	0.257463	0.00020622	0.00306382	1.76302	1
ENSMUSG00000029484.12	Anxa3	404.172	0.753824	0.234184	0.000207251	0.00307647	1.68626	1
ENSMUSG00000070953.13	Rabepk	231.308	0.979129	0.318962	0.00020981	0.00311176	1.97128	1
ENSMUSG00000019846.11	Lama4	1213.09	0.857128	0.272406	0.000210025	0.00311225	1.81143	1
ENSMUSG00000100303.3	2600014E21Rik	40.981	1.94209	0.72548	0.000215189	0.00318053	3.84262	1
ENSMUSG00000034729.16	Mrps10	466.713	0.763387	0.23893	0.000218472	0.00321519	1.69747	1
ENSMUSG00000085965.1	2310016D23Rik	11.4805	2.87292	1.00491	0.00021931	0.00321923	7.32547	1
ENSMUSG00000031740.8	Mmp2	116.867	1.25611	0.425571	0.000220071	0.00322764	2.38851	1
ENSMUSG00000057455.12	Rit2	174.623	1.06701	0.354491	0.000227627	0.00332425	2.09509	1
ENSMUSG00000014226.10	Cacybp	1824.49	0.622448	0.188971	0.000228147	0.00332544	1.53948	1
ENSMUSG00000058076.12	Sdhc	2472.29	0.731836	0.228774	0.000233822	0.00339448	1.66075	1
ENSMUSG00000046997.5	Spsb4	250.056	1.20439	0.409493	0.000234611	0.00340018	2.30439	1
ENSMUSG00000087242.2	C78197	39.2184	1.54133	0.539142	0.000236258	0.00342115	2.91063	1
ENSMUSG00000046768.13	Rhoj	195.857	0.908981	0.295628	0.00024117	0.0034776	1.87772	1
ENSMUSG00000031727.8	Pmfbp1	7.25415	4.419	1.59161	0.000247693	0.00355074	21.392	1
ENSMUSG00000054206.2	Gzmm	38.4093	1.4509	0.507497	0.000247541	0.00355074	2.73379	1
ENSMUSG00000053801.18	Grwd1	207.957	0.81337	0.260549	0.000248681	0.00356194	1.75731	1
ENSMUSG00000049115.15	Agtr1a	114.346	1.01135	0.337588	0.000259215	0.0036943	2.0158	1
ENSMUSG00000020169.4	Best3	426.209	0.788186	0.253033	0.000270227	0.00383529	1.7269	1
ENSMUSG00000004105.8	Angptl2	383.512	0.696073	0.21931	0.000281046	0.00396913	1.62009	1
ENSMUSG00000006445.3	Epha2	244.252	0.791699	0.255974	0.000285311	0.00401943	1.73111	1
ENSMUSG00000075224.10	Lrrc55	39.3606	1.68941	0.613003	0.000288521	0.00405799	3.22526	1
ENSMUSG00000085541.1	Gm16010	17.9215	2.32471	0.886339	0.00029073	0.00408558	5.00966	1
ENSMUSG00000116810.1	Gm32624	12.1906	2.23295	0.819784	0.000291606	0.00408797	4.70093	1
ENSMUSG00000057963.9	Itpk1	345.09	0.739067	0.23638	0.000293219	0.00410052	1.6691	1
ENSMUSG00000054435.16	Gimap4	414.69	0.694107	0.219481	0.000293515	0.00410131	1.61788	1
ENSMUSG00000085022.2	Gm5860	420.265	1.09647	0.37729	0.000299306	0.00416646	2.13831	1
ENSMUSG00000024451.9	Arap3	493.015	0.714066	0.227717	0.00030132	0.00418191	1.64042	1
ENSMUSG00000044894.14	Uqcrq	1828.15	0.858376	0.283078	0.000301485	0.00418191	1.813	1
ENSMUSG00000058715.11	Fcer1g	111.206	0.963858	0.324858	0.000301722	0.00418191	1.95052	1
ENSMUSG00000024664.5	Fads3	125.481	0.972404	0.32792	0.000303018	0.00419647	1.96211	1
ENSMUSG00000001435.15	Col18a1	420.41	1.07804	0.370382	0.00030501	0.00421385	2.11117	1
ENSMUSG00000047821.16	Trim16	91.7252	1.19218	0.41679	0.000304852	0.00421385	2.28498	1
ENSMUSG00000020155.2	Kcnmb1	82.3507	1.24988	0.442923	0.000321352	0.00440585	2.37821	1
ENSMUSG00000027474.13	Ccm2l	101.48	0.932333	0.315013	0.000324985	0.00444328	1.90836	1
ENSMUSG00000104022.1	Gm37214	46.9533	1.58068	0.579881	0.000327404	0.00447278	2.99111	1
ENSMUSG00000019997.11	Ccn2	519.679	0.965185	0.328258	0.000328566	0.00448152	1.95231	1
ENSMUSG00000037921.15	Ddx60	302.768	0.949907	0.323541	0.000336291	0.00457233	1.93175	1
ENSMUSG00000014361.5	Mertk	99.7548	0.9267	0.313715	0.000343565	0.00464899	1.90092	1
ENSMUSG00000033066.15	Gas7	150.442	0.950414	0.323571	0.000347173	0.00469053	1.93243	1
ENSMUSG00000031382.14	Asb11	128.326	1.51305	0.557678	0.000351392	0.00474379	2.85413	1
ENSMUSG00000067719.5	Gm10221	848.387	0.759221	0.248793	0.000353422	0.0047637	1.69258	1
ENSMUSG00000070530.5	Wfdc16	350.102	0.905392	0.306658	0.000354383	0.00476915	1.87305	1
ENSMUSG00000108930.1	Gm10648	7.11972	4.31382	1.6416	0.000363014	0.0048662	19.8879	1
ENSMUSG00000086390.7	1810019D21Rik	89.4689	1.03926	0.363914	0.000372621	0.00495624	2.05517	1
ENSMUSG00000034595.17	Ppp1r18	192.234	0.950705	0.326892	0.000373621	0.00496183	1.93282	1
ENSMUSG00000025129.2	Ppp1r27	7.08463	4.28911	1.6464	0.00038232	0.00506559	19.5502	1
ENSMUSG00000070436.12	Serpinh1	1694.6	0.781939	0.260336	0.000391879	0.00517226	1.71944	1
ENSMUSG00000069516.8	Lyz2	213.059	1.21646	0.4417	0.000400444	0.00525698	2.32376	1
ENSMUSG00000019831.14	Wasf1	139.982	0.951777	0.329754	0.000401358	0.00526093	1.93425	1
ENSMUSG00000027298.17	Tyro3	81.868	1.05054	0.370678	0.000401923	0.0052643	2.0713	1
ENSMUSG00000022018.7	Rgcc	735.281	0.855908	0.291609	0.00040917	0.00534696	1.8099	1
ENSMUSG00000050379.15	2021-09-06	134.852	0.988963	0.347248	0.00041806	0.00545483	1.98476	1
ENSMUSG00000054321.7	Taf4b	105.338	1.03114	0.366671	0.000439226	0.00567486	2.04363	1
ENSMUSG00000030782.16	Tgfb1i1	178.658	0.921694	0.32091	0.000441631	0.00569662	1.89434	1
ENSMUSG00000025780.7	Itih5	273.091	1.1004	0.396762	0.000442793	0.00570374	2.14414	1
ENSMUSG00000047497.10	Adamts12	184.509	1.29521	0.483267	0.000453571	0.00582944	2.45413	1
ENSMUSG00000005674.9	Tomm40l	752.567	0.839178	0.288374	0.000456381	0.00585678	1.78903	1
ENSMUSG00000029270.10	Dipk1a	113.528	1.01711	0.363452	0.000456229	0.00585678	2.02387	1
ENSMUSG00000005681.12	Apoa2	103.646	0.91148	0.319373	0.000466586	0.00596089	1.88097	1
ENSMUSG00000039450.11	Dcxr	124.638	0.9239	0.324941	0.000468685	0.00597887	1.89724	1
ENSMUSG00000037206.15	Islr	80.1975	1.21581	0.451305	0.000485829	0.00614726	2.32272	1
ENSMUSG00000107314.1	Gm20488	10.7348	2.68467	1.05575	0.00049443	0.00624686	6.42935	1
ENSMUSG00000030159.15	Clec1b	9.34181	3.34441	1.26671	0.000501865	0.00632218	10.1571	1
ENSMUSG00000040797.16	Iqsec3	70.3033	1.14614	0.425636	0.000526175	0.00657048	2.21321	1
ENSMUSG00000039438.7	Ttc36	22.6572	1.77436	0.712055	0.000540934	0.00674006	3.42087	1
ENSMUSG00000002274.13	Metrn	72.2596	1.18411	0.444882	0.000541814	0.00674612	2.27224	1
ENSMUSG00000060568.14	Fam78b	77.2986	1.01327	0.368376	0.000545275	0.00676955	2.01848	1
ENSMUSG00000054134.14	Umodl1	45.6227	4.11134	1.88104	0.000556607	0.00688079	17.2836	1
ENSMUSG00000030208.15	Emp1	1134.71	1.18172	0.445465	0.000557187	0.00688254	2.26847	1
ENSMUSG00000021852.14	Slc35f4	18.2264	1.89443	0.746517	0.000558166	0.00688968	3.71775	1
ENSMUSG00000021730.8	Hcn1	31.6505	1.40395	0.544833	0.00056158	0.00691687	2.64626	1
ENSMUSG00000017204.4	Gsdma	69.1157	1.11429	0.416877	0.000569945	0.00698978	2.16489	1
ENSMUSG00000090084.7	Srpx	45.6599	1.34578	0.518947	0.000574286	0.00703295	2.54168	1
ENSMUSG00000079017.3	Ifi27l2a	47.5536	1.13718	0.428994	0.000592264	0.00722731	2.1995	1
ENSMUSG00000031304.18	Il2rg	78.666	0.938529	0.340211	0.000595824	0.00726137	1.91657	1
ENSMUSG00000029570.5	Lfng	90.3282	1.25524	0.485501	0.000604752	0.00732754	2.38708	1
ENSMUSG00000086706.7	Gm15848	12.3047	2.0883	0.843503	0.000611513	0.00738857	4.25246	1
ENSMUSG00000113650.1	Gm47826	34.0765	1.30022	0.504493	0.00061121	0.00738857	2.46266	1
ENSMUSG00000030017.2	Reg3g	48.1016	2.09935	0.888043	0.000633989	0.00764398	4.28517	1
ENSMUSG00000032011.5	Thy1	361.877	1.16805	0.450955	0.000649053	0.00777479	2.24708	1
ENSMUSG00000032085.5	Tagln	285.185	0.991624	0.368851	0.000649373	0.00777479	1.98842	1
ENSMUSG00000039109.16	F13a1	121.013	0.986388	0.365934	0.000653808	0.00781153	1.98122	1
ENSMUSG00000053965.10	Pde5a	5210.01	1.07151	0.406271	0.000675944	0.00803123	2.10163	1
ENSMUSG00000092071.1	A230065N10Rik	45.9109	1.438	0.579691	0.000678946	0.00805573	2.70944	1
ENSMUSG00000032625.14	Thsd7a	133.918	1.01861	0.385999	0.000703368	0.00829955	2.02597	1
ENSMUSG00000026162.7	Nhej1	74.3722	1.5436	0.650505	0.000725453	0.00850745	2.91522	1
ENSMUSG00000104610.1	Gm567	7.88843	3.14934	1.25684	0.000750226	0.008762	8.87248	1
ENSMUSG00000087574.1	C030037D09Rik	50.7713	1.0233	0.389527	0.000752864	0.00878683	2.03257	1
ENSMUSG00000094445.7	1700015G11Rik	9.52289	2.91557	1.22684	0.000766512	0.00890369	7.54528	1
ENSMUSG00000019772.5	Vip	2784.97	1.75517	0.757076	0.000814173	0.00937285	3.37566	1
ENSMUSG00000102549.1	Gm38137	10.9679	2.30104	0.984847	0.000831026	0.00951131	4.92813	1
ENSMUSG00000069707.1	Taar4	10.5569	2.59881	1.13174	0.000880649	0.00993991	6.05786	1
ENSMUSG00000032243.8	Itga11	15.0546	1.7969	0.771826	0.000882305	0.00994628	3.47473	1
ENSMUSG00000021594.11	Srd5a1	54.2834	1.04352	0.4092	0.000887545	0.00997834	2.06125	1
ENSMUSG00000019762.4	Iyd	23.8926	1.69876	0.747065	0.000900359	0.0100882	3.24622	1
ENSMUSG00000022103.10	Gfra2	134.441	1.21698	0.504932	0.00101592	0.011125	2.3246	1
ENSMUSG00000030137.8	Tuba8	32.8798	1.29907	0.549737	0.00104718	0.0113848	2.46071	1
ENSMUSG00000100182.6	1810006J02Rik	30.5729	1.46339	0.635224	0.0010631	0.0115433	2.75756	1
ENSMUSG00000070942.8	Il1rl2	36.2314	1.36036	0.588081	0.00109919	0.0118451	2.5675	1
ENSMUSG00000085810.7	Gm16325	9.51712	3.14061	1.50388	0.00112096	0.0120494	8.81896	1
ENSMUSG00000044734.16	Serpinb1a	66.4398	1.1159	0.46352	0.0011307	0.0121372	2.16729	1
ENSMUSG00000090996.1	Gm20458	14.0296	3.09152	1.50145	0.00117931	0.0125567	8.52393	1
ENSMUSG00000090002.1	Gm16006	34.0038	1.26301	0.542798	0.00119208	0.0126396	2.39996	1
ENSMUSG00000030562.17	Nox4	39.1964	1.13592	0.480522	0.00126487	0.01328	2.19759	1
ENSMUSG00000071202.5	Ccdc78	15.8164	1.74269	0.797113	0.00126891	0.0133142	3.34659	1
ENSMUSG00000051159.16	Cited1	34.0878	1.19726	0.517244	0.00133118	0.0138742	2.29304	1
ENSMUSG00000031997.9	Trpc6	33.0453	1.15889	0.500939	0.00140498	0.0144675	2.23285	1
ENSMUSG00000021301.9	Hecw1	19.3116	2.07453	1.04169	0.00145055	0.0147946	4.21207	1
ENSMUSG00000115811.1	Gm41293	24.5614	1.50992	0.707747	0.00146689	0.0149257	2.84794	1
ENSMUSG00000051506.17	Wdfy4	35.8472	1.54941	0.748749	0.00147239	0.0149559	2.92697	1
ENSMUSG00000067872.2	Ccdc87	15.9724	1.60505	0.759239	0.00154172	0.0155487	3.04205	1
ENSMUSG00000086741.1	Gm15816	16.7776	1.57862	0.75561	0.00159635	0.0160243	2.98684	1
ENSMUSG00000054966.13	Lmntd1	9.05543	2.80009	1.39124	0.00160973	0.0161053	6.96484	1
ENSMUSG00000032503.18	Arpp21	19.7629	1.69952	0.840223	0.00170203	0.0168581	3.24793	1
ENSMUSG00000037942.5	Crp	14.8825	1.77898	0.888891	0.00172323	0.0170385	3.43183	1
ENSMUSG00000096525.2	Gm2663	15.7024	1.77704	0.888949	0.00175249	0.0172483	3.42723	1
ENSMUSG00000036938.17	Try5	5342.22	1.66872	0.845803	0.00176964	0.0173513	3.17933	1
ENSMUSG00000099988.7	1700054A03Rik	20.086	1.41364	0.675634	0.00179166	0.0174732	2.66408	1
ENSMUSG00000016024.9	Lbp	41.4897	1.17789	0.544226	0.00179906	0.0175155	2.26246	1
ENSMUSG00000050830.17	Vwc2	10.2421	2.10111	1.12136	0.00184957	0.0179056	4.29039	1
ENSMUSG00000055235.11	Wdr86	18.5971	1.79156	0.915911	0.00186484	0.0180229	3.46188	1
ENSMUSG00000013083.8	2200002J24Rik	46.0241	1.39971	0.689173	0.00187106	0.0180597	2.63849	1
ENSMUSG00000041670.17	Rims1	32.3918	1.23235	0.58384	0.0018838	0.0181652	2.3495	1
ENSMUSG00000078252.1	Krtap17-1	111.884	1.37356	0.678124	0.00194136	0.0186051	2.59109	1
ENSMUSG00000022221.14	Ripk3	25.5928	1.25537	0.597908	0.0019574	0.0187171	2.38729	1
ENSMUSG00000064945.1	Rny3	18.9222	2.94847	1.83679	0.00202556	0.0191975	7.71928	1
ENSMUSG00000030219.13	Erp27	70.4152	1.37439	0.687249	0.00207186	0.019539	2.59257	1
ENSMUSG00000114452.1	A530001N23Rik	24.0283	1.34902	0.672699	0.00211595	0.0198674	2.54739	1
ENSMUSG00000068341.8	Reg3d	119.127	1.29044	0.637838	0.00213819	0.0200105	2.44603	1
ENSMUSG00000000889.8	Dbh	18.8197	2.35204	1.40055	0.00222574	0.0206719	5.10546	1
ENSMUSG00000030344.11	Akap3	10.3738	2.00304	1.0756	0.00225702	0.0209126	4.00844	1
ENSMUSG00000043557.16	Mdga1	18.4156	1.45966	0.810686	0.00263611	0.0236628	2.75043	1
ENSMUSG00000031380.10	Vegfd	17.2024	1.49719	0.81452	0.0027005	0.0239772	2.82291	1
ENSMUSG00000099519.1	Gm29253	7.92705	2.79644	1.60973	0.002735	0.0241959	6.94724	1
ENSMUSG00000100965.1	Gm28449	7.77843	2.39531	1.45601	0.0031145	0.0268332	5.26091	1
ENSMUSG00000053199.13	Arhgap20	11.6692	1.56529	0.912662	0.00333417	0.0283278	2.95937	1
ENSMUSG00000036144.6	Meox2	25.7622	1.31004	0.734304	0.00336999	0.0285955	2.47948	1
ENSMUSG00000056632.8	Dsg3	7.55579	2.69133	1.6836	0.00342206	0.028902	6.45908	1
ENSMUSG00000053093.16	Myh7	13.0002	1.84425	1.36195	0.00366411	0.0305699	3.59067	1
ENSMUSG00000024598.9	Fbn2	73.344	1.35392	0.841048	0.00385052	0.0318155	2.55607	1
ENSMUSG00000035385.5	Ccl2	22.9101	1.72939	1.29037	0.00417837	0.0336879	3.31587	1
ENSMUSG00000024575.16	Pde6a	20.4843	1.46984	1.00188	0.00423869	0.0340226	2.76991	1
ENSMUSG00000031270.1	4930513O06Rik	7.24779	1.99741	1.34441	0.00424323	0.0340431	3.99283	1
ENSMUSG00000055865.8	Tafa3	12.4286	1.62655	1.19135	0.00432862	0.0345323	3.08773	1
ENSMUSG00000042828.12	Trim72	9.11214	2.01126	1.48781	0.00436347	0.0346832	4.03133	1
ENSMUSG00000074284.6	Gm10658	11.9174	1.39475	0.931048	0.00493881	0.037567	2.62943	1
ENSMUSG00000001864.13	Aif1l	14.0229	1.66215	1.6024	0.00509762	0.0384001	3.16489	1
ENSMUSG00000022824.12	Muc13	8.07023	1.65867	1.29657	0.00568774	0.041745	3.15725	1
ENSMUSG00000004892.13	Bcan	13.254	1.42224	1.27809	0.00648786	0.0460789	2.68001	1

## Sheet: Stable Genes
geneID	geneSymbol	baseMean	log2FoldChange	lfcSE	pvalue	padj	FC	flag
ENSMUSG00000023977.15	Ubr2	2387.4	-0.525179	0.15338	0.000192265	0.00290319	-1.43911	0
ENSMUSG00000028572.13	Hook1	3291.25	-0.524398	0.153644	0.000201245	0.00300552	-1.43833	0
ENSMUSG00000001946.14	Esam	871.523	0.554685	0.16404	0.000206145	0.00306382	1.46885	0
ENSMUSG00000015027.11	Galns	1357.83	0.539135	0.159505	0.000218955	0.00321768	1.4531	0
ENSMUSG00000031392.18	Irak1	3188.79	-0.578163	0.173634	0.000226523	0.00331094	-1.49295	0
ENSMUSG00000024346.6	Pfdn1	801.164	0.533855	0.159007	0.000240157	0.0034659	1.44779	0
ENSMUSG00000038845.11	Phb	1099.59	0.610675	0.186088	0.000245631	0.00353005	1.52697	0
ENSMUSG00000026991.20	Pkp4	2885.26	-0.498991	0.147827	0.000249925	0.00357676	-1.41322	0
ENSMUSG00000000278.10	Scpep1	1816.6	-0.502556	0.14954	0.000260283	0.00370644	-1.41672	0
ENSMUSG00000037499.9	Nenf	1166.17	0.649745	0.201258	0.00026506	0.00377133	1.56889	0
ENSMUSG00000052298.12	Cdc42se2	2477.9	0.506695	0.151158	0.000266707	0.00379161	1.42079	0
ENSMUSG00000017778.14	Cox7c	2252.73	0.621006	0.191762	0.000277975	0.0039355	1.53795	0
ENSMUSG00000040537.17	Adam22	1713.49	-0.558452	0.169929	0.000279936	0.00395998	-1.47269	0
ENSMUSG00000045790.10	Ccdc149	567.663	-0.616832	0.190589	0.000280585	0.00396589	-1.5335	0
ENSMUSG00000023805.17	Synj2	495.461	-0.644824	0.200993	0.000282131	0.00397791	-1.56355	0
ENSMUSG00000066877.11	Nck2	520.94	-0.686572	0.216811	0.000291146	0.00408558	-1.60946	0
ENSMUSG00000096210.2	H1f0	4792.36	-0.483134	0.144354	0.000291198	0.00408558	-1.39778	0
ENSMUSG00000052566.8	Hook2	887.169	-0.625135	0.194709	0.000295763	0.004126	-1.54236	0
ENSMUSG00000004788.11	Eif2b2	1233.02	0.599759	0.185239	0.000296806	0.00413719	1.51546	0
ENSMUSG00000046671.18	Mtfr1l	1403.71	0.529882	0.160598	0.000299392	0.00416646	1.44381	0
ENSMUSG00000030718.9	Ppme1	2368.09	0.554488	0.169355	0.000301364	0.00418191	1.46865	0
ENSMUSG00000038648.5	Creb3l2	4042.31	-0.623556	0.194508	0.00030171	0.00418191	-1.54067	0
ENSMUSG00000022681.15	Ntan1	624.506	0.578324	0.178186	0.000305862	0.0042165	1.49311	0
ENSMUSG00000090841.2	Myl6	7194.23	0.623707	0.19413	0.000305939	0.0042165	1.54083	0
ENSMUSG00000026463.17	Atp2b4	2950.54	0.643826	0.202003	0.00030955	0.00426284	1.56247	0
ENSMUSG00000020176.17	Grb10	1321.92	-0.684886	0.217632	0.000310987	0.00427919	-1.60758	0
ENSMUSG00000032590.14	Apeh	859.981	-0.677992	0.215731	0.000316507	0.00434816	-1.59991	0
ENSMUSG00000021185.16	Dglucy	280.563	0.723399	0.233456	0.000329302	0.00448798	1.65107	0
ENSMUSG00000028960.20	Ube4b	2292.69	-0.544283	0.16703	0.000330142	0.00449586	-1.4583	0
ENSMUSG00000004846.10	Plod3	1375.07	0.657075	0.208401	0.000332475	0.00452403	1.57688	0
ENSMUSG00000022265.7	Ank	5852.35	-0.463018	0.13926	0.000337547	0.00458577	-1.37842	0
ENSMUSG00000030872.14	Gga2	2475.35	-0.499512	0.151592	0.000337901	0.00458694	-1.41374	0
ENSMUSG00000021510.11	Zfp729a	740.81	0.635799	0.20086	0.000339286	0.0046021	1.5538	0
ENSMUSG00000016128.14	Stard13	1041.09	-0.564495	0.17502	0.000339723	0.00460439	-1.47887	0
ENSMUSG00000038074.16	Fkbp14	362.75	0.609633	0.19131	0.000342016	0.00463181	1.52587	0
ENSMUSG00000037824.6	Tspan14	436.141	0.589977	0.184723	0.000354166	0.00476915	1.50522	0
ENSMUSG00000021996.16	Esd	2396.51	0.510684	0.156129	0.000356004	0.00478346	1.42473	0
ENSMUSG00000040136.10	Abcc8	20730.6	-0.735168	0.238227	0.000358429	0.00481226	-1.66459	0
ENSMUSG00000042626.13	Shc1	2536.44	-0.473248	0.143719	0.000367741	0.00492187	-1.38823	0
ENSMUSG00000061911.15	Myt1l	1061.66	-0.584623	0.183421	0.000369921	0.00494334	-1.49965	0
ENSMUSG00000029247.17	Paics	2472.9	0.526243	0.162356	0.000370686	0.00494585	1.44017	0
ENSMUSG00000019087.13	Atp6ap1	6537.64	0.566905	0.177071	0.000371942	0.0049543	1.48134	0
ENSMUSG00000025917.9	Cops5	1706.86	0.569659	0.177911	0.000372186	0.0049543	1.48417	0
ENSMUSG00000041120.6	Nbl1	267.039	-0.67016	0.215839	0.000372058	0.0049543	-1.59125	0
ENSMUSG00000054733.9	Msra	243.03	0.717207	0.233845	0.000373502	0.00496183	1.644	0
ENSMUSG00000020312.12	Shc2	782.408	-0.519039	0.1605	0.00037729	0.00500668	-1.433	0
ENSMUSG00000009863.14	Sdhb	1624.89	0.647097	0.207621	0.000385193	0.00509578	1.56601	0
ENSMUSG00000063704.13	Mapk15	545.586	-0.746944	0.247067	0.000385558	0.00509668	-1.67823	0
ENSMUSG00000027999.15	Pla2g12a	915.761	0.668693	0.216219	0.000392897	0.00518155	1.58963	0
ENSMUSG00000033487.14	Fndc3a	7341.09	-0.602076	0.191325	0.000396787	0.00522096	-1.5179	0
ENSMUSG00000023017.10	Asic1	924.512	-0.602282	0.191598	0.000398514	0.00523963	-1.51812	0
ENSMUSG00000036850.4	Mrpl41	556.029	0.759923	0.252243	0.000398817	0.00523963	1.6934	0
ENSMUSG00000087651.3	1500009L16Rik	347.558	-0.610269	0.195102	0.000408282	0.00533943	-1.52654	0
ENSMUSG00000023367.14	Tmem176a	2449.01	0.538266	0.168287	0.00041263	0.00538808	1.45223	0
ENSMUSG00000050556.9	Kcnb1	1932.63	-0.581322	0.184684	0.000421866	0.0055003	-1.49622	0
ENSMUSG00000072694.8	1500011B03Rik	1133.73	-0.546969	0.171878	0.000425411	0.0055339	-1.46101	0
ENSMUSG00000003378.9	Grik5	958.633	-0.530214	0.166376	0.000433535	0.00561402	-1.44414	0
ENSMUSG00000004562.16	Arhgef40	318.043	0.640786	0.20759	0.00043322	0.00561402	1.55918	0
ENSMUSG00000021748.9	Pdhb	2764.61	0.546165	0.171936	0.000432984	0.00561402	1.4602	0
ENSMUSG00000028339.17	Col15a1	2417.42	0.790066	0.266748	0.000437715	0.00566387	1.72915	0
ENSMUSG00000031683.16	Lsm6	1182.14	-0.561296	0.178066	0.000438632	0.00567145	-1.47559	0
ENSMUSG00000049191.12	Rtl5	1617.64	-0.690072	0.227545	0.000441908	0.00569662	-1.61336	0
ENSMUSG00000000440.12	Pparg	174.987	0.797058	0.270416	0.000445012	0.00572802	1.73755	0
ENSMUSG00000075254.12	Heg1	1704.13	-0.529194	0.166943	0.000462171	0.00592222	-1.44312	0
ENSMUSG00000021290.6	Atp5mpl	1047.02	0.709377	0.235817	0.000462611	0.00592342	1.6351	0
ENSMUSG00000032202.11	Rab27a	4387.69	-0.70424	0.234457	0.000463218	0.00592532	-1.62929	0
ENSMUSG00000026664.7	Phyh	1916.39	-0.598398	0.193091	0.000466928	0.00596089	-1.51403	0
ENSMUSG00000029186.12	Pi4k2b	694.214	-0.617583	0.200524	0.00046993	0.00598584	-1.5343	0
ENSMUSG00000060803.6	Gstp1	987.511	-0.712068	0.23794	0.000471682	0.0060037	-1.63815	0
ENSMUSG00000024168.8	Tmem204	441.279	0.548709	0.174587	0.000480546	0.00609842	1.46278	0
ENSMUSG00000030431.8	Tmem238	184.207	0.796081	0.272413	0.000481233	0.00610262	1.73638	0
ENSMUSG00000022136.8	Dnajc3	6606.4	-0.679612	0.226211	0.000483592	0.00612799	-1.60171	0
ENSMUSG00000001123.15	Lgals9	253.775	0.750519	0.253583	0.000485394	0.00614629	1.6824	0
ENSMUSG00000047721.8	Bola2	350.916	0.749809	0.254148	0.000495019	0.00624971	1.68157	0
ENSMUSG00000028656.14	Cap1	4089.39	0.515338	0.162322	0.000497492	0.0062763	1.42933	0
ENSMUSG00000027447.6	Cst3	15607.1	0.681867	0.228822	0.000498236	0.00628108	1.60421	0
ENSMUSG00000020111.15	Micu1	1336.35	0.53873	0.171998	0.000512995	0.00642931	1.45269	0
ENSMUSG00000032479.15	Map4	1884.32	0.594754	0.193197	0.000512661	0.00642931	1.51022	0
ENSMUSG00000042312.9	S100a13	240.951	0.820461	0.284768	0.000515546	0.00645656	1.76597	0
ENSMUSG00000037470.14	Uggt1	7219.3	-0.570586	0.184585	0.000520636	0.00651555	-1.48513	0
ENSMUSG00000039183.6	Nubp2	412.646	0.712715	0.240484	0.000522584	0.00653039	1.63889	0
ENSMUSG00000108929.2	Cc2d2b	264.009	-0.717838	0.243994	0.000537858	0.00670734	-1.64472	0
ENSMUSG00000030956.15	Fam53b	341.917	0.755349	0.259119	0.000543569	0.00675815	1.68804	0
ENSMUSG00000050751.14	Pgbd5	475.181	-0.657528	0.219557	0.000543187	0.00675815	-1.57738	0
ENSMUSG00000027293.13	Ehd4	1574.43	0.559684	0.18107	0.000550856	0.00683388	1.47395	0
ENSMUSG00000033943.15	Mga	2241.25	-0.621306	0.205302	0.000551869	0.0068415	-1.53827	0
ENSMUSG00000037152.11	Ndufc1	720.017	0.629825	0.20851	0.000552528	0.00684472	1.54738	0
ENSMUSG00000042734.6	Ttc9	926.567	0.838457	0.294015	0.000555062	0.00687114	1.78814	0
ENSMUSG00000035443.10	Thyn1	397.433	0.638356	0.212018	0.000556644	0.00688079	1.55655	0
ENSMUSG00000034677.9	Gpr142	412.076	-0.688774	0.233012	0.000560251	0.00690547	-1.61191	0
ENSMUSG00000050538.8	B230217C12Rik	296.823	-0.621014	0.205683	0.000562562	0.006924	-1.53796	0
ENSMUSG00000017943.15	Gdap1l1	1658.12	0.514088	0.163976	0.00056565	0.00695701	1.42809	0
ENSMUSG00000021256.5	Vash1	298.728	0.647619	0.216099	0.000567952	0.00698032	1.56658	0
ENSMUSG00000024064.14	Galnt14	870.682	-0.579381	0.189589	0.000568692	0.0069844	-1.49421	0
ENSMUSG00000057604.9	Lmcd1	173.882	0.867389	0.30759	0.000569631	0.00698978	1.82436	0
ENSMUSG00000022661.14	Cd200	2763.86	0.556521	0.180542	0.000570511	0.00699172	1.47072	0
ENSMUSG00000001768.16	Rin2	264.905	-0.690349	0.234004	0.000578071	0.00707425	-1.61367	0
ENSMUSG00000020464.15	Pnpt1	588.265	0.601053	0.19842	0.000587482	0.00717406	1.51682	0
ENSMUSG00000038456.9	Dennd2a	360.583	0.758236	0.262789	0.000595903	0.00726137	1.69142	0
ENSMUSG00000022208.12	Jph4	207.113	-0.824546	0.291441	0.000596754	0.00726592	-1.77098	0
ENSMUSG00000034656.18	Cacna1a	1435.16	-0.648683	0.21812	0.000597624	0.00726685	-1.56774	0
ENSMUSG00000024560.7	Cxxc1	1468.34	0.571814	0.18747	0.000600787	0.00729497	1.48639	0
ENSMUSG00000032431.6	Crtap	536.838	0.781068	0.272898	0.000603163	0.00731346	1.7184	0
ENSMUSG00000036968.15	Cnpy4	323.042	0.623741	0.207813	0.000603043	0.00731346	1.54087	0
ENSMUSG00000090272.9	Mndal	191.693	0.763434	0.265941	0.0006068	0.00734717	1.69753	0
ENSMUSG00000094050.1	Gm23472	86.8735	0.0958836	0.381396	0.000619355	0.00747806	1.06872	0
ENSMUSG00000078161.8	Erich3	1183.45	-0.681375	0.232256	0.000621038	0.0074931	-1.60367	0
ENSMUSG00000031375.17	Bgn	1171.75	0.88868	0.321287	0.000635121	0.00764687	1.85148	0
ENSMUSG00000040158.12	Tax1bp3	379.462	0.622855	0.208786	0.000635005	0.00764687	1.53992	0
ENSMUSG00000040479.12	Dgkz	2067.32	0.578995	0.191055	0.00063617	0.00765413	1.49381	0
ENSMUSG00000020811.16	Wscd1	232.954	-0.688205	0.236089	0.000644894	0.00774822	-1.61128	0
ENSMUSG00000031819.13	Emc8	809.494	0.81665	0.290769	0.000644707	0.00774822	1.76131	0
ENSMUSG00000026113.17	Inpp4a	3013.92	-0.512905	0.166329	0.000648529	0.00777479	-1.42692	0
ENSMUSG00000062519.13	Zfp398	965.728	-0.615026	0.206371	0.00065033	0.00778081	-1.53159	0
ENSMUSG00000074466.12	Gm15417	95.125	-0.898177	0.328349	0.000653183	0.00780949	-1.86371	0
ENSMUSG00000035992.15	Fnip1	1952.3	-0.755174	0.265368	0.000658266	0.00785932	-1.68784	0
ENSMUSG00000073433.11	Arhgdig	277.396	0.704001	0.243441	0.000667675	0.00796056	1.62902	0
ENSMUSG00000023262.13	Acy1	193.032	0.724058	0.252063	0.000669879	0.00798128	1.65182	0
ENSMUSG00000038578.15	Susd1	343.726	-0.869826	0.316626	0.000671774	0.00799831	-1.82744	0
ENSMUSG00000028318.14	Polr1e	134.214	0.903044	0.330509	0.00067325	0.00801031	1.87001	0
ENSMUSG00000034845.6	Plvap	4176.76	0.57355	0.190269	0.000674677	0.00802173	1.48818	0
ENSMUSG00000025144.17	Cenpx	400.425	0.712794	0.247551	0.000676561	0.00803299	1.63898	0
ENSMUSG00000022951.16	Rcan1	527.089	0.686457	0.236476	0.000681182	0.00807667	1.60933	0
ENSMUSG00000013787.15	Ehmt2	3453.07	-0.428284	0.135881	0.000685922	0.00812725	-1.34563	0
ENSMUSG00000001504.10	Irx2	751.196	-0.591814	0.19829	0.000687802	0.0081439	-1.50714	0
ENSMUSG00000034269.12	Setd5	3079.01	-0.42913	0.136346	0.000690654	0.00817202	-1.34642	0
ENSMUSG00000038375.15	Trp53inp2	6714.98	-0.741132	0.261725	0.000691905	0.00818118	-1.67149	0
ENSMUSG00000003352.14	Cacnb3	1372.55	-0.580232	0.194014	0.000702757	0.00829805	-1.49509	0
ENSMUSG00000060098.11	Prmt7	457.706	0.658779	0.225904	0.000704063	0.00830204	1.57875	0
ENSMUSG00000032112.10	Trappc4	871.653	0.67395	0.232312	0.0007068	0.00832858	1.59544	0
ENSMUSG00000032289.15	Thsd4	464.189	-0.765262	0.271669	0.000707622	0.00833254	-1.69968	0
ENSMUSG00000021287.12	Xrcc3	195.308	-0.639528	0.218551	0.000718344	0.00844719	-1.55782	0
ENSMUSG00000007655.16	Cav1	791.952	0.757653	0.268413	0.000719101	0.00845029	1.69074	0
ENSMUSG00000056737.14	Capg	90.4202	0.908557	0.335544	0.00072273	0.00848713	1.87717	0
ENSMUSG00000046079.16	Lrrc8d	1393.72	-0.600339	0.202954	0.000725334	0.00850745	-1.51607	0
ENSMUSG00000060862.10	Zbtb40	887.441	-0.784708	0.281855	0.000736131	0.00862677	-1.72274	0
ENSMUSG00000036046.14	5031439G07Rik	1281.18	-0.613216	0.208404	0.000737627	0.00863839	-1.52967	0
ENSMUSG00000061601.15	Pclo	5230.84	-0.562441	0.188102	0.000741108	0.00867324	-1.47677	0
ENSMUSG00000074738.2	Fndc10	319.177	-0.651279	0.224536	0.000749041	0.00875413	-1.57056	0
ENSMUSG00000029003.11	Mad2l2	307.431	0.748414	0.266296	0.000753963	0.00879367	1.67995	0
ENSMUSG00000002768.8	Mea1	831.874	0.637683	0.218974	0.000757228	0.00882575	1.55583	0
ENSMUSG00000034382.14	AI661453	390.815	-0.684407	0.238939	0.000760999	0.00886367	-1.60704	0
ENSMUSG00000027618.17	Nfs1	876.343	0.590275	0.199685	0.000764954	0.0089016	1.50553	0
ENSMUSG00000038462.3	Uqcrfs1	1890.54	0.463655	0.150123	0.000765813	0.0089016	1.37903	0
ENSMUSG00000034911.8	Ushbp1	306.746	0.713683	0.251644	0.000768755	0.0089237	1.63999	0
ENSMUSG00000023963.10	Cyp39a1	212.114	-0.862614	0.317592	0.000773873	0.00897096	-1.81833	0
ENSMUSG00000017344.4	Vtn	199.489	-0.934688	0.352145	0.000778124	0.00900969	-1.91148	0
ENSMUSG00000041891.16	Lman1	7991.94	-0.656422	0.227872	0.000778265	0.00900969	-1.57617	0
ENSMUSG00000032724.5	Abtb2	73.9487	0.909281	0.339444	0.000783141	0.00905536	1.87811	0
ENSMUSG00000021606.8	Ndufs6	1006.06	0.515526	0.170469	0.000789359	0.00911965	1.42951	0
ENSMUSG00000020661.15	Dnmt3a	3779.3	-0.544746	0.182293	0.0007901	0.00912207	-1.45876	0
ENSMUSG00000026473.16	Glul	11435.8	-0.68349	0.238071	0.00079473	0.00916935	-1.60602	0
ENSMUSG00000022180.7	Slc7a8	2943.48	-0.685566	0.241452	0.000807818	0.00931408	-1.60833	0
ENSMUSG00000020538.15	Srebf1	1913.06	-0.69837	0.247118	0.000810531	0.00933908	-1.62267	0
ENSMUSG00000000794.9	Kcnn3	2288.58	0.71844	0.255203	0.000815646	0.00937285	1.6454	0
ENSMUSG00000036568.7	Bicral	857.434	-0.507524	0.16812	0.000814801	0.00937285	-1.42161	0
ENSMUSG00000051136.1	Ghsr	118.309	-0.894111	0.334337	0.000815649	0.00937285	-1.85846	0
ENSMUSG00000053334.6	Ficd	997.203	-0.622229	0.214668	0.000816417	0.0093754	-1.53925	0
ENSMUSG00000042590.17	Ipo11	436.261	0.678977	0.238135	0.000817034	0.00937621	1.601	0
ENSMUSG00000026740.12	Dnajc1	1318.35	-0.563568	0.190533	0.000819215	0.00939494	-1.47792	0
ENSMUSG00000034566.10	Atp5h	2753.29	0.548272	0.184191	0.000824552	0.00944352	1.46233	0
ENSMUSG00000030494.13	Rhpn2	1619.69	-0.632803	0.219674	0.000834698	0.00953755	-1.55058	0
ENSMUSG00000041632.7	Mrps27	311.286	0.656463	0.229381	0.000834216	0.00953755	1.57621	0
ENSMUSG00000087620.7	5330434G04Rik	138.619	-0.763861	0.277779	0.000834988	0.00953755	-1.69803	0
ENSMUSG00000029993.16	Nfu1	615.015	0.566433	0.191903	0.000836209	0.00954514	1.48086	0
ENSMUSG00000026921.19	Egfl7	941.232	0.819035	0.30122	0.0008368	0.00954553	1.76423	0
ENSMUSG00000028631.7	Kcnq4	148.033	-0.809251	0.297957	0.000838638	0.00954744	-1.7523	0
ENSMUSG00000029621.14	Arpc1a	2983.23	-0.515711	0.171829	0.000837612	0.00954744	-1.4297	0
ENSMUSG00000117098.1	Gm49909	1206.12	0.474741	0.155852	0.000838316	0.00954744	1.38967	0
ENSMUSG00000039131.15	Gipc2	56.995	-0.978229	0.374972	0.000843198	0.00959299	-1.97004	0
ENSMUSG00000028964.14	Park7	2841.32	0.509669	0.168838	0.000847533	0.00963362	1.42372	0
ENSMUSG00000089678.8	Agxt2	94.2558	0.95376	0.365154	0.000847893	0.00963362	1.93691	0
ENSMUSG00000039852.17	Rere	3679.71	-0.52467	0.175541	0.000853596	0.00969198	-1.4386	0
ENSMUSG00000032042.11	Srpr	9269.17	-0.545925	0.18489	0.000854615	0.00969714	-1.45996	0
ENSMUSG00000082585.3	Gm15387	473.657	-0.735342	0.264839	0.000859571	0.00974692	-1.66479	0
ENSMUSG00000053916.4	Nanp	159.624	-0.84151	0.313998	0.000867736	0.00983301	-1.79192	0
ENSMUSG00000035637.14	Grhpr	268.15	-0.583584	0.200028	0.000868712	0.00983757	-1.49857	0
ENSMUSG00000025732.6	Mcrip2	96.7539	0.841122	0.313134	0.000870512	0.00985144	1.79144	0
ENSMUSG00000053825.15	Ppfia2	167.505	0.784447	0.286978	0.000873622	0.00988011	1.72243	0
ENSMUSG00000025932.14	Eya1	255.234	-0.730856	0.264334	0.000876872	0.00991033	-1.65962	0
ENSMUSG00000025511.15	Tspan4	236.855	0.825013	0.30577	0.000878316	0.00992011	1.77155	0
ENSMUSG00000010830.8	Kdelr3	181.794	-0.878729	0.332101	0.000882891	0.00994628	-1.83876	0
ENSMUSG00000027435.8	Cd93	1578.25	0.875123	0.329471	0.000882953	0.00994628	1.83416	0
ENSMUSG00000022914.17	Brwd1	2158.01	-0.491198	0.163114	0.000887147	0.00997834	-1.40561	0
ENSMUSG00000094626.1	Tmem121b	159.659	-0.731682	0.263901	0.000887039	0.00997834	-1.66057	0
ENSMUSG00000078490.10	Cfap74	206.176	-0.755036	0.275341	0.000889936	0.00999866	-1.68767	0
ENSMUSG00000040183.13	Ankrd6	227.747	-0.73868	0.267639	0.00089481	0.0100468	-1.66865	0
ENSMUSG00000003934.5	Efnb3	363.575	-0.676315	0.240042	0.000897375	0.0100625	-1.59805	0
ENSMUSG00000042766.17	Trim46	225.557	-0.980322	0.382006	0.000897089	0.0100625	-1.97291	0
ENSMUSG00000020407.13	Upp1	595	-0.697807	0.250126	0.00090085	0.0100882	-1.62204	0
ENSMUSG00000027131.3	Emc4	685.443	0.52213	0.175534	0.00090281	0.0101036	1.43607	0
ENSMUSG00000026158.11	Ogfrl1	186.055	0.75372	0.274255	0.000905144	0.0101165	1.68613	0
ENSMUSG00000116287.1	Gm3924	79.8102	-0.953776	0.36906	0.000904875	0.0101165	-1.93694	0
ENSMUSG00000031600.11	Vps37a	3956.09	-0.516007	0.173388	0.000905738	0.0101165	-1.42999	0
ENSMUSG00000030539.13	Sema4b	605.138	-0.506011	0.16937	0.000906756	0.0101213	-1.42012	0
ENSMUSG00000040883.18	Tmem205	432.573	0.713159	0.256534	0.000908379	0.0101328	1.63939	0
ENSMUSG00000015214.14	Mtmr1	691.281	0.513648	0.172251	0.000911044	0.010155	1.42766	0
ENSMUSG00000020576.10	Nbas	2375.05	-0.666414	0.237618	0.000915855	0.0101917	-1.58712	0
ENSMUSG00000038264.8	Sema7a	594.654	0.566074	0.193585	0.000916036	0.0101917	1.48049	0
ENSMUSG00000024909.15	Efemp2	250.03	-0.815078	0.303875	0.000918641	0.0102141	-1.75939	0
ENSMUSG00000055003.14	Lrtm2	94.4995	-0.944714	0.36473	0.00092667	0.0102967	-1.92481	0
ENSMUSG00000020099.8	Unc5b	472.013	0.556379	0.189914	0.00092909	0.0103148	1.47057	0
ENSMUSG00000045896.14	Paip2b	1786.57	-0.599614	0.208279	0.000929507	0.0103148	-1.51531	0
ENSMUSG00000045827.10	Serpinb9	395.533	-0.671694	0.23912	0.000934547	0.010364	-1.59294	0
ENSMUSG00000031818.12	Cox4i1	4806.43	0.586006	0.202467	0.000941888	0.0104387	1.50108	0
ENSMUSG00000035674.13	Ndufa3	752.975	0.692608	0.248693	0.000951609	0.010526	1.6162	0
ENSMUSG00000056215.13	Lrguk	352.414	0.716387	0.259444	0.000951263	0.010526	1.64306	0
ENSMUSG00000031367.15	Ap1s2	6401.81	-0.714688	0.256893	0.000956278	0.0105708	-1.64113	0
ENSMUSG00000028402.18	Mpdz	1154.94	0.591776	0.205249	0.000958949	0.0105867	1.5071	0
ENSMUSG00000003228.9	Grk5	1535.88	-0.464721	0.15432	0.000965317	0.0106502	-1.38005	0
ENSMUSG00000041168.10	Lonp1	1801.94	0.447908	0.147719	0.000968538	0.010672	1.36406	0
ENSMUSG00000032078.17	Zpr1	577.494	0.531921	0.180819	0.000969796	0.010679	1.44585	0
ENSMUSG00000026988.15	Wdsub1	699.727	-0.677662	0.243349	0.000974882	0.0107281	-1.59955	0
ENSMUSG00000022186.14	Oxct1	3588.81	0.66439	0.236931	0.000978553	0.0107616	1.5849	0
ENSMUSG00000018846.8	Pank3	3062.69	-0.605263	0.212044	0.000983298	0.0108068	-1.52126	0
ENSMUSG00000036959.15	Bcorl1	284.428	-0.770347	0.286011	0.000992112	0.0108967	-1.70568	0
ENSMUSG00000026452.15	Syt2	190.915	-0.822783	0.310992	0.000995239	0.010924	-1.76881	0
ENSMUSG00000069835.10	Sat2	105.616	-0.75478	0.278971	0.000997772	0.0109449	-1.68737	0
ENSMUSG00000059326.7	Csf2ra	457.327	-0.844155	0.322133	0.00100829	0.0110532	-1.79521	0
ENSMUSG00000004317.14	Clcn5	644.097	-0.736175	0.271039	0.00101679	0.011125	-1.66575	0
ENSMUSG00000032245.12	Cln6	2555.13	-0.704062	0.256384	0.00101666	0.011125	-1.62908	0
ENSMUSG00000021190.14	Lgmn	647.193	0.531311	0.181527	0.00101925	0.0111448	1.44524	0
ENSMUSG00000073236.4	2500004C02Rik	144.804	0.70528	0.256679	0.0010211	0.0111579	1.63046	0
ENSMUSG00000018593.13	Sparc	8731.48	0.745223	0.274849	0.00102644	0.0112092	1.67623	0
ENSMUSG00000038119.15	Cdon	873.686	-0.734775	0.271364	0.00102749	0.0112134	-1.66414	0
ENSMUSG00000003438.17	Timm50	548.945	0.705062	0.256939	0.00103038	0.0112378	1.63021	0
ENSMUSG00000037685.15	Atp8a1	1176.16	0.479964	0.161164	0.00103313	0.0112606	1.39471	0
ENSMUSG00000005881.13	Ergic3	2679.81	0.449485	0.149306	0.00103481	0.0112718	1.36555	0
ENSMUSG00000023089.12	Ndufa5	634.011	0.573453	0.199505	0.00104433	0.0113682	1.48808	0
ENSMUSG00000028980.14	H6pd	905.176	-0.529796	0.181794	0.00105252	0.0114357	-1.44373	0
ENSMUSG00000029516.19	Cit	295.136	-0.907799	0.355416	0.00106437	0.0115497	-1.87618	0
ENSMUSG00000045930.3	Clec14a	731.845	0.723719	0.266212	0.00106522	0.0115516	1.65143	0
ENSMUSG00000032263.14	Bckdhb	438.691	0.678494	0.245867	0.00106952	0.011591	1.60047	0
ENSMUSG00000031871.9	Cdh5	1328.69	0.718019	0.264043	0.00107687	0.0116581	1.64492	0
ENSMUSG00000079679.3	Vwde	714.893	-0.641571	0.230119	0.00107707	0.0116581	-1.56003	0
ENSMUSG00000022816.11	Fstl1	1011.37	0.806639	0.305689	0.00107962	0.0116782	1.74913	0
ENSMUSG00000021611.9	Tert	181.294	-0.677935	0.247247	0.00108908	0.0117732	-1.59985	0
ENSMUSG00000035783.9	Acta2	339.492	0.796144	0.30108	0.0010901	0.0117768	1.73645	0
ENSMUSG00000034353.14	Ramp1	310.846	-0.610229	0.21674	0.00109516	0.0118166	-1.5265	0
ENSMUSG00000048537.16	Phldb1	698.871	0.638721	0.228937	0.00109455	0.0118166	1.55695	0
ENSMUSG00000015243.4	Abca1	3783.63	-0.830989	0.319512	0.0010968	0.0118268	-1.7789	0
ENSMUSG00000006095.12	Tbcb	924.196	0.652049	0.235204	0.00110664	0.011918	1.5714	0
ENSMUSG00000020696.18	Rffl	214.022	-0.646169	0.233117	0.00111053	0.0119523	-1.56501	0
ENSMUSG00000042729.11	Wdr74	354.478	0.597	0.211205	0.00111165	0.0119569	1.51257	0
ENSMUSG00000023277.13	Twf2	388.991	-0.733	0.273457	0.0011249	0.0120843	-1.66209	0
ENSMUSG00000033444.14	Specc1l	3419.97	-0.474423	0.16075	0.00113125	0.0121372	-1.38936	0
ENSMUSG00000030110.13	Ret	3576.4	-0.60396	0.21511	0.00113325	0.0121511	-1.51988	0
ENSMUSG00000026827.12	Gpd2	2394.01	-0.741087	0.277565	0.0011396	0.0122039	-1.67143	0
ENSMUSG00000019775.17	Rgs17	543.724	-0.664443	0.242038	0.00114453	0.0122414	-1.58496	0
ENSMUSG00000046470.5	Sox18	390.702	0.871498	0.340122	0.00114922	0.0122839	1.82956	0
ENSMUSG00000030259.12	Rassf8	649.402	0.637973	0.229993	0.00115373	0.0123244	1.55614	0
ENSMUSG00000041506.15	Rrp9	340.056	0.635471	0.229519	0.00117358	0.0125053	1.55344	0
ENSMUSG00000055150.15	Zfp78	154.723	-0.755012	0.285694	0.00117987	0.0125567	-1.68765	0
ENSMUSG00000026042.16	Col5a2	583.144	0.855413	0.333518	0.0011846	0.012591	1.80928	0
ENSMUSG00000041658.12	Rragb	1362.58	-0.454961	0.153724	0.00118516	0.012591	-1.37075	0
ENSMUSG00000045377.5	Tmem88	208.849	0.8113	0.311896	0.00118529	0.012591	1.75479	0
ENSMUSG00000038880.13	Mrps34	631.548	0.541472	0.188975	0.00118887	0.0126212	1.45546	0
ENSMUSG00000030095.10	Tmem43	761.608	0.475313	0.161831	0.0011932	0.0126437	1.39022	0
ENSMUSG00000067847.13	Romo1	1011.45	0.659435	0.240788	0.00119799	0.0126787	1.57946	0
ENSMUSG00000078886.12	Gm2026	179.621	0.891657	0.352021	0.0011995	0.0126869	1.85531	0
ENSMUSG00000039865.8	Slc44a3	1203.15	-0.618123	0.223289	0.00120765	0.0127573	-1.53488	0
ENSMUSG00000092060.4	Bend4	103.983	-0.90131	0.357148	0.00120758	0.0127573	-1.86776	0
ENSMUSG00000035021.13	Baz1a	275.708	0.723116	0.27048	0.00121109	0.0127858	1.65074	0
ENSMUSG00000020604.13	Arsg	238.244	0.864165	0.3391	0.00121476	0.0128167	1.82029	0
ENSMUSG00000024594.9	Prrc1	2543.93	-0.559943	0.197495	0.00121716	0.012834	-1.47421	0
ENSMUSG00000038860.15	Garnl3	176.139	0.774946	0.29673	0.00122616	0.012921	1.71113	0
ENSMUSG00000054150.12	Syne3	105.022	-0.7693	0.293053	0.00122927	0.0129379	-1.70444	0
ENSMUSG00000118239.1	Gm50107	90.4769	-0.787418	0.302781	0.00122918	0.0129379	-1.72598	0
ENSMUSG00000049482.16	Ctu2	317.516	0.593744	0.212392	0.00123308	0.01297	1.50916	0
ENSMUSG00000035045.17	Zc3h12b	105.667	-1.04473	0.434882	0.00124314	0.0130678	-2.06298	0
ENSMUSG00000075467.4	Dnlz	431.131	0.704955	0.263546	0.00125592	0.0131941	1.63009	0
ENSMUSG00000029156.11	Sgcb	700.226	0.50896	0.176879	0.0012787	0.0134087	1.42302	0
ENSMUSG00000030611.10	Mrps11	432.403	0.715314	0.269418	0.00128711	0.0134804	1.64184	0
ENSMUSG00000034413.14	Neurl1b	235.742	-0.866225	0.344019	0.00128634	0.0134804	-1.82289	0
ENSMUSG00000036864.16	Proser3	123.671	-0.716082	0.270431	0.00128985	0.0135009	-1.64272	0
ENSMUSG00000003812.13	Dnase2a	164.864	-0.632134	0.231018	0.00129577	0.013543	-1.54986	0
ENSMUSG00000021708.17	Rasgrf2	646.665	-0.656691	0.242395	0.00129535	0.013543	-1.57646	0
ENSMUSG00000085037.1	4933421O10Rik	464.736	-0.496914	0.172318	0.00129624	0.013543	-1.41119	0
ENSMUSG00000074793.10	Hspa12b	206.663	-0.759268	0.29124	0.00129743	0.0135472	-1.69263	0
ENSMUSG00000032186.15	Tmod2	7157.98	0.525196	0.184049	0.0013069	0.0136377	1.43913	0
ENSMUSG00000000320.10	Alox12	215.266	0.656679	0.242398	0.00131588	0.0137231	1.57645	0
ENSMUSG00000073102.7	Drc1	348.401	-0.863779	0.344988	0.00133501	0.0139056	-1.8198	0
ENSMUSG00000028919.11	Arhgef19	169.299	-0.787227	0.306644	0.0013382	0.0139305	-1.72575	0
ENSMUSG00000029413.14	Naaa	285.414	0.582713	0.2097	0.00134613	0.0140045	1.49766	0
ENSMUSG00000031119.4	Gpc4	1882.12	-0.696001	0.262389	0.00135307	0.0140597	-1.62001	0
ENSMUSG00000036158.12	Prickle1	527.218	-0.598701	0.217216	0.00135424	0.0140632	-1.51435	0
ENSMUSG00000001542.7	Ell2	1831.15	-0.52336	0.184576	0.00135971	0.0141115	-1.4373	0
ENSMUSG00000036285.10	Noa1	387.972	0.539958	0.191285	0.00136273	0.0141258	1.45393	0
ENSMUSG00000055839.6	Elob	1356.45	0.654991	0.242934	0.00136773	0.014169	1.57461	0
ENSMUSG00000028673.10	Fuca1	1716.32	0.602824	0.219196	0.00137266	0.0142115	1.51869	0
ENSMUSG00000023387.8	Kcnk16	8745.04	-0.574538	0.207204	0.00137668	0.0142445	-1.4892	0
ENSMUSG00000013089.15	Etv5	842.691	0.70208	0.26527	0.00138193	0.0142853	1.62685	0
ENSMUSG00000051980.13	Casr	1742.62	-0.602101	0.219499	0.00138228	0.0142853	-1.51793	0
ENSMUSG00000003038.15	Hmgn2	4956.09	-0.459894	0.158493	0.00138346	0.0142888	-1.37544	0
ENSMUSG00000030760.14	Acer3	195.319	0.718825	0.273633	0.00138803	0.0143274	1.64584	0
ENSMUSG00000021943.7	Gdf10	234.763	0.935823	0.383666	0.00139879	0.0144211	1.91298	0
ENSMUSG00000053746.8	Ptrh1	85.2401	0.861025	0.345479	0.0014027	0.0144527	1.81633	0
ENSMUSG00000055044.12	Pdlim1	135.675	0.917205	0.374398	0.00140742	0.0144824	1.88845	0
ENSMUSG00000026926.14	Pmpca	1876.08	0.486174	0.16939	0.00141517	0.0145462	1.40073	0
ENSMUSG00000022885.16	St6gal1	1673.39	-0.517139	0.18273	0.0014167	0.0145532	-1.43111	0
ENSMUSG00000035049.4	Rrp12	374.877	0.666267	0.249234	0.00142087	0.0145873	1.58696	0
ENSMUSG00000037148.8	Arhgap10	130	0.717884	0.273806	0.00142432	0.0145965	1.64477	0
ENSMUSG00000046949.16	Nqo2	451.398	0.621564	0.228887	0.00142334	0.0145965	1.53854	0
ENSMUSG00000052915.14	Msl1	2030.86	-0.434119	0.148497	0.00142403	0.0145965	-1.35109	0
ENSMUSG00000002661.14	Alkbh7	250.887	0.702592	0.267058	0.00142659	0.0146088	1.62743	0
ENSMUSG00000025208.9	Mrpl43	636.702	0.542027	0.19335	0.00142722	0.0146088	1.45602	0
ENSMUSG00000024901.15	Peli3	287.215	-0.755644	0.29359	0.00142893	0.0146167	-1.68839	0
ENSMUSG00000033295.14	Ptprf	8766.01	-0.495593	0.173997	0.0014297	0.0146167	-1.4099	0
ENSMUSG00000033597.9	Caskin1	95.1245	-1.10209	0.479796	0.0014335	0.0146468	-2.14666	0
ENSMUSG00000020183.11	Cpm	340.75	-0.675783	0.254929	0.00144817	0.0147854	-1.59746	0
ENSMUSG00000031015.8	Swap70	348.601	0.733577	0.282628	0.00144879	0.0147854	1.66276	0
ENSMUSG00000026609.15	Ush2a	980.811	-0.512183	0.181259	0.00146042	0.0148776	-1.42621	0
ENSMUSG00000087231.7	E230016M11Rik	94.7712	0.802446	0.318107	0.00146241	0.014889	1.74406	0
ENSMUSG00000025651.14	Uqcrc1	2593.68	0.429277	0.146883	0.00146929	0.0149413	1.34656	0
ENSMUSG00000027546.15	Atp9a	2905.32	-0.481388	0.168591	0.00147247	0.0149559	-1.39609	0
ENSMUSG00000027834.15	Serpini1	651.276	-0.795528	0.315163	0.00147674	0.0149903	-1.73571	0
ENSMUSG00000073147.3	5031425E22Rik	647.852	-0.583626	0.2129	0.00147854	0.0149998	-1.49861	0
ENSMUSG00000045871.5	Slitrk6	3103.12	-0.745764	0.290434	0.00148085	0.0150143	-1.67686	0
ENSMUSG00000042680.8	Garem1	93.0704	0.871663	0.353201	0.00149308	0.0151204	1.82977	0
ENSMUSG00000083594.1	Gm13722	67.1323	-0.981163	0.411011	0.00149806	0.0151602	-1.97406	0
ENSMUSG00000046613.19	Vwa5b2	5126.29	0.413132	0.141081	0.00152677	0.0154342	1.33157	0
ENSMUSG00000030583.16	Sipa1l3	2404.63	-0.553519	0.200376	0.00153109	0.0154688	-1.46766	0
ENSMUSG00000043505.8	Gimap5	73.3525	0.856308	0.3472	0.00153586	0.0155079	1.8104	0
ENSMUSG00000046402.10	Rbp1	72.2689	1.00417	0.427136	0.00153802	0.0155205	2.00579	0
ENSMUSG00000061143.15	Maml3	1169.49	-0.537632	0.193971	0.0015466	0.0155888	-1.45159	0
ENSMUSG00000025007.13	Aldh18a1	1652.29	-0.494371	0.17606	0.00156165	0.0157312	-1.40871	0
ENSMUSG00000044258.10	Ctla2a	317.198	0.697348	0.267748	0.0015708	0.0158141	1.62152	0
ENSMUSG00000052062.14	Pard3b	355.405	0.576083	0.210632	0.00157331	0.0158207	1.4908	0
ENSMUSG00000061288.13	Taok3	1502.42	-0.540573	0.195343	0.00157274	0.0158207	-1.45455	0
ENSMUSG00000093587.3	Gm20554	156.544	-0.773408	0.307538	0.00159036	0.0159828	-1.7093	0
ENSMUSG00000044816.10	D630023F18Rik	43.7447	1.00415	0.429152	0.00159355	0.0160055	2.00576	0
ENSMUSG00000046070.9	Igfals	802.115	-0.918732	0.385273	0.00159921	0.0160436	-1.89045	0
ENSMUSG00000022272.17	Myo10	1749.33	-0.597434	0.22117	0.00160201	0.0160622	-1.51302	0
ENSMUSG00000024059.10	Clip4	110.721	-1.0919	0.487204	0.00160386	0.0160714	-2.13155	0
ENSMUSG00000030616.16	Sytl2	115.776	-0.767802	0.305603	0.00161006	0.0161053	-1.70267	0
ENSMUSG00000033653.18	Vps8	1046.61	-0.559463	0.204516	0.00161895	0.0161847	-1.47372	0
ENSMUSG00000082286.10	Pisd-ps1	1118.32	-0.965477	0.412625	0.00162321	0.0162179	-1.95271	0
ENSMUSG00000041354.16	Rgl2	966.784	0.709776	0.275369	0.00162569	0.0162332	1.63555	0
ENSMUSG00000020175.15	Rab36	638.67	-0.538709	0.195284	0.00162759	0.0162333	-1.45267	0
ENSMUSG00000024423.6	Impact	1791.05	-0.778572	0.311453	0.00162687	0.0162333	-1.71543	0
ENSMUSG00000025869.11	Nop16	319.967	0.642143	0.242664	0.00163722	0.0163199	1.56065	0
ENSMUSG00000015222.18	Map2	7107.26	-0.438863	0.155445	0.0016404	0.0163421	-1.35554	0
ENSMUSG00000057286.6	St6galnac2	143.591	-1.01849	0.444641	0.00164778	0.016406	-2.02579	0
ENSMUSG00000042349.13	Ikbke	213.741	-1.01234	0.442028	0.00166066	0.0165246	-2.01719	0
ENSMUSG00000048897.15	Zfp710	633.168	-0.485605	0.171601	0.00167535	0.0166612	-1.40017	0
ENSMUSG00000001707.8	Eef1e1	299.648	0.601197	0.224225	0.00168233	0.0167209	1.51697	0
ENSMUSG00000028743.7	Akr7a5	464.626	0.641114	0.243375	0.00169022	0.0167896	1.55953	0
ENSMUSG00000074063.10	Osgin1	132.777	-0.721532	0.283881	0.00169484	0.0168159	-1.64893	0
ENSMUSG00000025505.16	Tmem80	542.84	0.51336	0.184784	0.0016965	0.0168227	1.42737	0
ENSMUSG00000064043.13	Trerf1	633.435	-0.601197	0.224901	0.00169977	0.0168455	-1.51697	0
ENSMUSG00000034336.3	Ina	542.521	-0.733627	0.290128	0.00170422	0.01687	-1.66281	0
ENSMUSG00000004032.10	Gstm5	497.886	0.593351	0.221574	0.00171247	0.0169419	1.50875	0
ENSMUSG00000038510.12	Rpf2	358.904	0.542298	0.19796	0.00172717	0.0170677	1.45629	0
ENSMUSG00000040605.7	Bace2	7665.25	0.553913	0.202951	0.00172961	0.0170819	1.46806	0
ENSMUSG00000002416.13	Ndufb2	1074.58	0.605915	0.227395	0.00173878	0.0171625	1.52194	0
ENSMUSG00000059456.13	Ptk2b	881.412	-0.595235	0.222889	0.0017418	0.0171825	-1.51072	0
ENSMUSG00000049295.17	Zfp219	534.578	-0.537349	0.196442	0.00174325	0.0171869	-1.4513	0
ENSMUSG00000006958.14	Chrd	214.037	0.755947	0.302211	0.00174982	0.0172319	1.68874	0
ENSMUSG00000039253.7	Fn3krp	268.398	0.667196	0.257181	0.00174899	0.0172319	1.58798	0
ENSMUSG00000022956.11	Atp5o	1759.02	0.577206	0.214277	0.00175817	0.0172942	1.49196	0
ENSMUSG00000023064.4	Sncg	483.721	1.00473	0.437563	0.00176065	0.0172988	2.00657	0
ENSMUSG00000034118.15	Tpst1	565.07	-0.489307	0.17544	0.00176049	0.0172988	-1.40377	0
ENSMUSG00000034563.16	Ccpg1	6224.74	-0.647423	0.248813	0.00176841	0.0173513	-1.56637	0
ENSMUSG00000074807.3	Gm10762	243.853	0.674227	0.26113	0.00176872	0.0173513	1.59574	0
ENSMUSG00000023795.16	Pisd-ps2	242.981	-0.943667	0.407546	0.00177692	0.0173988	-1.92341	0
ENSMUSG00000049532.11	Sall2	312.787	-0.850596	0.353869	0.00177673	0.0173988	-1.80325	0
ENSMUSG00000074364.6	Ehd2	665.179	0.740898	0.294772	0.00177895	0.0173988	1.67122	0
ENSMUSG00000053094.15	Tmem248	2503.38	-0.583801	0.217421	0.00178068	0.0174058	-1.49879	0
ENSMUSG00000031934.14	Panx1	144.455	0.790056	0.321728	0.00178741	0.0174617	1.72914	0
ENSMUSG00000023951.17	Vegfa	12081	0.573809	0.213138	0.00178962	0.0174732	1.48845	0
ENSMUSG00000051951.5	Xkr4	176.488	0.708822	0.278409	0.00179129	0.0174732	1.63447	0
ENSMUSG00000003346.14	Abhd17a	978.744	0.532241	0.194378	0.00179386	0.0174848	1.44617	0
ENSMUSG00000050315.14	Synpo2	80.1016	0.892305	0.380152	0.00179618	0.0174974	1.85614	0
ENSMUSG00000025465.13	Echs1	1180.25	0.487249	0.174613	0.00180078	0.0175223	1.40177	0
ENSMUSG00000107002.1	0610012G03Rik	317.918	0.618286	0.234731	0.0018136	0.017637	1.53505	0
ENSMUSG00000005354.16	Txn2	1104.5	0.505499	0.182833	0.00181627	0.017653	1.41961	0
ENSMUSG00000097927.2	Gm6999	404.829	-0.57659	0.215684	0.00182473	0.0177252	-1.49132	0
ENSMUSG00000037772.13	Mrpl23	58.2169	1.00308	0.442723	0.00182582	0.0177258	2.00427	0
ENSMUSG00000020773.11	Trim47	182.408	0.844756	0.351924	0.00184159	0.0178687	1.79596	0
ENSMUSG00000030884.12	Uqcrc2	3755.24	0.45898	0.163101	0.00184856	0.0179056	1.37457	0
ENSMUSG00000036327.18	Qsox2	1439.72	-0.496655	0.179643	0.00184779	0.0179056	-1.41094	0
ENSMUSG00000038256.15	Bcl9	1603.88	-0.585696	0.220501	0.00185129	0.0179122	-1.50076	0
ENSMUSG00000015846.15	Rxra	991.595	-0.546098	0.201805	0.00186109	0.0179969	-1.46013	0
ENSMUSG00000024862.16	Klc2	1264.58	0.547738	0.202938	0.00187147	0.0180597	1.46179	0
ENSMUSG00000057058.16	Skap1	1107.34	-0.466927	0.166985	0.00187181	0.0180597	-1.38216	0
ENSMUSG00000033767.14	Tmem131l	1368.52	-0.565579	0.211344	0.00188777	0.0181933	-1.47998	0
ENSMUSG00000030869.11	Ndufab1	891.071	0.551185	0.204379	0.00189347	0.0182379	1.46529	0
ENSMUSG00000039601.16	Rcan2	1190.53	-0.595936	0.225477	0.00189509	0.0182433	-1.51145	0
ENSMUSG00000017405.14	Nek8	134.129	0.803763	0.332125	0.00190944	0.0183712	1.74565	0
ENSMUSG00000056258.9	Kcnq3	100.592	1.05948	0.477005	0.00191326	0.0183975	2.08418	0
ENSMUSG00000004952.13	Rasa4	79.5615	0.87944	0.374471	0.00191437	0.0183979	1.83966	0
ENSMUSG00000038056.15	Kmt2c	2728.09	-0.430849	0.152207	0.00191828	0.0184251	-1.34803	0
ENSMUSG00000108207.2	1810059H22Rik	113.971	-0.672073	0.26369	0.00192628	0.0184916	-1.59336	0
ENSMUSG00000023723.17	Mrps23	912.508	0.543961	0.20158	0.00193196	0.0185358	1.45797	0
ENSMUSG00000061947.10	Serpina10	2157.74	-0.486199	0.175623	0.00193816	0.0185849	-1.40075	0
ENSMUSG00000034211.14	Mrps17	865.612	0.560502	0.209408	0.00194526	0.0186113	1.47478	0
ENSMUSG00000040714.14	Klc3	497.971	-0.560002	0.209549	0.00194441	0.0186113	-1.47427	0
ENSMUSG00000110276.1	Gm45330	122.848	-0.807164	0.33537	0.00194362	0.0186113	-1.74977	0
ENSMUSG00000061802.6	Armc4	58.9301	-0.960425	0.421122	0.00195999	0.0187314	-1.94588	0
ENSMUSG00000025790.14	Slco3a1	761.243	0.569926	0.214083	0.00196812	0.0187852	1.48445	0
ENSMUSG00000034910.5	Pygo1	169.957	-0.772937	0.316915	0.00196809	0.0187852	-1.70874	0
ENSMUSG00000054823.16	Nsd3	2649.89	-0.418168	0.147582	0.00196892	0.0187852	-1.33623	0
ENSMUSG00000040562.12	Gstm2	143.805	-0.805294	0.334995	0.00197651	0.0188472	-1.7475	0
ENSMUSG00000025432.11	Avil	159.255	0.939773	0.41097	0.00199046	0.0189697	1.91823	0
ENSMUSG00000025876.15	Unc5a	939.813	-0.507347	0.186058	0.00200271	0.0190546	-1.42143	0
ENSMUSG00000028222.2	Calb1	1445.89	0.778872	0.320503	0.00200246	0.0190546	1.71579	0
ENSMUSG00000028461.12	Ccdc107	305.254	0.684564	0.271255	0.00200214	0.0190546	1.60722	0
ENSMUSG00000026380.10	Tfcp2l1	58.9917	-0.888448	0.380928	0.00201491	0.0191507	-1.85118	0
ENSMUSG00000035640.18	Cbarp	1823.11	-0.774269	0.319297	0.00201504	0.0191507	-1.71032	0
ENSMUSG00000033955.13	Tnks1bp1	1084.99	-0.568941	0.214675	0.00201722	0.0191608	-1.48343	0
ENSMUSG00000022235.15	Cmbl	206.249	-0.735131	0.299251	0.00202175	0.0191785	-1.66455	0
ENSMUSG00000063506.14	Arhgap22	54.1169	1.16717	0.55257	0.00202244	0.0191785	2.2457	0
ENSMUSG00000021772.15	Nkiras1	570.549	0.566415	0.213536	0.00203958	0.0192984	1.48084	0
ENSMUSG00000039680.10	Mrps6	196.864	0.65672	0.257782	0.00203903	0.0192984	1.57649	0
ENSMUSG00000057375.13	Yipf1	981.212	0.452022	0.162114	0.00203909	0.0192984	1.36796	0
ENSMUSG00000051403.9	Ppp1r37	3335.23	-0.397709	0.139827	0.00204816	0.0193475	-1.31741	0
ENSMUSG00000028657.14	Ppt1	2054.64	0.502238	0.184228	0.00206352	0.0194819	1.41641	0
ENSMUSG00000116165.1	Pdxp	218.01	0.734786	0.298481	0.00206574	0.0194921	1.66415	0
ENSMUSG00000001416.13	Cct3	2829.57	0.571823	0.216969	0.00207526	0.0195604	1.4864	0
ENSMUSG00000028273.15	Pdlim5	1034.22	0.548351	0.205564	0.00208677	0.019658	1.46241	0
ENSMUSG00000050493.8	Fam167b	155.831	0.800452	0.335255	0.00209499	0.0197139	1.74165	0
ENSMUSG00000003955.8	Fam162a	384.207	0.628452	0.244827	0.00211526	0.0198674	1.54591	0
ENSMUSG00000020547.5	Bzw2	547.568	0.504275	0.185699	0.00211438	0.0198674	1.41841	0
ENSMUSG00000072941.5	Sod3	70.9631	0.860837	0.368156	0.00211262	0.0198674	1.81609	0
ENSMUSG00000034462.9	Pkd2	1891.68	0.42574	0.151134	0.00212594	0.0199394	1.34326	0
ENSMUSG00000028759.13	Hp1bp3	4240.09	-0.42337	0.151166	0.00213127	0.0199675	-1.34106	0
ENSMUSG00000033557.17	Fam20b	3343.11	-0.432605	0.155047	0.0021377	0.0200105	-1.34967	0
ENSMUSG00000032125.20	Robo4	706.247	0.652918	0.257489	0.00214959	0.0201062	1.57235	0
ENSMUSG00000061559.15	Wdr61	1225.99	0.566621	0.215191	0.0021602	0.0201945	1.48105	0
ENSMUSG00000034274.11	Thoc5	641.333	0.518484	0.192799	0.00216511	0.0202293	1.43245	0
ENSMUSG00000043279.9	Trim56	1363.91	-0.415903	0.148457	0.00217461	0.020307	-1.33413	0
ENSMUSG00000097587.2	4930578M01Rik	178.584	-0.781354	0.328869	0.00217787	0.0203264	-1.71874	0
ENSMUSG00000033478.5	Fam160b1	912.58	-0.508194	0.188486	0.00218579	0.0203892	-1.42227	0
ENSMUSG00000054280.14	Prr14l	1207.83	-0.61409	0.239376	0.00219012	0.0204066	-1.53059	0
ENSMUSG00000078444.3	Gm10941	80.2979	-0.954293	0.431126	0.00219123	0.0204066	-1.93763	0
ENSMUSG00000028443.6	Nudt2	198.268	0.59608	0.230046	0.00219354	0.020417	1.5116	0
ENSMUSG00000049922.8	Slc35c1	591.4	-0.738716	0.305319	0.00221064	0.020565	-1.66869	0
ENSMUSG00000068854.7	H2bc21	372.457	-0.620137	0.242855	0.00221451	0.0205899	-1.53702	0
ENSMUSG00000068921.14	Dap3	1234	0.456954	0.165875	0.0022219	0.0206475	1.37264	0
ENSMUSG00000021103.12	Mnat1	506.424	0.488273	0.17984	0.00224147	0.0207955	1.40276	0
ENSMUSG00000027202.12	Slc12a1	69.3014	1.10106	0.520082	0.00225018	0.020865	2.14512	0
ENSMUSG00000024962.13	Vegfb	475.761	-0.5399	0.20395	0.00225776	0.0209126	-1.45387	0
ENSMUSG00000009035.15	Tmem184b	2230.12	-0.450013	0.163561	0.00227496	0.0210605	-1.36605	0
ENSMUSG00000031327.10	Chic1	9459.6	-0.695618	0.284229	0.00228083	0.0211035	-1.61958	0
ENSMUSG00000045362.8	Tnfrsf26	40.4476	1.02684	0.475387	0.00230171	0.021276	2.03756	0
ENSMUSG00000057666.18	Gapdh	6578.79	0.4356	0.157571	0.00230196	0.021276	1.35247	0
ENSMUSG00000036867.7	Smad6	84.6452	0.770955	0.32354	0.00230447	0.0212878	1.7064	0
ENSMUSG00000024036.16	Slc37a1	1524.21	-0.434083	0.156996	0.00231095	0.0213247	-1.35105	0
ENSMUSG00000032523.11	Hhatl	59.5736	-1.16236	0.581569	0.00231004	0.0213247	-2.23824	0
ENSMUSG00000039137.18	Whrn	1140.26	0.474948	0.174648	0.00231389	0.0213404	1.38987	0
ENSMUSG00000027222.14	Pex16	468.168	0.653515	0.261046	0.00231678	0.0213554	1.573	0
ENSMUSG00000025579.14	Gaa	3392.05	-0.52321	0.196979	0.00232173	0.0213857	-1.43715	0
ENSMUSG00000036853.5	Mcoln3	140.728	-0.942959	0.426648	0.00232256	0.0213857	-1.92247	0
ENSMUSG00000037846.18	Rtkn2	137.702	-0.771474	0.325742	0.00233247	0.0214655	-1.70701	0
ENSMUSG00000033938.5	Ndufb7	994.469	0.534029	0.20205	0.00234058	0.021517	1.44797	0
ENSMUSG00000040466.16	Blvrb	148.418	0.686165	0.278661	0.00233968	0.021517	1.609	0
ENSMUSG00000033540.18	Idua	357.334	-0.629236	0.249747	0.00234341	0.0215315	-1.54675	0
ENSMUSG00000059714.13	Flot1	757.713	-0.535049	0.203057	0.00234771	0.0215594	-1.44899	0
ENSMUSG00000021113.5	Snapc1	1048.68	0.430477	0.155685	0.00236384	0.021696	1.34768	0
ENSMUSG00000030022.14	Adamts9	225.251	0.836604	0.362824	0.00236816	0.0217124	1.78584	0
ENSMUSG00000072653.14	Zfp783	203.393	-0.70828	0.29191	0.00236724	0.0217124	-1.63386	0
ENSMUSG00000001672.14	Marveld3	856.483	-0.548292	0.209604	0.00237258	0.0217412	-1.46235	0
ENSMUSG00000034573.14	Ptpn13	826.834	0.484926	0.179713	0.00237385	0.0217413	1.39951	0
ENSMUSG00000056313.5	Tcim	612.663	0.605284	0.237127	0.00237718	0.0217602	1.52128	0
ENSMUSG00000005981.11	Trap1	1160.42	0.525971	0.198904	0.00239632	0.0219218	1.4399	0
ENSMUSG00000026425.15	Srgap2	470.141	0.519071	0.19566	0.0023974	0.0219218	1.43303	0
ENSMUSG00000000915.15	Hip1r	2192.88	0.483247	0.179195	0.00239995	0.0219236	1.39789	0
ENSMUSG00000018381.15	Abi3	143.301	0.861996	0.380626	0.00240335	0.0219411	1.81755	0
ENSMUSG00000048583.16	Igf2	74.3622	-0.968667	0.452902	0.00241115	0.0220006	-1.95703	0
ENSMUSG00000073007.10	Tent5d	93.522	-0.932538	0.424228	0.00242658	0.0221297	-1.90863	0
ENSMUSG00000028648.13	Ndufs5	1307.31	0.550919	0.211163	0.00242824	0.022133	1.46502	0
ENSMUSG00000000532.11	Acvr1b	868.167	-0.440916	0.160953	0.00243728	0.0222036	-1.35747	0
ENSMUSG00000111443.1	Gm46123	64.3438	-1.16936	0.583798	0.00244459	0.0222465	-2.24911	0
ENSMUSG00000024873.7	Cnih2	38.6216	-1.07795	0.514822	0.00245241	0.0223059	-2.11103	0
ENSMUSG00000045092.8	S1pr1	494.25	0.892224	0.398966	0.00245728	0.0223383	1.85604	0
ENSMUSG00000045064.5	Zc2hc1c	390.372	-0.558405	0.215532	0.00246471	0.0223821	-1.47264	0
ENSMUSG00000057895.11	Zfp105	78.8579	-0.802134	0.346469	0.00246434	0.0223821	-1.74368	0
ENSMUSG00000019737.14	Syne4	535.76	-0.743611	0.314383	0.00248238	0.0225307	-1.67436	0
ENSMUSG00000038843.18	Gcnt1	56.5225	-1.03205	0.49235	0.00248481	0.0225408	-2.04493	0
ENSMUSG00000023990.18	Tfeb	132.076	-0.703453	0.291297	0.00249497	0.022609	-1.6284	0
ENSMUSG00000039270.9	Megf9	3191.08	0.591889	0.232754	0.00249393	0.022609	1.50722	0
ENSMUSG00000002032.17	Tmem25	398.426	0.512158	0.193576	0.00250393	0.0226782	1.42618	0
ENSMUSG00000055567.18	Unc80	6174.77	-0.441363	0.160199	0.00251175	0.0227371	-1.35789	0
ENSMUSG00000009281.6	Rarres2	154.033	0.76341	0.324904	0.00252038	0.0227911	1.6975	0
ENSMUSG00000027210.20	Meis2	2551.82	-0.505857	0.191031	0.00252	0.0227911	-1.41997	0
ENSMUSG00000023191.9	P3h3	196.797	-0.567333	0.220872	0.00252231	0.0227965	-1.48178	0
ENSMUSG00000038521.17	C1s1	501.402	0.562964	0.218171	0.002533	0.0228811	1.4773	0
ENSMUSG00000034647.15	Ankrd12	2087.6	-0.740224	0.31313	0.00253589	0.0228951	-1.67044	0
ENSMUSG00000027204.13	Fbn1	583.817	0.837709	0.368801	0.00255555	0.0230605	1.78721	0
ENSMUSG00000022193.7	Psmb5	1660.22	0.622681	0.248975	0.00257781	0.0232368	1.53973	0
ENSMUSG00000027108.15	Ola1	988.038	0.428419	0.156372	0.00257691	0.0232368	1.34576	0
ENSMUSG00000031374.13	Zfp92	919.064	-0.576693	0.22623	0.00259442	0.023362	-1.49143	0
ENSMUSG00000063882.12	Uqcrh	1978.38	0.458074	0.169434	0.00259339	0.023362	1.37371	0
ENSMUSG00000054708.17	Ankrd24	849.482	-0.648613	0.263877	0.00259873	0.0233885	-1.56766	0
ENSMUSG00000003469.9	Phyhip	393.832	-0.609773	0.24311	0.00261033	0.0234806	-1.52602	0
ENSMUSG00000024642.17	Tle4	205.47	0.638697	0.25771	0.00261562	0.0235159	1.55692	0
ENSMUSG00000021552.7	Gkap1	526.961	0.444897	0.164066	0.00262433	0.0235695	1.36122	0
ENSMUSG00000044349.16	Snhg11	211.421	-0.853841	0.383289	0.00264175	0.0237011	-1.80731	0
ENSMUSG00000020100.15	Slc29a3	253.894	-0.670748	0.276051	0.00264454	0.0237138	-1.5919	0
ENSMUSG00000039156.19	Stim2	847.607	-0.437955	0.161509	0.00264983	0.0237487	-1.35468	0
ENSMUSG00000032224.15	Fam81a	297.431	-0.64122	0.260076	0.00265342	0.0237685	-1.55965	0
ENSMUSG00000024589.18	Nedd4l	1305.16	-0.502281	0.190637	0.00266325	0.0238441	-1.41645	0
ENSMUSG00000073838.10	Tufm	957.655	0.484341	0.182147	0.00266465	0.0238441	1.39895	0
ENSMUSG00000015980.14	Lrrc27	108.365	-0.669367	0.27561	0.00266608	0.0238445	-1.59038	0
ENSMUSG00000051790.15	Nlgn2	1411.16	-0.463067	0.17266	0.00266829	0.0238519	-1.37847	0
ENSMUSG00000041842.15	Fhdc1	1055.26	-0.571062	0.224571	0.00267111	0.0238534	-1.48562	0
ENSMUSG00000019558.14	Slc6a8	459.317	-0.591745	0.235415	0.00267457	0.0238582	-1.50707	0
ENSMUSG00000063049.4	Ing2	820.472	0.490415	0.185178	0.00267871	0.0238704	1.40485	0
ENSMUSG00000090112.8	Shprh	1004.59	-0.461717	0.172211	0.00267805	0.0238704	-1.37718	0
ENSMUSG00000018932.9	Map2k3	504.495	0.536623	0.207074	0.00268761	0.0239076	1.45057	0
ENSMUSG00000026126.15	Ptpn18	53.9029	0.971073	0.457291	0.00268848	0.0239076	1.9603	0
ENSMUSG00000027490.17	E2f1	346.419	-0.660704	0.271538	0.00268705	0.0239076	-1.58085	0
ENSMUSG00000069793.12	Slfn9	342.034	-0.909963	0.419656	0.00268577	0.0239076	-1.879	0
ENSMUSG00000018585.9	Atox1	549.717	0.601617	0.239813	0.00269283	0.0239339	1.51742	0
ENSMUSG00000027243.8	Harbi1	378.122	-0.599943	0.239537	0.00269756	0.0239636	-1.51566	0
ENSMUSG00000037617.12	Spag1	221.448	0.704844	0.295368	0.00270313	0.0239882	1.62997	0
ENSMUSG00000031021.13	Tmem9b	910.531	0.498012	0.189034	0.00271451	0.0240767	1.41227	0
ENSMUSG00000079523.8	Tmsb10	1123.81	-0.580218	0.229661	0.0027191	0.024105	-1.49507	0
ENSMUSG00000027860.15	Vangl1	216.858	0.621595	0.250434	0.0027268	0.0241482	1.53858	0
ENSMUSG00000074886.11	Grk6	773.848	0.451703	0.167885	0.00272655	0.0241482	1.36765	0
ENSMUSG00000026427.16	Eif2d	943.96	0.535701	0.207149	0.00273098	0.0241728	1.44965	0
ENSMUSG00000052713.9	Zfp608	927.578	-0.613253	0.246885	0.00273887	0.0242176	-1.5297	0
ENSMUSG00000022894.6	Adamts5	98.1312	0.941243	0.438228	0.00274645	0.0242471	1.92018	0
ENSMUSG00000040774.15	Cept1	512.292	0.531595	0.205214	0.00274529	0.0242471	1.44553	0
ENSMUSG00000039031.16	Arhgap18	481.508	0.502606	0.191489	0.00275592	0.0243182	1.41677	0
ENSMUSG00000040591.18	1110051M20Rik	630.284	0.528091	0.203936	0.00276811	0.0244007	1.44202	0
ENSMUSG00000041481.17	Serpina3g	7.37428	0.259763	0.511065	0.00276804	0.0244007	1.19728	0
ENSMUSG00000047649.9	Cd3eap	316.465	0.53604	0.207766	0.00277008	0.0244054	1.44999	0
ENSMUSG00000027858.13	Tspan2	1767.74	-0.58714	0.234084	0.00277418	0.0244165	-1.50227	0
ENSMUSG00000054423.14	Cadps	3799.44	-0.437564	0.162167	0.00277313	0.0244165	-1.35432	0
ENSMUSG00000025597.13	Klhl4	79.3153	0.780694	0.339517	0.00277745	0.0244327	1.71796	0
ENSMUSG00000068617.5	Efcab1	3535.77	-0.503086	0.192191	0.00278427	0.0244802	-1.41724	0
ENSMUSG00000031790.8	Mmp15	391.125	0.684037	0.285083	0.00279441	0.0245568	1.60663	0
ENSMUSG00000032673.5	Prorsd1	395.524	-0.536463	0.208881	0.00280659	0.0246511	-1.45041	0
ENSMUSG00000044646.15	Zbtb7c	251.889	-0.62279	0.253021	0.00282266	0.0247796	-1.53985	0
ENSMUSG00000041797.7	Abca9	98.8817	0.768433	0.333303	0.00282632	0.024799	1.70342	0
ENSMUSG00000038387.9	Rras	224.318	0.634572	0.259079	0.00282913	0.024811	1.55248	0
ENSMUSG00000037010.7	Apln	105.409	1.11202	0.559733	0.00285032	0.024984	2.16148	0
ENSMUSG00000033020.7	Polr2f	596.518	0.557743	0.219489	0.00286665	0.0251143	1.47197	0
ENSMUSG00000073678.4	Pgap1	2702.7	0.580812	0.23158	0.00287418	0.0251674	1.49569	0
ENSMUSG00000035873.8	Pawr	612.451	-0.538773	0.210521	0.00287626	0.0251728	-1.45274	0
ENSMUSG00000002280.11	Ciao3	718.737	0.490043	0.186778	0.00287829	0.0251777	1.40449	0
ENSMUSG00000048832.9	Vps37c	746.077	-0.553139	0.217988	0.00289131	0.0252787	-1.46727	0
ENSMUSG00000047146.17	Tet1	351.657	-0.696362	0.295495	0.00289353	0.0252852	-1.62041	0
ENSMUSG00000021388.14	Aspn	329.835	0.658007	0.272363	0.00289544	0.025289	1.5779	0
ENSMUSG00000006205.13	Htra1	121.157	0.920533	0.430264	0.00290065	0.0253216	1.89281	0
ENSMUSG00000030339.7	Ltbr	387.405	-0.580923	0.232098	0.00291102	0.0253992	-1.49581	0
ENSMUSG00000034762.9	Glis1	46.0121	1.08028	0.542357	0.00291253	0.0253994	2.11444	0
ENSMUSG00000063430.9	Wscd2	34.6709	-1.21493	0.638998	0.00294751	0.0256903	-2.3213	0
ENSMUSG00000024683.6	Mrpl16	414.254	0.513177	0.198426	0.00295083	0.0256943	1.42719	0
ENSMUSG00000074754.4	Smim26	305.455	0.639913	0.263985	0.00296603	0.0258135	1.55823	0
ENSMUSG00000067212.8	H2-T23	1133.87	0.506265	0.195244	0.00297064	0.0258405	1.42037	0
ENSMUSG00000020656.16	Grhl1	227.517	-0.783663	0.348254	0.00297526	0.0258675	-1.7215	0
ENSMUSG00000086040.8	Wipf3	49.6834	-0.935318	0.440934	0.00297727	0.0258719	-1.91231	0
ENSMUSG00000019362.8	D8Ertd738e	1279.43	0.446726	0.16757	0.00298324	0.0259106	1.36294	0
ENSMUSG00000038319.14	Kcnh2	1842.55	-0.402258	0.148109	0.00298864	0.0259445	-1.32157	0
ENSMUSG00000041324.14	Inhba	70.3232	-1.01133	0.496916	0.00299325	0.0259713	-2.01577	0
ENSMUSG00000029381.16	Shroom3	1350.08	-0.613149	0.250896	0.00300667	0.0260745	-1.52959	0
ENSMUSG00000001524.14	Gtf2h4	230.745	0.630554	0.259919	0.0030224	0.0261977	1.54816	0
ENSMUSG00000025572.17	Tmc6	296.954	-0.592984	0.239957	0.00303025	0.0262525	-1.50836	0
ENSMUSG00000072875.2	Gpr27	764.603	-0.51816	0.201921	0.0030346	0.0262769	-1.43213	0
ENSMUSG00000026956.15	Uap1l1	741.673	-0.594961	0.241315	0.00303794	0.0262793	-1.51043	0
ENSMUSG00000050234.7	Gja4	182.611	0.814802	0.367612	0.0030371	0.0262793	1.75906	0
ENSMUSG00000028798.16	Eif3i	1724.69	0.43613	0.163348	0.00307922	0.0266229	1.35297	0
ENSMUSG00000050856.16	Atp5k	888.697	0.513151	0.199659	0.00308496	0.0266462	1.42716	0
ENSMUSG00000054720.12	Lrrc8c	450.498	0.677373	0.286046	0.00308502	0.0266462	1.59923	0
ENSMUSG00000022763.18	Aifm3	49.2144	-0.975163	0.479019	0.00309591	0.0267268	-1.96586	0
ENSMUSG00000024556.4	Me2	531.929	0.556925	0.22167	0.00310399	0.0267773	1.47113	0
ENSMUSG00000111800.1	Gm31557	22.4563	-1.18212	0.62579	0.00310489	0.0267773	-2.2691	0
ENSMUSG00000037570.16	Mcrs1	895.461	0.599089	0.243848	0.00311325	0.0268332	1.51476	0
ENSMUSG00000021967.4	Mrpl57	559.945	0.638267	0.265223	0.00311951	0.0268629	1.55646	0
ENSMUSG00000044340.7	Phlpp1	631.589	0.538893	0.212629	0.00312182	0.0268692	1.45286	0
ENSMUSG00000102700.1	Gm38312	28.8118	-1.11473	0.574092	0.00312602	0.0268919	-2.16554	0
ENSMUSG00000002393.14	Nr2f6	569.735	0.435096	0.163318	0.00312936	0.0269072	1.352	0
ENSMUSG00000028121.8	Bcar3	97.1132	0.74651	0.32674	0.00313408	0.0269343	1.67773	0
ENSMUSG00000057193.8	Slc44a2	809.439	0.447803	0.169208	0.00314684	0.0270303	1.36396	0
ENSMUSG00000014177.10	Tvp23b	2579.3	-0.51085	0.199406	0.00315691	0.0271033	-1.42489	0
ENSMUSG00000063524.13	Eno1	4148.8	0.509264	0.197988	0.00319191	0.02739	1.42332	0
ENSMUSG00000055026.13	Gabrg3	44.9801	0.986686	0.483081	0.00320868	0.0275201	1.98163	0
ENSMUSG00000028223.8	Decr1	392.769	-0.493826	0.191688	0.00321878	0.027593	-1.40817	0
ENSMUSG00000116097.1	Gm36738	87.5938	-0.760506	0.339955	0.00323289	0.0277001	-1.69409	0
ENSMUSG00000038555.7	Reep2	363.428	-0.498887	0.194198	0.00323843	0.0277337	-1.41312	0
ENSMUSG00000020027.18	Socs2	993.856	-0.676562	0.289224	0.0032449	0.0277649	-1.59833	0
ENSMUSG00000059970.7	Hspa2	459.137	-0.719148	0.314039	0.00324531	0.0277649	-1.64621	0
ENSMUSG00000028447.11	Dctn3	1441.71	0.538733	0.213798	0.00324784	0.0277726	1.4527	0
ENSMUSG00000035376.10	Hacd2	530.395	0.50358	0.196509	0.00325004	0.0277776	1.41773	0
ENSMUSG00000021948.17	Prkcd	288.744	-0.626805	0.2612	0.00325397	0.0277974	-1.54414	0
ENSMUSG00000019929.16	Dcn	352.193	0.829459	0.382073	0.00326037	0.0278381	1.77702	0
ENSMUSG00000042286.13	Stab1	403.577	0.594356	0.243064	0.00327476	0.0279449	1.5098	0
ENSMUSG00000111368.1	Gm47889	38.8606	-1.00753	0.507774	0.00327613	0.0279449	-2.01046	0
ENSMUSG00000027076.10	Timm10	175.686	0.681108	0.291936	0.00327846	0.0279508	1.60337	0
ENSMUSG00000004837.2	Grap	63.576	0.89826	0.430469	0.00329177	0.0280504	1.86382	0
ENSMUSG00000062580.9	Timm17a	998.286	0.452848	0.17269	0.00330187	0.0281224	1.36874	0
ENSMUSG00000026073.13	Il1r2	138.446	0.95341	0.467696	0.00330566	0.0281408	1.93644	0
ENSMUSG00000047875.6	Gpr157	85.8767	-0.81017	0.371603	0.00330906	0.0281557	-1.75342	0
ENSMUSG00000039096.10	Rsad1	181.805	-0.695673	0.301811	0.00331669	0.0282067	-1.61964	0
ENSMUSG00000027030.15	Stk39	719.014	0.54831	0.219474	0.00333424	0.0283278	1.46237	0
ENSMUSG00000020964.14	Sel1l	2819.96	-0.512238	0.202237	0.00336383	0.0285651	-1.42626	0
ENSMUSG00000023868.17	Pde10a	621.74	0.80821	0.371348	0.00337156	0.0285955	1.75104	0
ENSMUSG00000050967.5	Creg2	168.928	0.745817	0.331205	0.00337242	0.0285955	1.67692	0
ENSMUSG00000021910.15	Nisch	12204.8	-0.40222	0.151176	0.00338205	0.0286496	-1.32154	0
ENSMUSG00000023945.7	Slc5a7	224.845	0.983894	0.489379	0.00338213	0.0286496	1.9778	0
ENSMUSG00000034684.12	Sema3f	574.708	0.680947	0.293261	0.00339226	0.0287211	1.60319	0
ENSMUSG00000005237.14	Dnah2	202.293	-0.754523	0.339819	0.00341454	0.0288702	-1.68707	0
ENSMUSG00000022557.11	Bop1	531.585	0.629152	0.263989	0.00341491	0.0288702	1.54666	0
ENSMUSG00000031079.12	Zfp300	30.8888	-1.00147	0.504539	0.00341271	0.0288702	-2.00204	0
ENSMUSG00000025207.16	Sema4g	76.4637	-0.805576	0.370558	0.0034183	0.0288846	-1.74784	0
ENSMUSG00000022766.14	Serpind1	23.3007	-1.24185	0.684719	0.00343546	0.029001	-2.36502	0
ENSMUSG00000038608.15	Dock10	1134.59	0.521284	0.207129	0.00346996	0.0292778	1.43523	0
ENSMUSG00000039886.8	Tmem120a	138.541	0.659411	0.28232	0.0034825	0.0293691	1.57944	0
ENSMUSG00000020736.12	Nt5c	311.592	0.706243	0.31044	0.00351068	0.0295632	1.63155	0
ENSMUSG00000060244.1	Alyref2	124.078	-0.727028	0.323194	0.00350933	0.0295632	-1.65523	0
ENSMUSG00000063229.15	Ldha	606.716	0.718046	0.317113	0.00350762	0.0295632	1.64495	0
ENSMUSG00000045659.18	Plekha7	359.555	-0.598756	0.249031	0.00351376	0.0295746	-1.51441	0
ENSMUSG00000025857.10	Dnaaf5	499.203	0.497577	0.195729	0.00352055	0.0296172	1.41184	0
ENSMUSG00000040543.16	Pitpnm3	1754.75	0.642094	0.272878	0.00353807	0.0297208	1.56059	0
ENSMUSG00000040631.8	Dok4	322.244	0.595414	0.24677	0.00353683	0.0297208	1.51091	0
ENSMUSG00000024885.9	Aldh3b1	140.727	-0.728135	0.325577	0.0035403	0.029725	-1.6565	0
ENSMUSG00000036564.17	Ndrg4	977.668	0.523804	0.20911	0.00356728	0.0299369	1.43774	0
ENSMUSG00000038058.14	Nod1	939.042	-0.455766	0.176189	0.00356982	0.0299435	-1.37151	0
ENSMUSG00000095687.2	Rnaset2a	602.797	0.502141	0.198662	0.00360421	0.0302172	1.41631	0
ENSMUSG00000028464.16	Tpm2	140.047	0.700218	0.307781	0.00361075	0.0302425	1.62475	0
ENSMUSG00000025421.15	Hdhd2	836.73	0.533434	0.214753	0.00362058	0.0302804	1.44737	0
ENSMUSG00000029134.14	Plb1	25.057	1.26309	0.763874	0.00361854	0.0302804	2.40009	0
ENSMUSG00000034853.16	Acot11	357.676	-0.71639	0.319493	0.00361998	0.0302804	-1.64307	0
ENSMUSG00000033998.9	Kcnk1	635.301	-0.446469	0.169526	0.00362732	0.030322	-1.3627	0
ENSMUSG00000045730.4	Adrb2	51.2303	-0.914571	0.449541	0.00363546	0.0303752	-1.88501	0
ENSMUSG00000026638.15	Irf6	1459.07	-0.531514	0.214633	0.00364634	0.0304513	-1.44545	0
ENSMUSG00000014426.9	Map3k4	994.579	-0.47111	0.184224	0.0036591	0.0305429	-1.38618	0
ENSMUSG00000059277.12	R74862	70.5566	-0.774064	0.357226	0.00367413	0.0306386	-1.71008	0
ENSMUSG00000003863.18	Ppfia3	189.571	-0.59705	0.249761	0.00368637	0.0307217	-1.51262	0
ENSMUSG00000005534.10	Insr	1378.2	-0.566165	0.23305	0.00368768	0.0307217	-1.48058	0
ENSMUSG00000020193.3	Zpbp	20.0759	-1.29959	0.751946	0.00369898	0.0308009	-2.46159	0
ENSMUSG00000024785.7	Rcl1	292.422	0.522744	0.209951	0.00370127	0.030805	1.43669	0
ENSMUSG00000009585.18	Apobec3	262.848	-0.601706	0.253175	0.00370735	0.0308406	-1.51751	0
ENSMUSG00000037610.15	Kcnmb2	2364.37	-0.623308	0.265068	0.00371271	0.0308702	-1.5404	0
ENSMUSG00000028188.13	Spata1	100.122	0.838767	0.403185	0.00372111	0.0309251	1.78852	0
ENSMUSG00000028199.18	Cryz	322.289	-0.623099	0.265084	0.00373937	0.0310618	-1.54018	0
ENSMUSG00000026343.6	Gpr39	101.468	-0.686338	0.302094	0.00375358	0.0311647	-1.60919	0
ENSMUSG00000045996.12	Polr2k	482.727	0.496592	0.197178	0.00376377	0.0312342	1.41088	0
ENSMUSG00000026568.6	Mpc2	918.109	0.520567	0.209467	0.0037789	0.0313446	1.43452	0
ENSMUSG00000044024.16	Rell2	61.1473	-0.831249	0.397542	0.00379595	0.0314708	-1.77923	0
ENSMUSG00000072825.11	Cep170b	2963.35	-0.418033	0.160903	0.00379832	0.0314752	-1.3361	0
ENSMUSG00000043411.15	Usp48	3068.2	-0.399947	0.151093	0.00380719	0.0315335	-1.31946	0
ENSMUSG00000031778.13	Cx3cl1	464.133	-0.516403	0.208105	0.00381983	0.0316229	-1.43038	0
ENSMUSG00000020692.14	Nle1	214.901	0.802734	0.378616	0.00382633	0.0316614	1.7444	0
ENSMUSG00000025036.7	Sfxn2	1288.79	-0.424931	0.163294	0.00384331	0.0317712	-1.34251	0
ENSMUSG00000052852.8	Reep1	227.152	0.794463	0.372163	0.0038419	0.0317712	1.73443	0
ENSMUSG00000022516.10	Nudt16l1	1086.61	0.472683	0.186017	0.00385832	0.0318646	1.38769	0
ENSMUSG00000011257.19	Pabpc4	1995.8	-0.440132	0.168208	0.00386391	0.0318954	-1.35673	0
ENSMUSG00000008036.11	Ap2s1	1311.44	0.499358	0.199481	0.00387798	0.0319962	1.41358	0
ENSMUSG00000022708.16	Zbtb20	3367.28	-0.544795	0.223487	0.00388297	0.0320065	-1.45881	0
ENSMUSG00000071657.12	Bscl2	680.149	-0.483064	0.191622	0.00388164	0.0320065	-1.39771	0
ENSMUSG00000069633.12	Pex11g	198.814	-0.688756	0.306946	0.00389097	0.0320571	-1.61189	0
ENSMUSG00000034040.16	Galnt17	37.821	1.06324	0.569308	0.00389439	0.0320671	2.08961	0
ENSMUSG00000040363.15	Bcor	1291.65	-0.421137	0.161954	0.00389593	0.0320671	-1.33898	0
ENSMUSG00000030157.5	Clec2d	233.387	0.784762	0.367534	0.00390158	0.0320981	1.72281	0
ENSMUSG00000030309.16	Caprin2	233.544	0.677487	0.299458	0.00390872	0.0321415	1.59935	0
ENSMUSG00000020743.15	Mif4gd	207.379	-0.643186	0.280618	0.00392155	0.0322315	-1.56177	0
ENSMUSG00000062203.15	Gspt1	2287.35	0.4676	0.183937	0.00393175	0.0322999	1.38281	0
ENSMUSG00000024388.11	Myo7b	22.1003	-1.23883	0.718143	0.00394635	0.0324043	-2.36008	0
ENSMUSG00000021235.13	Coq6	308.237	0.597009	0.252524	0.00395327	0.0324456	1.51258	0
ENSMUSG00000092564.2	BC051226	108.433	0.744788	0.342147	0.00395563	0.0324494	1.67573	0
ENSMUSG00000024082.5	Ndufaf7	502.048	0.468103	0.184706	0.00396166	0.0324678	1.38329	0
ENSMUSG00000097055.2	Gm4419	471.249	-0.596053	0.252472	0.00396132	0.0324678	-1.51158	0
ENSMUSG00000030677.8	Kif22	199.932	-0.596281	0.252377	0.0039667	0.0324936	-1.51181	0
ENSMUSG00000019124.10	Scrn1	2283.28	-0.400176	0.152739	0.00396874	0.0324948	-1.31967	0
ENSMUSG00000029059.9	Prxl2b	343.484	-0.501068	0.201557	0.00398416	0.0326054	-1.41526	0
ENSMUSG00000025265.14	Fgd1	270.242	-0.556847	0.230781	0.0039891	0.0326303	-1.47105	0
ENSMUSG00000015747.5	Vps45	475.853	0.557403	0.231131	0.00399344	0.0326502	1.47162	0
ENSMUSG00000036198.12	Arhgap36	303.233	0.585429	0.245977	0.00399622	0.0326574	1.50048	0
ENSMUSG00000041353.12	Tmem29	184.684	0.523725	0.212873	0.00400314	0.0326984	1.43766	0
ENSMUSG00000062252.9	Lhfpl5	98.4449	-0.653096	0.286124	0.00400775	0.0327204	-1.57254	0
ENSMUSG00000071662.4	Polr2g	1442.74	0.512928	0.207386	0.00401082	0.0327299	1.42694	0
ENSMUSG00000031536.6	Polb	655.045	0.426366	0.164836	0.00401608	0.0327572	1.34384	0
ENSMUSG00000022364.14	Tbc1d31	325.623	-0.618996	0.266858	0.00402463	0.0327958	-1.53581	0
ENSMUSG00000026939.12	Tmem141	109.997	-0.723848	0.331068	0.00402351	0.0327958	-1.65158	0
ENSMUSG00000056019.12	Zfp709	278.586	-0.57617	0.242241	0.00402671	0.0327971	-1.49089	0
ENSMUSG00000112276.1	5033421B08Rik	48.9528	-0.942734	0.485154	0.00403557	0.0328537	-1.92217	0
ENSMUSG00000030417.15	Pdcd5	452.34	0.460961	0.181546	0.00404792	0.0329103	1.37646	0
ENSMUSG00000034024.8	Cct2	4223.64	0.419031	0.161453	0.00404908	0.0329103	1.33703	0
ENSMUSG00000045392.8	Olfr1033	55.2982	-0.868534	0.428417	0.0040453	0.0329103	-1.82581	0
ENSMUSG00000061458.9	Nol10	276.46	0.644285	0.280365	0.0040502	0.0329103	1.56296	0
ENSMUSG00000033308.16	Dpyd	166.185	0.632009	0.273522	0.00405637	0.0329367	1.54972	0
ENSMUSG00000042254.14	Cilp	322.475	0.654642	0.286787	0.00405885	0.0329367	1.57422	0
ENSMUSG00000090247.7	Bloc1s1	235.526	0.54869	0.226905	0.00406881	0.0329989	1.46276	0
ENSMUSG00000038683.16	Pak1ip1	950.534	0.467623	0.185096	0.00409284	0.0331781	1.38283	0
ENSMUSG00000021993.10	Mipep	480.677	0.449883	0.17656	0.00410985	0.0333002	1.36593	0
ENSMUSG00000022389.15	Tef	3061.6	-0.625992	0.271885	0.00411603	0.0333346	-1.54327	0
ENSMUSG00000025409.14	Mbd6	1382.98	-0.426594	0.165784	0.00414972	0.0335614	-1.34406	0
ENSMUSG00000025938.16	Slco5a1	24.2243	1.2313	0.724585	0.00414802	0.0335614	2.34778	0
ENSMUSG00000038522.7	Mfsd4b1	81.7047	-0.78992	0.378357	0.00414991	0.0335614	-1.72898	0
ENSMUSG00000032898.9	Fbxo21	3058.01	-0.376408	0.142748	0.00415746	0.0336067	-1.29811	0
ENSMUSG00000028766.10	Alpl	50.1786	-0.887758	0.443645	0.00416165	0.0336229	-1.8503	0
ENSMUSG00000031637.13	Lrp2bp	127.086	0.686662	0.307978	0.00416339	0.0336229	1.60956	0
ENSMUSG00000025384.15	Faap100	474.558	0.503827	0.203988	0.00418126	0.0336879	1.41797	0
ENSMUSG00000045180.13	Shroom2	627.621	-0.534592	0.220384	0.00417568	0.0336879	-1.44853	0
ENSMUSG00000051998.14	Lax1	26.1069	1.18078	0.686086	0.0041797	0.0336879	2.26699	0
ENSMUSG00000072501.5	Phf20l1	2455.06	-0.426253	0.165948	0.00417903	0.0336879	-1.34374	0
ENSMUSG00000071234.3	Syndig1l	1068.11	-0.559123	0.234083	0.00419165	0.0337557	-1.47337	0
ENSMUSG00000098789.7	Jmjd7	91.533	0.737157	0.341713	0.00419375	0.0337568	1.66689	0
ENSMUSG00000050002.14	Idnk	465.11	0.513861	0.209468	0.00420356	0.0338198	1.42787	0
ENSMUSG00000045284.9	Dcaf12l1	913.559	-0.628895	0.274775	0.0042162	0.0338807	-1.54638	0
ENSMUSG00000066839.12	Ecsit	389.797	0.475453	0.189772	0.00421706	0.0338807	1.39035	0
ENSMUSG00000067787.10	Blcap	1137.48	-0.472989	0.189072	0.00421632	0.0338807	-1.38798	0
ENSMUSG00000067288.13	Rps28	1952.74	-0.384962	0.147158	0.00422165	0.0339017	-1.30583	0
ENSMUSG00000026163.17	Sphkap	13392.6	0.608628	0.261895	0.00424978	0.0340797	1.52481	0
ENSMUSG00000002741.9	Ykt6	1917.55	0.447719	0.176108	0.00425665	0.0341029	1.36388	0
ENSMUSG00000026222.16	Sp100	165.556	0.671578	0.300017	0.00425593	0.0341029	1.59281	0
ENSMUSG00000013367.5	Iglon5	36.2281	-1.09445	0.618581	0.00427674	0.0342479	-2.13532	0
ENSMUSG00000025239.3	Limd1	1954.39	-0.438127	0.17209	0.00428172	0.0342575	-1.35484	0
ENSMUSG00000035493.10	Tgfbi	143.028	0.762149	0.358364	0.00428194	0.0342575	1.69602	0
ENSMUSG00000033610.16	Pank1	460.306	0.541211	0.224518	0.00428838	0.034293	1.45519	0
ENSMUSG00000016028.10	Celsr1	137.466	-0.714195	0.328032	0.00429799	0.0343378	-1.64057	0
ENSMUSG00000034731.11	Dgkh	802.045	0.469532	0.187307	0.00429707	0.0343378	1.38466	0
ENSMUSG00000021796.15	Bmpr1a	2345.88	-0.494133	0.200381	0.00430404	0.0343702	-1.40847	0
ENSMUSG00000002981.10	Clptm1	2246.24	0.457883	0.181521	0.0043096	0.0343986	1.37353	0
ENSMUSG00000029765.12	Plxna4	91.8705	0.792614	0.379847	0.0043324	0.0345323	1.73221	0
ENSMUSG00000054641.10	Mmrn1	7.12015	0.167628	0.420751	0.00433124	0.0345323	1.12321	0
ENSMUSG00000030796.17	Tead2	66.2318	0.819089	0.398712	0.00434034	0.0345687	1.76429	0
ENSMUSG00000086386.1	Gm12108	7.43932	-0.409595	0.828474	0.004341	0.0345687	-1.32831	0
ENSMUSG00000027244.14	Atg13	1904.69	-0.407622	0.157883	0.0043442	0.0345781	-1.3265	0
ENSMUSG00000054027.8	Nt5dc3	1309.9	-0.47802	0.192396	0.00435229	0.0346265	-1.39283	0
ENSMUSG00000041782.14	Lad1	103.215	-0.904474	0.46528	0.00435511	0.0346328	-1.87186	0
ENSMUSG00000064966.1	Snord15b	7.76762	0.166578	0.419754	0.00436582	0.0346858	1.12239	0
ENSMUSG00000021958.5	Pinx1	81.967	0.843345	0.418166	0.00437852	0.0347267	1.7942	0
ENSMUSG00000029287.14	Tgfbr3	471.61	-0.584061	0.249633	0.00437907	0.0347267	-1.49906	0
ENSMUSG00000030763.7	Lcmt1	543.477	0.452561	0.179432	0.00437578	0.0347267	1.36847	0
ENSMUSG00000048833.9	Slc39a9	2258.36	-0.369193	0.140633	0.00437469	0.0347267	-1.29163	0
ENSMUSG00000031517.8	Gpm6a	96.4597	-0.747337	0.350517	0.00439066	0.0347712	-1.67869	0
ENSMUSG00000038489.8	Polr2l	555.168	0.598118	0.257161	0.00438843	0.0347712	1.51374	0
ENSMUSG00000044338.9	Aplnr	293.201	0.986771	0.530841	0.00439076	0.0347712	1.98175	0
ENSMUSG00000014444.17	Piezo1	276.653	0.735245	0.34354	0.00440813	0.0348765	1.66468	0
ENSMUSG00000019952.15	Poc1b	728.21	-0.428068	0.1683	0.00440698	0.0348765	-1.34543	0
ENSMUSG00000028622.11	Mrpl37	722.134	0.52879	0.219005	0.00441296	0.0348986	1.44272	0
ENSMUSG00000051557.15	Pusl1	161.674	0.664786	0.298742	0.00443162	0.0350157	1.58533	0
ENSMUSG00000058740.14	Kcnt1	36.9183	-1.22366	0.777587	0.00443185	0.0350157	-2.33539	0
ENSMUSG00000025613.13	Cct8	4141.69	0.444234	0.175661	0.00443737	0.035027	1.36059	0
ENSMUSG00000051950.10	B3glct	194.258	-0.609067	0.264199	0.00443595	0.035027	-1.52527	0
ENSMUSG00000004661.15	Arid3b	225.462	-0.642297	0.285693	0.00445134	0.035105	-1.56081	0
ENSMUSG00000060445.11	Sycp2	29.3226	1.16117	0.683988	0.00445058	0.035105	2.23639	0
ENSMUSG00000036940.15	Kdm1a	2723.76	-0.358904	0.136718	0.00445426	0.0351094	-1.28245	0
ENSMUSG00000103697.1	Gm38020	88.4966	-0.695812	0.319299	0.00445599	0.0351094	-1.6198	0
ENSMUSG00000020131.14	Pcsk4	303.546	-0.74405	0.352449	0.00446139	0.0351196	-1.67487	0
ENSMUSG00000034793.15	G6pc3	768.984	0.511237	0.209769	0.00446135	0.0351196	1.42527	0
ENSMUSG00000022619.5	Mapk8ip2	3231.43	-0.419641	0.164384	0.00446416	0.0351253	-1.3376	0
ENSMUSG00000087200.1	Lrp8os3	118.432	-0.666542	0.301331	0.00447301	0.0351788	-1.58726	0
ENSMUSG00000026181.13	Ppm1f	561.153	0.551562	0.232146	0.00447667	0.0351915	1.46567	0
ENSMUSG00000024366.8	Gfra3	172.817	-0.762949	0.364071	0.00448343	0.0352284	-1.69696	0
ENSMUSG00000040212.12	Emp3	68.5311	0.848411	0.422446	0.00448812	0.0352491	1.80052	0
ENSMUSG00000017781.17	Pitpna	1954.56	0.418042	0.163439	0.00449167	0.0352609	1.33611	0
ENSMUSG00000032854.12	Ugt8a	100.369	-0.808173	0.394973	0.00449859	0.035299	-1.75099	0
ENSMUSG00000011751.16	Sptbn4	2122.39	-0.505437	0.207749	0.00450426	0.0353274	-1.41955	0
ENSMUSG00000039747.11	Orai2	345.455	-0.486589	0.19779	0.00451524	0.0353973	-1.40113	0
ENSMUSG00000030256.11	Bhlhe41	1517.1	-0.657264	0.295981	0.00452983	0.0354792	-1.57709	0
ENSMUSG00000072774.10	Zfp951	127.156	-0.68783	0.315094	0.00452927	0.0354792	-1.61086	0
ENSMUSG00000008822.15	Acyp1	431.433	0.57918	0.248175	0.00453541	0.0355067	1.494	0
ENSMUSG00000022987.12	Zfp641	287.208	-0.534649	0.223958	0.00454042	0.0355296	-1.44859	0
ENSMUSG00000024048.15	Myl12a	1161.45	0.534034	0.222759	0.00454319	0.0355351	1.44797	0
ENSMUSG00000024597.11	Slc12a2	1038.51	0.646473	0.2881	0.0045502	0.0355737	1.56534	0
ENSMUSG00000029563.16	Foxp2	127.252	0.88129	0.451941	0.00455645	0.0356063	1.84202	0
ENSMUSG00000002102.15	Psmc3	1689.69	0.418865	0.164281	0.00456511	0.0356095	1.33688	0
ENSMUSG00000030685.5	Kctd13	872.392	0.425213	0.167271	0.00456646	0.0356095	1.34277	0
ENSMUSG00000040828.10	Catsperd	20.2062	-1.2086	0.728272	0.00456724	0.0356095	-2.31113	0
ENSMUSG00000042289.11	Hsd3b7	325.78	-0.54218	0.228084	0.00456571	0.0356095	-1.45617	0
ENSMUSG00000097000.2	Gm17435	91.2425	-1.02757	0.578912	0.00456135	0.0356095	-2.03858	0
ENSMUSG00000025289.15	Prdx4	987.87	0.449984	0.179374	0.00457725	0.0356714	1.36603	0
ENSMUSG00000022965.8	Ifngr2	329.144	0.537511	0.224999	0.00458526	0.0357175	1.45147	0
ENSMUSG00000019842.6	Traf3ip2	289.095	-0.645891	0.290012	0.00460245	0.0357864	-1.56471	0
ENSMUSG00000026918.16	Brd3	1234.81	-0.55405	0.234782	0.00459838	0.0357864	-1.4682	0
ENSMUSG00000028621.17	Cyb5rl	432.064	0.500401	0.205194	0.00460059	0.0357864	1.41461	0
ENSMUSG00000048154.17	Kmt2d	2374.45	-0.483318	0.196567	0.00460224	0.0357864	-1.39795	0
ENSMUSG00000015852.13	Fcrls	17.238	1.24943	0.781378	0.0046116	0.0358123	2.37748	0
ENSMUSG00000019689.4	Fmc1	232.94	0.72788	0.342052	0.00460788	0.0358123	1.6562	0
ENSMUSG00000029822.15	Osbpl3	856.073	0.487376	0.198584	0.00461265	0.0358123	1.40189	0
ENSMUSG00000068522.4	Aard	258.557	-0.545164	0.229971	0.00461414	0.0358123	-1.45919	0
ENSMUSG00000039349.5	C130074G19Rik	386.98	0.681412	0.310969	0.0046234	0.0358525	1.60371	0
ENSMUSG00000044164.2	Rnf182	271.689	-0.73808	0.350201	0.0046235	0.0358525	-1.66796	0
ENSMUSG00000004631.15	Sgce	391.077	-0.58339	0.251879	0.00463481	0.035924	-1.49837	0
ENSMUSG00000008373.16	Prpf31	581.044	0.515451	0.213572	0.00464399	0.0359788	1.42944	0
ENSMUSG00000095253.4	Zfp799	409.628	-0.484874	0.197789	0.00465499	0.0360478	-1.39946	0
ENSMUSG00000022111.9	Uchl3	310.644	0.568554	0.243296	0.0046641	0.0360857	1.48304	0
ENSMUSG00000060572.17	Mfap2	153.136	-0.604075	0.264279	0.00466347	0.0360857	-1.52	0
ENSMUSG00000023122.6	Sult1c2	171.766	-0.865701	0.444846	0.00466796	0.0360914	-1.82222	0
ENSMUSG00000047591.5	Mafa	8639.36	0.499867	0.205572	0.00466904	0.0360914	1.41408	0
ENSMUSG00000040195.11	Nemp1	175.832	-0.607167	0.266284	0.00469396	0.0362676	-1.52327	0
ENSMUSG00000087331.8	1810021B22Rik	58.0951	-0.922613	0.494932	0.00470174	0.0363114	-1.89555	0
ENSMUSG00000020022.17	Ndufa12	952.707	0.451976	0.181102	0.00470998	0.0363587	1.36791	0
ENSMUSG00000006546.3	Cryba2	554.068	-0.644756	0.290375	0.00472074	0.0363784	-1.56348	0
ENSMUSG00000017969.13	Ptgis	18.1295	1.2191	0.75287	0.00472315	0.0363784	2.32801	0
ENSMUSG00000021482.10	Prxl2c	1083.3	-0.467848	0.189406	0.00471867	0.0363784	-1.38305	0
ENSMUSG00000025889.13	Snca	170.945	0.639959	0.28606	0.00471896	0.0363784	1.55828	0
ENSMUSG00000027170.12	Eif3m	2572.56	0.434391	0.172393	0.00472155	0.0363784	1.35134	0
ENSMUSG00000038046.4	Mrm3	120.53	0.690947	0.318978	0.00473344	0.0364413	1.61434	0
ENSMUSG00000026687.14	Aldh9a1	1802.12	-0.407742	0.160048	0.00474155	0.0364874	-1.32661	0
ENSMUSG00000021488.8	Nsd1	3610.89	-0.422938	0.16759	0.00474595	0.0364885	-1.34065	0
ENSMUSG00000025140.15	Pycr1	337.457	-0.671498	0.307241	0.00474457	0.0364885	-1.59273	0
ENSMUSG00000051319.6	Mtln	387.747	0.468266	0.189681	0.00476112	0.0365887	1.38345	0
ENSMUSG00000028158.14	Mttp	401.921	-0.531255	0.223494	0.00480475	0.0368909	-1.44519	0
ENSMUSG00000053080.10	2700081O15Rik	731.583	-0.439155	0.176446	0.00480442	0.0368909	-1.35581	0
ENSMUSG00000070527.3	Mkrn3	21.8265	1.16426	0.699453	0.00480729	0.0368939	2.24118	0
ENSMUSG00000038690.15	Atp5j2	2403.12	0.498607	0.205788	0.00482375	0.0370037	1.41285	0
ENSMUSG00000023156.4	Rpp14	603.624	0.490087	0.201542	0.00483738	0.0370916	1.40453	0
ENSMUSG00000027774.16	Gfm1	732.021	0.438103	0.175213	0.00484257	0.0371148	1.35482	0
ENSMUSG00000031770.16	Herpud1	5417.04	-0.808863	0.399927	0.00484722	0.0371338	-1.75183	0
ENSMUSG00000029430.13	Ran	3360.58	0.496977	0.205135	0.00485195	0.0371372	1.41125	0
ENSMUSG00000057315.14	Arhgap24	853.116	-0.415602	0.164275	0.00485199	0.0371372	-1.33386	0
ENSMUSG00000026185.8	Igfbp5	475.402	-0.831361	0.422889	0.004863	0.0372049	-1.77936	0
ENSMUSG00000042549.10	Map2k3os	42.4105	0.846558	0.431955	0.00486751	0.0372228	1.79821	0
ENSMUSG00000034842.16	Art3	190.914	0.595367	0.26087	0.0048787	0.0372913	1.51086	0
ENSMUSG00000056069.10	Otulinl	286.112	-0.640516	0.290529	0.00488082	0.0372913	-1.55889	0
ENSMUSG00000023971.9	Rrp36	268.302	0.579666	0.251801	0.00488982	0.0373434	1.4945	0
ENSMUSG00000031093.14	Dock11	1754.21	-0.542225	0.231189	0.00489316	0.0373523	-1.45622	0
ENSMUSG00000006586.15	Runx1t1	955.89	-0.572534	0.248177	0.00491339	0.0374879	-1.48713	0
ENSMUSG00000048285.9	Frmd6	235.56	0.601443	0.264424	0.0049153	0.0374879	1.51723	0
ENSMUSG00000024044.19	Epb41l3	4401.27	-0.522452	0.220502	0.00491761	0.0374888	-1.43639	0
ENSMUSG00000020133.8	2310011J03Rik	579.835	0.518505	0.217198	0.00491983	0.0374891	1.43247	0
ENSMUSG00000027430.12	Dtd1	493.225	0.515362	0.21565	0.00493245	0.037567	1.42935	0
ENSMUSG00000059534.8	Uqcr10	1238.59	0.617976	0.275051	0.00493716	0.037567	1.53472	0
ENSMUSG00000087476.1	Rap1gapos	31.5491	-0.997687	0.565262	0.00493677	0.037567	-1.9968	0
ENSMUSG00000026678.10	Rgs5	6134	0.592464	0.260322	0.0049466	0.0375954	1.50782	0
ENSMUSG00000034485.10	Uaca	3362.09	-0.52888	0.224593	0.00494694	0.0375954	-1.44281	0
ENSMUSG00000047669.8	Msl3l2	364.695	-0.552317	0.236733	0.00495241	0.0376036	-1.46644	0
ENSMUSG00000050965.14	Prkca	1916.73	-0.521515	0.219815	0.00495195	0.0376036	-1.43546	0
ENSMUSG00000026980.15	Ly75	50.6536	-0.853791	0.440254	0.00496247	0.0376634	-1.80724	0
ENSMUSG00000028645.11	Slc2a1	283.292	0.585855	0.255715	0.00496631	0.0376758	1.50093	0
ENSMUSG00000058587.9	Tmod3	1088.1	0.411038	0.162407	0.00497444	0.0377209	1.32964	0
ENSMUSG00000041438.8	Utp4	681.325	0.441579	0.177462	0.00498089	0.037753	1.35809	0
ENSMUSG00000037321.17	Tap1	377.295	0.548749	0.234683	0.00498639	0.037778	1.46282	0
ENSMUSG00000051615.14	Rap2a	585.503	0.459602	0.186512	0.00498984	0.0377875	1.37516	0
ENSMUSG00000025736.15	Jmjd8	1387.66	-0.503174	0.209923	0.00500092	0.0378546	-1.41733	0
ENSMUSG00000017667.9	Zfp334	327.037	-0.544141	0.232482	0.00500449	0.0378649	-1.45815	0
ENSMUSG00000016346.17	Kcnq2	123.826	0.667788	0.306719	0.00501951	0.0379618	1.58863	0
ENSMUSG00000035390.16	Brsk1	404.698	-0.465628	0.190257	0.00503493	0.0380617	-1.38092	0
ENSMUSG00000066571.13	4931406P16Rik	1322.96	0.419203	0.166804	0.00505591	0.0382034	1.33719	0
ENSMUSG00000049791.4	Fzd4	713.23	0.531165	0.225139	0.00505959	0.0382144	1.4451	0
ENSMUSG00000018507.16	Trpv2	62.515	0.837029	0.429862	0.00507055	0.0382803	1.78637	0
ENSMUSG00000008855.17	Hdac5	4025.84	0.503987	0.210829	0.00508056	0.0383221	1.41813	0
ENSMUSG00000022427.4	Tomm22	1051.95	0.463667	0.189187	0.00507928	0.0383221	1.37904	0
ENSMUSG00000051486.5	Pcdhb11	43.5478	-0.924416	0.500205	0.00508849	0.0383651	-1.89792	0
ENSMUSG00000033096.7	Apmap	1324.57	0.395978	0.155758	0.00509572	0.0384001	1.31583	0
ENSMUSG00000000811.13	Txnrd3	157.241	0.695753	0.327438	0.00514778	0.0387269	1.61973	0
ENSMUSG00000031513.8	Leprotl1	1335.61	-0.420555	0.168106	0.00514394	0.0387269	-1.33844	0
ENSMUSG00000110481.1	Gm45705	23.3985	1.22392	0.786696	0.00514614	0.0387269	2.33581	0
ENSMUSG00000021716.14	Srek1ip1	449.289	-0.52387	0.222308	0.00518443	0.0389343	-1.43781	0
ENSMUSG00000028799.15	Zfp362	435.198	-0.575909	0.252174	0.00517851	0.0389343	-1.49062	0
ENSMUSG00000054582.4	Pabpc1l	48.757	-0.861214	0.455383	0.00518242	0.0389343	-1.81657	0
ENSMUSG00000074457.10	S100a16	209.92	0.628382	0.284252	0.00518059	0.0389343	1.54583	0
ENSMUSG00000074415.14	Mir100hg	123.416	-0.802412	0.407614	0.00519507	0.0389972	-1.74401	0
ENSMUSG00000022840.9	Adcy5	120.241	-0.71174	0.339707	0.00520284	0.0390043	-1.63778	0
ENSMUSG00000034667.8	Xpot	1722.49	-0.429395	0.172753	0.00520285	0.0390043	-1.34667	0
ENSMUSG00000037003.16	Tns2	1168.78	-0.587383	0.259846	0.00520138	0.0390043	-1.50252	0
ENSMUSG00000020160.18	Meis1	329.434	-0.499255	0.208953	0.00520923	0.0390351	-1.41348	0
ENSMUSG00000031748.16	Gnao1	11438.1	-0.409463	0.163515	0.00523189	0.0391878	-1.32819	0
ENSMUSG00000016255.5	Tubb1	32.5896	-1.10297	0.669682	0.00523917	0.0391909	-2.14796	0
ENSMUSG00000027285.13	Haus2	539.925	0.474335	0.195595	0.00523821	0.0391909	1.38928	0
ENSMUSG00000079084.10	Ccdc82	905.462	-0.492122	0.205441	0.00523725	0.0391909	-1.40651	0
ENSMUSG00000037706.17	Cd81	1826.4	-0.483482	0.201262	0.00525145	0.0392657	-1.39811	0
ENSMUSG00000047459.14	Dynlrb1	1739.43	0.450002	0.183132	0.00525825	0.0392993	1.36604	0
ENSMUSG00000016624.15	Phf21b	623.21	-0.585528	0.260517	0.00528079	0.0394288	-1.50059	0
ENSMUSG00000020483.14	Dynll2	7466.43	-0.440066	0.178421	0.00527802	0.0394288	-1.35667	0
ENSMUSG00000036446.5	Lum	217.812	0.757582	0.373219	0.00528247	0.0394288	1.69065	0
ENSMUSG00000035885.5	Cox8a	3417.46	0.514817	0.221342	0.00530866	0.039607	1.42881	0
ENSMUSG00000000740.12	Rpl13	7033.54	0.338841	0.129941	0.00532224	0.0396911	1.26474	0
ENSMUSG00000025226.11	Fbxl15	322.688	0.615867	0.278058	0.0053301	0.0397324	1.53248	0
ENSMUSG00000000738.18	Spg7	1516.64	0.453352	0.185366	0.00534264	0.0398086	1.36922	0
ENSMUSG00000023110.12	Prmt5	804.366	0.45302	0.185161	0.00536075	0.0399262	1.3689	0
ENSMUSG00000003531.15	Dgcr6	446.059	0.459066	0.188648	0.00540942	0.0402455	1.37465	0
ENSMUSG00000040688.16	Tbl3	617.728	0.502478	0.211876	0.00541128	0.0402455	1.41665	0
ENSMUSG00000046204.14	Pnma2	53.0648	-0.953233	0.543329	0.0054072	0.0402455	-1.93621	0
ENSMUSG00000096199.2	Ptrhd1	242.784	0.537584	0.231679	0.00541301	0.0402455	1.45154	0
ENSMUSG00000047583.9	Tyw3	65.8421	0.845668	0.448276	0.00543142	0.0403649	1.7971	0
ENSMUSG00000111343.1	Gm47175	18.134	1.24727	0.843438	0.0054465	0.0404594	2.37392	0
ENSMUSG00000002233.13	Rhoc	714.267	0.549867	0.240307	0.00545858	0.040514	1.46395	0
ENSMUSG00000042686.5	Jph1	43.5113	0.893925	0.483253	0.0054585	0.040514	1.85822	0
ENSMUSG00000055707.13	Klhl26	492.422	-0.437138	0.177946	0.00546364	0.040534	-1.35392	0
ENSMUSG00000032046.15	Abhd12	1221.96	0.450552	0.184516	0.00546957	0.0405429	1.36656	0
ENSMUSG00000035413.8	Tmem98	308.675	-0.509203	0.216381	0.00546949	0.0405429	-1.42326	0
ENSMUSG00000024309.15	Pfdn6	687.786	0.426758	0.172562	0.00547933	0.0405802	1.34421	0
ENSMUSG00000041046.7	Ramp3	240.591	0.706018	0.339523	0.00547729	0.0405802	1.6313	0
ENSMUSG00000031820.9	Babam1	1196.73	0.479755	0.199824	0.00549292	0.0406632	1.39451	0
ENSMUSG00000025171.2	Ubtd1	166.662	0.608602	0.274973	0.0054962	0.04067	1.52478	0
ENSMUSG00000040867.13	Begain	37.8448	1.16607	0.759388	0.0055024	0.0406983	2.24399	0
ENSMUSG00000027248.13	Pdia3	19055.9	-0.49751	0.207242	0.00552916	0.0408786	-1.41178	0
ENSMUSG00000005779.12	Psmb4	3171.91	0.397592	0.158455	0.00553555	0.0409082	1.31731	0
ENSMUSG00000033845.13	Mrpl15	517.394	0.563297	0.247706	0.00554514	0.0409614	1.47764	0
ENSMUSG00000038545.13	Cul7	1668.56	-0.49197	0.207447	0.00557414	0.0411579	-1.40636	0
ENSMUSG00000020775.13	Mrpl38	580.701	0.531065	0.229076	0.00558764	0.0411867	1.445	0
ENSMUSG00000025203.6	Scd2	3050.88	-0.674599	0.321028	0.00558364	0.0411867	-1.59615	0
ENSMUSG00000044167.6	Foxo1	1511.9	-0.468224	0.194709	0.0055865	0.0411867	-1.38341	0
ENSMUSG00000090175.1	Ugt1a9	47.1448	0.995738	0.583738	0.0055842	0.0411867	1.9941	0
ENSMUSG00000022337.7	Emc2	874.108	0.428625	0.174103	0.00561878	0.0413628	1.34595	0
ENSMUSG00000053550.13	Shisa7	21.5325	-1.31585	1.01645	0.00561803	0.0413628	-2.48948	0
ENSMUSG00000027359.16	Slc27a2	31.1362	-1.16263	0.781893	0.00563532	0.0414668	-2.23866	0
ENSMUSG00000007946.11	Phox2a	53.6704	1.06484	0.655898	0.00564164	0.0414955	2.09194	0
ENSMUSG00000079018.10	Ly6c1	713.567	0.508538	0.216875	0.00567545	0.0417202	1.42261	0
ENSMUSG00000090523.2	Gypc	31.5674	1.02097	0.604549	0.00567707	0.0417202	2.02928	0
ENSMUSG00000052085.7	Dock8	582.939	-0.481018	0.202167	0.00568715	0.041745	-1.39573	0
ENSMUSG00000068184.7	Ndufaf2	189.634	0.524983	0.22607	0.00568417	0.041745	1.43892	0
ENSMUSG00000019179.10	Mdh2	3319.91	0.45132	0.186996	0.00569933	0.0417983	1.36729	0
ENSMUSG00000045091.4	Aqp12	34.344	1.25914	0.89293	0.00569988	0.0417983	2.39353	0
ENSMUSG00000027603.15	Ggt7	433.614	-0.654436	0.308247	0.00570236	0.0417986	-1.574	0
ENSMUSG00000054894.6	Dmac2l	315.337	0.491491	0.207797	0.00570705	0.0418152	1.4059	0
ENSMUSG00000022474.15	Pmm1	299.938	0.475316	0.198907	0.00572442	0.0419245	1.39022	0
ENSMUSG00000038543.13	BC028528	92.4118	0.629316	0.290153	0.00572895	0.0419397	1.54683	0
ENSMUSG00000029066.12	Mrpl20	792.859	0.510348	0.218534	0.00576819	0.042209	1.42439	0
ENSMUSG00000007872.3	Id3	637.114	0.663638	0.313979	0.00577523	0.0422115	1.58407	0
ENSMUSG00000019779.15	Frk	609.446	-0.51005	0.218916	0.00577839	0.0422115	-1.4241	0
ENSMUSG00000028953.10	Abcf2	960.246	0.478097	0.200629	0.00577813	0.0422115	1.39291	0
ENSMUSG00000034940.15	Synrg	2646.27	-0.421218	0.171494	0.00577399	0.0422115	-1.33906	0
ENSMUSG00000052609.9	Plekhg3	2149.64	-0.360934	0.142334	0.00578189	0.0422191	-1.28426	0
ENSMUSG00000058704.9	Memo1	608.665	0.436722	0.179001	0.00578501	0.0422239	1.35353	0
ENSMUSG00000064210.7	Ano6	2070.23	-0.36368	0.14361	0.00579058	0.0422466	-1.2867	0
ENSMUSG00000071847.13	Apcdd1	190.67	0.613693	0.281086	0.00582137	0.0424532	1.53017	0
ENSMUSG00000032182.15	Yipf2	1535.96	-0.453138	0.188289	0.00583613	0.0425427	-1.36902	0
ENSMUSG00000025192.13	Entpd7	425.754	-0.444635	0.183843	0.00585211	0.042641	-1.36097	0
ENSMUSG00000024986.12	Hhex	290.174	-0.574344	0.256894	0.00586903	0.0427462	-1.489	0
ENSMUSG00000029269.11	Sult1b1	21.5263	1.19644	0.811257	0.00588611	0.0428361	2.29174	0
ENSMUSG00000038347.15	Tcte2	37.3838	-0.838644	0.449449	0.00589224	0.0428361	-1.78837	0
ENSMUSG00000038607.12	Gng10	636.712	0.416979	0.16957	0.00589387	0.0428361	1.33513	0
ENSMUSG00000039050.8	Osbpl2	1865.49	-0.441399	0.182261	0.00589018	0.0428361	-1.35792	0
ENSMUSG00000073616.10	Cops9	1190.17	0.534578	0.233247	0.00589201	0.0428361	1.44852	0
ENSMUSG00000036800.8	Fam135b	341.464	0.531979	0.231859	0.00589831	0.0428502	1.44591	0
ENSMUSG00000031146.6	Plp2	480.596	-0.439039	0.181165	0.00591064	0.042909	-1.3557	0
ENSMUSG00000055022.14	Cntn1	2263.96	0.626606	0.290514	0.00591141	0.042909	1.54393	0
ENSMUSG00000097823.2	Gm16701	67.761	0.699997	0.340491	0.00592221	0.0429693	1.6245	0
ENSMUSG00000026527.13	Rgs7	295.233	-0.540488	0.237756	0.0059305	0.0430112	-1.45446	0
ENSMUSG00000028990.13	Lzic	225.47	0.561742	0.250237	0.00595032	0.0431184	1.47605	0
ENSMUSG00000038717.8	Atp5l	4297.44	0.48854	0.207509	0.00594936	0.0431184	1.40302	0
ENSMUSG00000079508.8	Apoo	562.14	0.429315	0.176032	0.00595673	0.0431467	1.34659	0
ENSMUSG00000025968.16	Ndufs1	2380.15	0.398888	0.15819	0.00597649	0.0432532	1.31849	0
ENSMUSG00000029182.10	1700001C02Rik	23.4398	-0.984655	0.580532	0.00599059	0.0433289	-1.97884	0
ENSMUSG00000037531.8	Mrpl47	315.263	0.539175	0.236866	0.005992	0.0433289	1.45314	0
ENSMUSG00000033149.17	Phldb2	2036.63	-0.507519	0.2185	0.00599608	0.0433401	-1.4216	0
ENSMUSG00000025902.13	Sox17	118.304	0.835444	0.450164	0.00600019	0.0433515	1.78441	0
ENSMUSG00000001786.14	Fbxo7	550.205	-0.449547	0.187074	0.00600949	0.0434005	-1.36561	0
ENSMUSG00000037640.15	Zfp60	667.343	-0.418188	0.171932	0.00605113	0.0436643	-1.33625	0
ENSMUSG00000071037.6	Camkmt	326.494	0.458509	0.191803	0.00605361	0.0436643	1.37412	0
ENSMUSG00000113362.1	Gm40557	22.0531	-1.0768	0.679412	0.00605366	0.0436643	-2.10936	0
ENSMUSG00000024963.12	Dnajc4	429.823	0.569251	0.255586	0.006062	0.0437061	1.48375	0
ENSMUSG00000053519.17	Kcnip1	1463.63	0.425327	0.1746	0.00608626	0.0438625	1.34288	0
ENSMUSG00000063317.7	Usp31	1361.17	0.460638	0.192944	0.00609257	0.0438896	1.37615	0
ENSMUSG00000044117.12	Bmerb1	40.1987	0.954101	0.560746	0.00610212	0.0439399	1.93737	0
ENSMUSG00000034203.8	Chchd4	578.388	0.443047	0.183839	0.0061077	0.0439616	1.35947	0
ENSMUSG00000037395.15	Rcor3	884.051	-0.44777	0.186709	0.00611805	0.0440176	-1.36393	0
ENSMUSG00000031176.8	Dynlt3	2742.95	0.457502	0.191569	0.00613611	0.0441264	1.37316	0
ENSMUSG00000035245.12	Eogt	580.543	0.431477	0.177927	0.00613832	0.0441264	1.34861	0
ENSMUSG00000029869.7	Ephb6	146.372	0.591757	0.2704	0.00618428	0.0444253	1.50708	0
ENSMUSG00000045438.12	Cox19	433.779	0.531567	0.233711	0.00618508	0.0444253	1.4455	0
ENSMUSG00000042203.8	Tbc1d22b	1289.26	-0.449246	0.187587	0.00619391	0.0444701	-1.36533	0
ENSMUSG00000025868.6	Higd2a	731.254	0.546382	0.242476	0.00619835	0.0444833	1.46042	0
ENSMUSG00000031557.16	Plekha2	359.32	-0.681933	0.333673	0.00621341	0.0445645	-1.60429	0
ENSMUSG00000074781.5	Ube2n	1397.09	0.429522	0.177336	0.00621486	0.0445645	1.34679	0
ENSMUSG00000030543.10	Mesp2	26.9717	-0.949984	0.558653	0.00622561	0.044623	-1.93185	0
ENSMUSG00000010095.13	Slc3a2	3721.66	-0.456031	0.192012	0.00625438	0.0447985	-1.37176	0
ENSMUSG00000044317.7	Gpr4	107.242	0.674174	0.326379	0.00625533	0.0447985	1.59568	0
ENSMUSG00000031520.6	Vegfc	127.87	0.584891	0.266716	0.00627241	0.0449021	1.49993	0
ENSMUSG00000026814.16	Eng	1918.9	0.558237	0.250031	0.00627648	0.0449125	1.47247	0
ENSMUSG00000026888.14	Grb14	848.823	0.430446	0.178046	0.00628395	0.0449472	1.34765	0
ENSMUSG00000032459.9	Mrps22	253.884	0.513451	0.223647	0.00629973	0.0450412	1.42746	0
ENSMUSG00000061119.7	Prcp	161.647	0.556816	0.249688	0.00631326	0.0451181	1.47102	0
ENSMUSG00000097431.2	Gm26782	471.31	-0.478987	0.204417	0.00631574	0.0451181	-1.39376	0
ENSMUSG00000038718.15	Pbx3	781.18	-0.46813	0.198642	0.00633225	0.0452171	-1.38331	0
ENSMUSG00000026698.8	Pigc	490.86	-0.478095	0.204412	0.00634188	0.0452597	-1.3929	0
ENSMUSG00000085826.1	Gm15638	17.5281	1.10674	0.729727	0.00634349	0.0452597	2.15358	0
ENSMUSG00000021156.17	Zmynd11	3965.25	0.362305	0.144679	0.00635261	0.0453059	1.28548	0
ENSMUSG00000036395.15	Glb1l2	3342.14	0.451501	0.189169	0.00636331	0.0453634	1.36746	0
ENSMUSG00000097286.2	Gm26684	27.178	-1.08289	0.730278	0.00639513	0.0455713	-2.11828	0
ENSMUSG00000042249.11	Grk3	3638.14	-0.505547	0.221148	0.0064046	0.045617	-1.41966	0
ENSMUSG00000051359.15	Ncald	2195.46	0.42982	0.178265	0.00640687	0.045617	1.34707	0
ENSMUSG00000021371.5	Mcur1	1022.51	-0.422548	0.174607	0.00642343	0.0457159	-1.34029	0
ENSMUSG00000024907.7	Gal	22.708	1.2539	0.953191	0.0064421	0.0458108	2.38485	0
ENSMUSG00000028840.10	Zfp593	166.843	0.666146	0.324005	0.00645893	0.0458924	1.58683	0
ENSMUSG00000048731.15	Ggnbp1	60.8548	-0.782617	0.418184	0.0064579	0.0458924	-1.72025	0
ENSMUSG00000019897.8	Ccdc59	882.437	0.369722	0.148718	0.00650873	0.046208	1.2921	0
ENSMUSG00000026405.14	C4bp	17.2831	1.19852	0.945063	0.00651195	0.0462117	2.29504	0
ENSMUSG00000028519.16	Dab1	25.3761	1.1428	0.866322	0.00653609	0.046357	2.2081	0
ENSMUSG00000072568.4	Lratd2	711.657	-0.56336	0.256732	0.00653784	0.046357	-1.47771	0
ENSMUSG00000087371.1	Gm15541	19.2168	-1.12824	0.770141	0.00654347	0.0463778	-2.18591	0
ENSMUSG00000097828.2	6430562O15Rik	30.8493	-0.90959	0.526613	0.00655598	0.0464472	-1.87851	0
ENSMUSG00000032330.7	Cox7a2	2253.48	0.516706	0.229854	0.00656252	0.0464551	1.43068	0
ENSMUSG00000086119.2	Gm2415	309.885	0.506837	0.221489	0.00656012	0.0464551	1.42093	0
ENSMUSG00000036733.16	Rbm42	1082.31	0.43953	0.184038	0.00658073	0.0465562	1.35616	0
ENSMUSG00000062980.15	Cped1	90.1616	-0.840689	0.470648	0.00658223	0.0465562	-1.79091	0
ENSMUSG00000013415.9	Igf2bp1	7.95748	-0.280572	0.535951	0.00658745	0.046574	-1.21468	0
ENSMUSG00000014905.4	Dnajb9	4836.75	-0.555305	0.251938	0.0065949	0.0466074	-1.46948	0
ENSMUSG00000046916.9	Myct1	237.226	0.552111	0.248892	0.00663533	0.0468738	1.46623	0
ENSMUSG00000028073.15	Pear1	228.14	0.476332	0.204378	0.00665724	0.0470092	1.3912	0
ENSMUSG00000025825.12	Iscu	1253.42	0.388999	0.158101	0.00669352	0.0472459	1.30948	0
ENSMUSG00000028070.7	Naxe	1272.47	0.455727	0.194113	0.00672259	0.0474195	1.37147	0
ENSMUSG00000053841.15	Txlna	2534.84	-0.408309	0.169104	0.00672363	0.0474195	-1.32713	0
ENSMUSG00000046718.8	Bst2	217.227	0.657886	0.321387	0.00673884	0.0475072	1.57777	0
ENSMUSG00000032370.8	Lactb	227.714	0.608414	0.28697	0.00681963	0.0480569	1.52458	0
ENSMUSG00000079111.3	Kdelr2	2388.13	-0.460486	0.196884	0.00682905	0.0481035	-1.37601	0
ENSMUSG00000034275.18	Igsf9b	1221.87	0.541189	0.243577	0.00684202	0.0481752	1.45517	0
ENSMUSG00000068876.15	Cgn	1650.03	0.509419	0.224682	0.0068628	0.0483016	1.42348	0
ENSMUSG00000020476.14	Dbnl	1368.07	0.432416	0.181712	0.00687137	0.0483421	1.34949	0
ENSMUSG00000021986.9	Amer2	556.125	-0.542923	0.245518	0.00687439	0.0483435	-1.45692	0
ENSMUSG00000026096.14	Osgepl1	239.302	0.501608	0.220323	0.00688067	0.0483678	1.41579	0
ENSMUSG00000114985.1	1810028F09Rik	143.794	1.07211	0.744207	0.0068909	0.0484199	2.10251	0
ENSMUSG00000019837.8	Gtf3c6	424.631	0.455924	0.194312	0.00689976	0.0484438	1.37166	0
ENSMUSG00000019979.12	Apaf1	361.39	0.482892	0.20955	0.006901	0.0484438	1.39754	0
ENSMUSG00000112627.1	4933412E12Rik	59.1346	-0.744123	0.389256	0.00690278	0.0484438	-1.67496	0
ENSMUSG00000020834.17	Dhrs13	120.101	0.558725	0.255307	0.00691707	0.0485242	1.47297	0
ENSMUSG00000022490.7	Ppp1r1a	5860.19	0.46187	0.197664	0.00693389	0.0486223	1.37733	0
ENSMUSG00000042284.10	Itga1	733.796	0.529531	0.237096	0.00694497	0.0486801	1.44346	0
ENSMUSG00000018238.6	Gdf9	9.04794	1.40919	1.43128	0.00698326	0.0489285	2.65588	0
ENSMUSG00000048878.6	Hexim1	1518.65	-0.426376	0.178833	0.00699098	0.0489625	-1.34385	0
ENSMUSG00000038010.9	Ccdc138	106.592	-0.660976	0.327322	0.00704158	0.0492767	-1.58115	0
ENSMUSG00000046826.7	Fam187b	247.566	-0.608355	0.290312	0.00703905	0.0492767	-1.52452	0
ENSMUSG00000016308.12	Ube2a	583.248	0.501823	0.221506	0.00706112	0.0493259	1.416	0
ENSMUSG00000020457.13	Drg1	1716.08	0.381582	0.154945	0.00706138	0.0493259	1.30277	0
ENSMUSG00000022048.8	Dpysl2	779.297	-0.437691	0.185588	0.00705939	0.0493259	-1.35443	0
ENSMUSG00000024114.15	Prss41	28.1811	-1.04847	0.716072	0.007063	0.0493259	-2.06834	0
ENSMUSG00000035109.14	Shc4	123.556	0.647216	0.316487	0.0070629	0.0493259	1.56614	0
ENSMUSG00000030301.17	Ccdc91	1135.35	-0.471368	0.204236	0.00706935	0.0493501	-1.38642	0
ENSMUSG00000032968.4	Inha	487.926	-0.609794	0.291829	0.00708151	0.0493747	-1.52604	0
ENSMUSG00000041144.11	Dnah7b	59.5598	-0.874233	0.520781	0.00707799	0.0493747	-1.83303	0
ENSMUSG00000068240.5	Gm11808	4751.41	0.404501	0.166618	0.00708086	0.0493747	1.32363	0
ENSMUSG00000032017.14	Grik4	28.668	-0.911673	0.550203	0.00710814	0.0495402	-1.88123	0
ENSMUSG00000022150.16	Dab2	261.021	0.811067	0.45309	0.00711427	0.0495629	1.75451	0
ENSMUSG00000023079.14	Gtf2ird1	564.284	-0.400679	0.167518	0.00712631	0.0496266	-1.32013	0
ENSMUSG00000021040.15	Slirp	467.315	0.482223	0.210476	0.00714009	0.0497023	1.39689	0
ENSMUSG00000037813.13	D630003M21Rik	56.7295	-0.766181	0.413887	0.00714778	0.0497357	-1.70076	0
ENSMUSG00000021036.10	Sptlc2	1035.92	0.406073	0.168959	0.00715892	0.049793	1.32507	0
ENSMUSG00000035878.13	Hykk	70.8933	-0.784733	0.429523	0.00716285	0.0498001	-1.72277	0
ENSMUSG00000027525.18	Phactr3	362.485	0.691026	0.351127	0.00717848	0.0498649	1.61443	0
ENSMUSG00000028194.15	Ddah1	38.1611	0.930638	0.571694	0.0071838	0.0498649	1.90612	0
ENSMUSG00000028760.16	Eif4g3	4290.79	0.383502	0.158342	0.00717933	0.0498649	1.3045	0
ENSMUSG00000078765.11	U2af1l4	532.191	0.426296	0.179775	0.00718143	0.0498649	1.34378	0
ENSMUSG00000019899.17	Lama2	437.274	0.6488	0.319283	0.00720234	0.0499733	1.56786	0
ENSMUSG00000028127.10	Abcd3	4580.86	-0.428694	0.181521	0.0072111	0.0500139	-1.34601	0
ENSMUSG00000005667.8	Mthfd2	902.935	-0.452767	0.194515	0.00722043	0.0500583	-1.36866	0
ENSMUSG00000030922.12	Lyrm1	91.9586	0.630529	0.306909	0.00725014	0.0502237	1.54813	0
ENSMUSG00000034177.15	Rnf43	35.4682	-0.988911	0.656139	0.00727738	0.0503733	-1.98469	0
ENSMUSG00000090236.3	Car15	1979.32	0.600401	0.285588	0.00727761	0.0503733	1.51614	0
ENSMUSG00000031231.4	Cox7b	1595.56	0.468726	0.2035	0.00730573	0.0505475	1.38389	0
ENSMUSG00000035875.15	AI182371	35.9106	-0.848361	0.495973	0.0073096	0.0505539	-1.80045	0
ENSMUSG00000015837.15	Sqstm1	7185.27	-0.545126	0.249288	0.00731347	0.0505603	-1.45915	0
ENSMUSG00000052105.17	Mtcl1	2224	-0.482064	0.212177	0.00736468	0.0508769	-1.39674	0
ENSMUSG00000052384.14	Nrros	124.246	0.699523	0.360585	0.00736521	0.0508769	1.62397	0
ENSMUSG00000021140.9	Pcnx	2946.25	-0.409643	0.172224	0.00741329	0.0511274	-1.32836	0
ENSMUSG00000027962.14	Vcam1	69.7478	0.878648	0.52341	0.0074134	0.0511274	1.83865	0
ENSMUSG00000039210.16	Gpatch2	780.544	-0.428003	0.181839	0.00740871	0.0511274	-1.34537	0
ENSMUSG00000045136.6	Tubb2b	321.16	0.740814	0.394677	0.00741294	0.0511274	1.67112	0
ENSMUSG00000028555.15	Ttc39a	1324.55	-0.434641	0.185456	0.00742848	0.0512108	-1.35157	0
ENSMUSG00000041141.7	Pnmal1	2268.4	-0.426467	0.181557	0.00751911	0.0518147	-1.34394	0
ENSMUSG00000030921.17	Trim30a	153.668	0.538965	0.246673	0.00753246	0.0518859	1.45293	0
ENSMUSG00000065145.1	Vaultrc5	15.526	0.328946	0.609269	0.00753813	0.0519041	1.2561	0
ENSMUSG00000056267.14	Cep70	969.32	-0.410979	0.173511	0.00757561	0.0521413	-1.32959	0
ENSMUSG00000027709.9	Mccc1	666.556	0.411088	0.173348	0.00758664	0.0521962	1.32969	0
ENSMUSG00000074922.1	Fam122a	613.241	-0.414613	0.175533	0.00759191	0.0522115	-1.33294	0
ENSMUSG00000032525.15	Nktr	5937.91	-0.521597	0.237251	0.00760878	0.0523065	-1.43554	0
ENSMUSG00000024427.7	Spry4	501.523	0.695562	0.359852	0.00761914	0.0523554	1.61951	0
ENSMUSG00000038151.13	Prdm1	264.757	0.5067	0.227748	0.007622	0.0523554	1.4208	0
ENSMUSG00000072889.9	Nfxl1	1038.98	-0.443962	0.191792	0.00766427	0.0526247	-1.36033	0
ENSMUSG00000022358.7	Fbxo32	743.382	-0.744397	0.404856	0.00766943	0.052639	-1.67527	0
ENSMUSG00000054252.18	Fgfr3	120.849	0.602961	0.291251	0.00767775	0.0526751	1.51883	0
ENSMUSG00000034551.12	Hdx	44.9728	-0.770716	0.425108	0.00770259	0.0528244	-1.70612	0
ENSMUSG00000029545.13	Acads	326.5	-0.448459	0.194272	0.00771242	0.0528706	-1.36458	0
ENSMUSG00000054893.15	Zfp667	773.376	-0.549935	0.256986	0.00771622	0.0528755	-1.46402	0
ENSMUSG00000055240.17	Zfp101	182.99	-0.558433	0.261793	0.00772205	0.0528944	-1.47267	0
ENSMUSG00000066306.13	Numa1	4891.37	-0.397021	0.16679	0.00772959	0.0529248	-1.31679	0
ENSMUSG00000029246.14	Ppat	2574.08	0.532981	0.245106	0.00774438	0.053005	1.44692	0
ENSMUSG00000032026.7	Rexo2	1153.39	0.54132	0.251253	0.00775211	0.0530367	1.4553	0
ENSMUSG00000076432.13	Ywhaq	12483.4	0.352817	0.142625	0.00775566	0.0530398	1.27705	0
ENSMUSG00000042097.17	Zfp239	39.695	-0.837382	0.494182	0.00775969	0.0530462	-1.78681	0
ENSMUSG00000021494.9	Ddx41	1973.06	0.401565	0.169341	0.00778038	0.0531665	1.32094	0
ENSMUSG00000027902.8	Chil6	19.5332	-1.08081	0.816418	0.00779211	0.0532254	-2.11522	0
ENSMUSG00000028741.13	Mrto4	334.702	0.490283	0.218768	0.00780179	0.0532703	1.40472	0
ENSMUSG00000041028.16	Ghitm	4199.46	0.409758	0.172611	0.00780655	0.0532815	1.32846	0
ENSMUSG00000014294.4	Ndufa2	1365.25	0.465055	0.203903	0.00781956	0.0533492	1.38037	0
ENSMUSG00000057637.13	Prdm2	1789.31	-0.340949	0.140231	0.00782324	0.053353	-1.26659	0
ENSMUSG00000023236.7	Scg5	21055	0.360615	0.147839	0.00784226	0.0534614	1.28397	0
ENSMUSG00000043924.16	Ncmap	49.0831	-0.751276	0.412762	0.00786495	0.0535914	-1.68328	0
ENSMUSG00000084934.1	Gm16035	38.7159	-0.893002	0.561842	0.00786758	0.0535914	-1.85704	0
ENSMUSG00000052456.9	Asna1	1627.27	0.574197	0.272395	0.00787261	0.0536044	1.48885	0
ENSMUSG00000060519.11	Tor3a	1124.92	-0.475337	0.210648	0.00787769	0.0536177	-1.39024	0
ENSMUSG00000043432.7	Leng9	215.973	-0.69875	0.367906	0.00790643	0.053792	-1.6231	0
ENSMUSG00000059278.9	Naa38	565.084	0.604986	0.294544	0.0079173	0.0538315	1.52096	0
ENSMUSG00000078652.9	Psme3	1484.47	0.38271	0.159738	0.00791852	0.0538315	1.30379	0
ENSMUSG00000042439.13	Zfp532	413.593	-0.445798	0.19385	0.00793419	0.0539166	-1.36207	0
ENSMUSG00000029390.13	Tmed2	6966.67	-0.399506	0.168603	0.00793755	0.0539181	-1.31906	0
ENSMUSG00000052563.13	D930048N14Rik	22.1165	-0.960454	0.629031	0.00795281	0.0540004	-1.94592	0
ENSMUSG00000020232.17	Hmg20b	622.206	0.525195	0.240997	0.00796046	0.0540309	1.43913	0
ENSMUSG00000114255.1	Gm10734	11.6903	-1.3049	1.30465	0.00799134	0.054219	-2.47066	0
ENSMUSG00000025314.16	Ptprj	986.484	-0.435708	0.188528	0.00799529	0.0542211	-1.35257	0
ENSMUSG00000055675.6	Kbtbd11	44.8349	-0.978716	0.668681	0.00799797	0.0542211	-1.97071	0
ENSMUSG00000021375.11	Kif13a	719.441	0.47026	0.207921	0.008012	0.0542519	1.38536	0
ENSMUSG00000029086.15	Prom1	1948.05	-0.444537	0.192519	0.00800999	0.0542519	-1.36088	0
ENSMUSG00000050017.11	Pitpnb	2140.4	-0.397567	0.167872	0.00801032	0.0542519	-1.31728	0
ENSMUSG00000024617.16	Camk2a	15.3015	1.11402	0.995161	0.00804378	0.0544456	2.16449	0
ENSMUSG00000015599.9	Ttbk1	64.2896	-0.785669	0.448559	0.00805703	0.0544922	-1.72389	0
ENSMUSG00000022263.10	Trio	2295.5	-0.417519	0.17865	0.00805678	0.0544922	-1.33563	0
ENSMUSG00000026259.14	Ngef	57.6032	-0.78396	0.443374	0.00806869	0.0545496	-1.72185	0
ENSMUSG00000032741.9	Tpcn1	1176.42	-0.371276	0.155382	0.00807366	0.0545616	-1.2935	0
ENSMUSG00000056995.3	Olfr1178	41.2965	-0.0857256	0.377088	0.00808042	0.0545858	-1.06122	0
ENSMUSG00000037553.14	Zdhhc18	458.689	0.527024	0.242832	0.00808584	0.0546009	1.44095	0
ENSMUSG00000036356.15	Csgalnact1	91.9164	0.770292	0.43438	0.0080947	0.0546177	1.70562	0
ENSMUSG00000049281.16	Scn3b	353.534	0.463401	0.204232	0.00809193	0.0546177	1.37879	0
ENSMUSG00000044220.13	Nkx2-3	100.845	0.699403	0.369012	0.00810538	0.0546683	1.62383	0
ENSMUSG00000007837.11	Prrg2	535.803	-0.472182	0.209998	0.00812508	0.0547796	-1.38721	0
ENSMUSG00000004951.10	Hspb1	311.7	0.694293	0.365772	0.00813764	0.0548427	1.61809	0
ENSMUSG00000025158.7	Rfng	456.4	0.492872	0.22211	0.00818037	0.0550676	1.40724	0
ENSMUSG00000030125.11	Lrrc23	34.611	-1.08427	0.973705	0.00817938	0.0550676	-2.12031	0
ENSMUSG00000032064.17	Dixdc1	649.492	-0.665012	0.344164	0.00818065	0.0550676	-1.58558	0
ENSMUSG00000049521.2	Cdc42ep1	262.358	0.608883	0.299287	0.00818459	0.0550725	1.52508	0
ENSMUSG00000051721.6	Wdcp	340.21	0.494251	0.222871	0.00819208	0.0551013	1.40859	0
ENSMUSG00000001794.13	Capns1	3614.12	0.417978	0.178595	0.00821356	0.0552241	1.33605	0
ENSMUSG00000039967.14	Zfp292	1551.06	-0.500413	0.22754	0.00822695	0.0552925	-1.41462	0
ENSMUSG00000022146.12	Osmr	213.744	0.745562	0.412918	0.00826946	0.0555496	1.67663	0
ENSMUSG00000109792.1	Gm45426	11.9284	-1.21129	1.13189	0.00827169	0.0555496	-2.31545	0
ENSMUSG00000005983.15	1700037C18Rik	171.648	0.580535	0.280668	0.00829286	0.0556571	1.4954	0
ENSMUSG00000063450.14	Syne2	1746.36	-0.460615	0.204018	0.00829419	0.0556571	-1.37613	0
ENSMUSG00000054612.4	Mgmt	60.4104	-0.684055	0.359151	0.00829977	0.0556727	-1.60665	0
ENSMUSG00000022026.7	Olfm4	823.174	-0.441078	0.192984	0.0083326	0.0558711	-1.35762	0
ENSMUSG00000038872.10	Zfhx3	481.218	-0.497896	0.226858	0.0084075	0.0563513	-1.41215	0
ENSMUSG00000022090.10	Pdlim2	30.4735	0.858588	0.527809	0.00843036	0.0564824	1.81326	0
ENSMUSG00000103037.1	Pcdhgb1	155.274	-0.626582	0.315278	0.00847271	0.056744	-1.5439	0
ENSMUSG00000096917.2	2500002B13Rik	49.4383	0.883518	0.5781	0.00849455	0.0568681	1.84487	0
ENSMUSG00000021773.11	Comtd1	80.4036	0.628631	0.317636	0.00851929	0.0570114	1.5461	0
ENSMUSG00000027074.14	Slc43a3	785.611	0.557364	0.265739	0.00853129	0.0570515	1.47158	0
ENSMUSG00000110649.1	Gm40466	25.3031	-0.882634	0.556604	0.00853194	0.0570515	-1.84374	0
ENSMUSG00000052581.13	Lrrtm4	37.6801	-0.816294	0.478038	0.00853819	0.0570711	-1.76088	0
ENSMUSG00000027800.14	Tm4sf1	940.724	0.525449	0.245634	0.00855411	0.0571106	1.43938	0
ENSMUSG00000027966.20	Col11a1	23.2119	1.02992	0.771336	0.00855273	0.0571106	2.04191	0
ENSMUSG00000038141.11	Tmem181a	1444.4	-0.464295	0.207291	0.00854974	0.0571106	-1.37964	0
ENSMUSG00000028937.14	Acot7	202.238	0.768997	0.439659	0.00856478	0.0571597	1.70408	0
ENSMUSG00000022354.4	Ndufb9	1917.95	0.403692	0.172572	0.00857908	0.0572328	1.32289	0
ENSMUSG00000062510.12	Nsl1	74.223	-0.808038	0.487127	0.00860959	0.057414	-1.75083	0
ENSMUSG00000015134.15	Aldh1a3	59.7331	0.877903	0.558725	0.00861511	0.0574239	1.8377	0
ENSMUSG00000020521.7	Rnft1	493.897	0.461455	0.205555	0.00862045	0.0574239	1.37693	0
ENSMUSG00000053329.7	Gatd3a	743.837	0.385846	0.163647	0.00862112	0.0574239	1.30663	0
ENSMUSG00000002731.6	Prkra	427.424	0.406939	0.174862	0.00863584	0.0574773	1.32587	0
ENSMUSG00000097601.2	Gm26660	38.2395	-0.767237	0.438416	0.00863322	0.0574773	-1.70201	0
ENSMUSG00000029074.14	Ttll10	83.9842	-0.747481	0.423568	0.00866287	0.0576348	-1.67886	0
ENSMUSG00000021579.4	Lrrc14b	26.0119	1.11689	1.00902	0.00867303	0.05768	2.16879	0
ENSMUSG00000049493.13	Pls1	330.906	-0.52606	0.246144	0.00869334	0.0577703	-1.43999	0
ENSMUSG00000075033.4	Nxpe3	50.2839	0.728157	0.402146	0.00869333	0.0577703	1.65652	0
ENSMUSG00000041977.18	Arhgef11	1977.14	-0.369128	0.155617	0.00869913	0.0577863	-1.29157	0
ENSMUSG00000046909.9	Tefm	220.602	0.534392	0.251662	0.00871599	0.0578759	1.44833	0
ENSMUSG00000004891.16	Nes	635.248	0.683235	0.364405	0.00874595	0.0579626	1.60574	0
ENSMUSG00000007721.6	Ccdc124	790.757	0.418704	0.1816	0.0087405	0.0579626	1.33673	0
ENSMUSG00000020605.9	Hs1bp3	404.556	-0.493616	0.225932	0.00873524	0.0579626	-1.40797	0
ENSMUSG00000023094.14	Msrb2	360.967	0.479749	0.217031	0.00874308	0.0579626	1.3945	0
ENSMUSG00000031486.15	Adgra2	220.369	0.627591	0.318179	0.00874345	0.0579626	1.54498	0
ENSMUSG00000074211.4	Sdhaf1	337.972	0.599417	0.297566	0.00875849	0.0580233	1.5151	0
ENSMUSG00000040209.12	Zfp704	1896.2	-0.433957	0.190509	0.00877068	0.0580592	-1.35093	0
ENSMUSG00000061353.11	Cxcl12	353.744	0.70132	0.379576	0.00876858	0.0580592	1.62599	0
ENSMUSG00000019832.5	Rab32	24.6565	0.951811	0.6596	0.00877989	0.0580977	1.9343	0
ENSMUSG00000045294.11	Insig1	3185.03	-0.679807	0.363814	0.00879135	0.0581511	-1.60193	0
ENSMUSG00000021061.15	Sptb	505.96	0.472539	0.212697	0.00880175	0.0581975	1.38755	0
ENSMUSG00000025495.15	Ptdss2	366.497	0.586465	0.288813	0.00883695	0.0584077	1.50156	0
ENSMUSG00000036553.16	Sh3tc1	105.462	0.658701	0.347214	0.00885692	0.0585171	1.57866	0
ENSMUSG00000060639.5	H4c9	309.654	0.574694	0.280238	0.00886652	0.0585579	1.48936	0
ENSMUSG00000062210.13	Tnfaip8	401.272	0.53859	0.255221	0.0089064	0.0587987	1.45255	0
ENSMUSG00000059654.7	Reg1	4454.57	1.09777	1.0503	0.00891272	0.0588178	2.14024	0
ENSMUSG00000031848.15	Lsm4	905.03	0.476825	0.216073	0.00893184	0.0589213	1.39168	0
ENSMUSG00000026879.14	Gsn	2021.65	0.459013	0.20536	0.00895433	0.0590469	1.3746	0
ENSMUSG00000074240.5	Cib3	318.798	-0.507455	0.235976	0.00896107	0.0590686	-1.42154	0
ENSMUSG00000021763.17	BC067074	69.1624	-0.66879	0.353818	0.00896501	0.0590719	-1.58974	0
ENSMUSG00000028140.13	Mrpl9	856.317	0.399382	0.171944	0.00898459	0.0591782	1.31894	0
ENSMUSG00000033157.17	Abhd10	480.28	0.399927	0.172307	0.00899224	0.0592058	1.31944	0
ENSMUSG00000029634.15	Rnf6	1729.12	-0.446989	0.199272	0.00900665	0.0592779	-1.36319	0
ENSMUSG00000114278.2	Gm49027	75.2674	0.943696	0.689157	0.00901786	0.059329	1.92345	0
ENSMUSG00000034403.16	Pja1	2501.8	-0.359694	0.15155	0.00902257	0.0593372	-1.28315	0
ENSMUSG00000022476.8	Polr3h	324.449	0.46703	0.210735	0.00903456	0.0593932	1.38226	0
ENSMUSG00000035112.17	Wnk4	918.257	-0.472696	0.214513	0.0090442	0.0594338	-1.3877	0
ENSMUSG00000001829.17	Clpb	736.738	0.436279	0.192834	0.0090734	0.0596029	1.35311	0
ENSMUSG00000042462.4	Dctpp1	169.522	0.622499	0.318032	0.00907758	0.0596074	1.53954	0
ENSMUSG00000017715.11	Pgs1	528.132	0.465736	0.209982	0.00908694	0.0596233	1.38102	0
ENSMUSG00000028690.4	Mmachc	318.006	0.597636	0.298232	0.0090844	0.0596233	1.51323	0
ENSMUSG00000020589.17	Fam49a	84.0154	0.663494	0.35023	0.00909402	0.0596469	1.58391	0
ENSMUSG00000041426.12	Hibch	428.95	0.412663	0.179528	0.00910927	0.0597241	1.33114	0
ENSMUSG00000025872.5	Thoc3	653.504	0.390718	0.167701	0.00911858	0.0597394	1.31105	0
ENSMUSG00000052419.7	2610001J05Rik	933.934	0.414413	0.180472	0.00911815	0.0597394	1.33276	0
ENSMUSG00000097924.2	A730020E08Rik	158.046	0.569584	0.278478	0.00912835	0.0597806	1.4841	0
ENSMUSG00000002984.17	Tomm40	683.825	0.529015	0.250396	0.00914567	0.0598026	1.44294	0
ENSMUSG00000020308.6	Tpgs1	630.718	0.500085	0.231474	0.00913619	0.0598026	1.4143	0
ENSMUSG00000024805.16	Pcgf5	1023.51	-0.408242	0.178502	0.00914282	0.0598026	-1.32707	0
ENSMUSG00000040433.16	Zbtb38	725.984	-0.482878	0.221441	0.0091437	0.0598026	-1.39753	0
ENSMUSG00000001240.13	Ramp2	307.034	0.504117	0.23404	0.00914962	0.0598057	1.41826	0
ENSMUSG00000050812.18	Ecpas	3393.15	-0.411864	0.179645	0.00919497	0.0600792	-1.3304	0
ENSMUSG00000009376.15	Met	563.667	-0.516757	0.243126	0.009216	0.0601229	-1.43074	0
ENSMUSG00000025420.13	Katnal2	118.963	-0.548508	0.264962	0.00921908	0.0601229	-1.46257	0
ENSMUSG00000035686.8	Thrsp	103.806	0.82077	0.50966	0.00921854	0.0601229	1.76635	0
ENSMUSG00000050840.8	Cdh20	13.5866	1.14185	1.11056	0.00921919	0.0601229	2.20663	0
ENSMUSG00000072674.10	Plac9b	161.191	0.726978	0.41146	0.00921087	0.0601229	1.65517	0
ENSMUSG00000075270.11	Pde11a	22.132	1.01155	0.780018	0.00924289	0.0602545	2.01608	0
ENSMUSG00000035179.4	Ppp1r32	9.49988	0.409173	0.77815	0.00925698	0.0603234	1.32792	0
ENSMUSG00000036167.16	Pphln1	670.372	-0.426144	0.187919	0.00926665	0.0603463	-1.34364	0
ENSMUSG00000038332.13	Sesn1	1027.47	-0.410613	0.179249	0.00926752	0.0603463	-1.32925	0
ENSMUSG00000039217.13	Il18	35.6828	-0.789327	0.476088	0.00927527	0.0603738	-1.72827	0
ENSMUSG00000031799.10	Tpm4	3148.65	0.452352	0.202745	0.00930066	0.0604931	1.36827	0
ENSMUSG00000036880.10	Acaa2	515.06	-0.590654	0.296023	0.00929916	0.0604931	-1.50593	0
ENSMUSG00000036040.14	Adamtsl2	254.262	0.573724	0.282988	0.00933524	0.060695	1.48836	0
ENSMUSG00000018752.19	Tnfsfm13	97.5788	-0.619881	0.318345	0.00934743	0.0607095	-1.53675	0
ENSMUSG00000029480.13	Dhx37	366.566	0.615387	0.31448	0.00935107	0.0607095	1.53197	0
ENSMUSG00000050914.16	Ankrd37	321.283	0.561799	0.274515	0.00934383	0.0607095	1.47611	0
ENSMUSG00000097412.2	1810014B01Rik	105.449	-0.682284	0.372816	0.00935164	0.0607095	-1.60468	0
ENSMUSG00000000295.13	Hddc2	136.442	0.522792	0.247256	0.00936132	0.0607493	1.43673	0
ENSMUSG00000042808.8	Gpx2	640.262	0.649677	0.342461	0.00937749	0.0608313	1.56882	0
ENSMUSG00000104063.1	Pcdhgb7	154.618	-0.601395	0.304023	0.00941061	0.061023	-1.51718	0
ENSMUSG00000023249.15	Parp3	59.496	0.83983	0.543521	0.00942045	0.0610361	1.78984	0
ENSMUSG00000033174.17	Mgll	824.939	0.425844	0.187936	0.00941806	0.0610361	1.34336	0
ENSMUSG00000039470.15	Zdhhc2	6554.49	-0.566087	0.278995	0.00942331	0.0610361	-1.4805	0
ENSMUSG00000021306.11	Gpr137b	514.395	-0.500258	0.233823	0.00943449	0.0610397	-1.41447	0
ENSMUSG00000032177.17	Pde4a	100.163	-0.659901	0.35189	0.00943809	0.0610397	-1.57997	0
ENSMUSG00000039899.5	Fgl2	913.903	-0.506414	0.237552	0.00942845	0.0610397	-1.42051	0
ENSMUSG00000060950.12	Trmt61a	191.169	0.657605	0.350009	0.00943643	0.0610397	1.57746	0
ENSMUSG00000032115.14	Hyou1	13419.6	-0.563547	0.277828	0.00944679	0.0610639	-1.4779	0
ENSMUSG00000115279.1	Gm49273	172.538	-0.57833	0.288299	0.00944896	0.0610639	-1.49312	0
ENSMUSG00000029310.13	Nudt9	485.725	0.482158	0.221835	0.00947188	0.0611889	1.39683	0
ENSMUSG00000023484.14	Prph	484.791	0.838888	0.538203	0.00948697	0.0612633	1.78867	0
ENSMUSG00000090231.10	Cfb	35.1918	0.462018	0.924345	0.0094972	0.0613063	1.37747	0
ENSMUSG00000026750.6	Psmb7	2059.75	0.380123	0.16331	0.00952461	0.0614601	1.30145	0
ENSMUSG00000029687.16	Ezh2	324.282	-0.632583	0.331998	0.00953162	0.0614822	-1.55034	0
ENSMUSG00000030062.7	Rpn1	6536.34	-0.483056	0.223452	0.00957665	0.0617494	-1.3977	0
ENSMUSG00000029228.15	Lnx1	407.42	-0.469553	0.215029	0.00958702	0.061793	-1.38468	0
ENSMUSG00000020627.10	Klhl29	93.1267	0.624948	0.324569	0.00959962	0.061851	1.54216	0
ENSMUSG00000109829.1	Gm45605	37.6169	-0.78224	0.474436	0.00961027	0.0618964	-1.7198	0
ENSMUSG00000022883.11	Robo1	1022.06	-0.606482	0.311216	0.00964299	0.0620838	-1.52254	0
ENSMUSG00000040648.14	Ppip5k2	975.621	-0.466509	0.213395	0.00966124	0.0621779	-1.38176	0
ENSMUSG00000024640.9	Psat1	295.982	0.563037	0.277254	0.00967341	0.0622167	1.47738	0
ENSMUSG00000033728.14	Lrrc14	636.898	0.467073	0.213307	0.00967452	0.0622167	1.3823	0
ENSMUSG00000051517.14	Arhgef39	61.7756	-0.817074	0.521882	0.00968875	0.0622848	-1.76183	0
ENSMUSG00000028683.14	Eif2b3	375.82	0.399348	0.174191	0.00969497	0.0622956	1.31891	0
ENSMUSG00000118120.1	Gm33732	11.738	-1.12732	1.41807	0.0096977	0.0622956	-2.18452	0
ENSMUSG00000018293.4	Pfn1	2139.84	0.417362	0.184239	0.00971433	0.0623791	1.33548	0
ENSMUSG00000033805.12	Ephx4	65.8681	-0.625847	0.326794	0.00974634	0.0625612	-1.54312	0
ENSMUSG00000039110.15	Mycbpap	71.0086	-0.884297	0.643047	0.0097597	0.0626236	-1.84586	0
ENSMUSG00000017007.9	Rbpjl	48.4597	0.990123	0.804321	0.0097639	0.0626271	1.98635	0
ENSMUSG00000024248.14	Cox7a2l	4755.14	-0.464201	0.213756	0.00978523	0.0627404	-1.37955	0
ENSMUSG00000060733.13	Ipmk	1288.94	-0.430828	0.192299	0.00979201	0.0627604	-1.34801	0
ENSMUSG00000022555.12	Dgat1	280.036	0.513257	0.24365	0.00979809	0.0627759	1.42727	0
ENSMUSG00000020173.17	Cobl	268.994	-0.466037	0.213456	0.00980702	0.0628097	-1.38131	0
ENSMUSG00000102516.1	Gm38340	50.7657	-0.793827	0.486915	0.00981549	0.0628404	-1.73367	0
ENSMUSG00000042745.9	Id1	566.065	0.737892	0.428415	0.00983418	0.0629366	1.66774	0
ENSMUSG00000005882.18	Uqcc1	949.664	0.413991	0.182816	0.00985136	0.063023	1.33237	0
ENSMUSG00000070738.10	Dgkd	2814.37	0.350375	0.148681	0.00985806	0.0630423	1.27489	0
ENSMUSG00000032012.9	Nectin1	373.087	-0.560673	0.277672	0.00991889	0.063384	-1.47496	0
ENSMUSG00000041153.9	Osgin2	514.208	0.520189	0.248701	0.00991748	0.063384	1.43414	0
ENSMUSG00000027639.16	Samhd1	776.984	0.412002	0.18189	0.00992415	0.063394	1.33053	0
ENSMUSG00000042851.17	Zc3h6	336.81	-0.575648	0.289222	0.00993299	0.0634269	-1.49035	0
ENSMUSG00000020868.15	Xylt2	395.265	0.41723	0.184984	0.00994577	0.0634848	1.33536	0
ENSMUSG00000029992.14	Gfpt1	11175.8	-0.454419	0.207069	0.00996018	0.0635295	-1.37023	0
ENSMUSG00000034379.9	Wdr5b	229.49	-0.512414	0.244448	0.00995656	0.0635295	-1.42643	0
ENSMUSG00000037369.17	Kdm6a	1103.93	-0.537946	0.261984	0.00996946	0.063565	-1.4519	0
ENSMUSG00000031209.14	Heph	78.2068	0.683953	0.377685	0.00997895	0.0636019	1.60654	0
ENSMUSG00000076437.10	Selenoh	319.666	-0.480909	0.224116	0.00999551	0.0636838	-1.39562	0
ENSMUSG00000041729.15	Coro2b	1478.01	-0.341691	0.145608	0.0100465	0.0639847	-1.26724	0
ENSMUSG00000042428.6	Mgat3	1748.39	-0.436921	0.197173	0.010073	0.0641299	-1.35371	0
ENSMUSG00000015568.16	Lpl	3590.79	-0.623867	0.329141	0.0100919	0.0641885	-1.541	0
ENSMUSG00000027673.12	Ndufb5	1357.84	0.43491	0.195508	0.0100935	0.0641885	1.35183	0
ENSMUSG00000067818.6	Myl9	292.083	0.574263	0.288355	0.0100933	0.0641885	1.48892	0
ENSMUSG00000001441.13	Npepps	2441.36	-0.434563	0.195961	0.010121	0.0643401	-1.3515	0
ENSMUSG00000048329.7	Mfsd6l	359.913	-0.722794	0.424183	0.0102215	0.0649548	-1.65037	0
ENSMUSG00000021259.5	Cyp46a1	56.5828	-0.661163	0.363062	0.0102422	0.0650622	-1.58136	0
ENSMUSG00000029330.8	Cds1	1189.79	0.523828	0.251445	0.0102655	0.0651435	1.43777	0
ENSMUSG00000030145.14	Zfp248	148.874	-0.522828	0.253308	0.0102674	0.0651435	-1.43677	0
ENSMUSG00000032258.15	Lca5	215.298	-0.510907	0.244803	0.0102737	0.0651435	-1.42495	0
ENSMUSG00000045594.10	Glb1	1112	0.419464	0.187306	0.010274	0.0651435	1.33743	0
ENSMUSG00000078851.4	H2aw	789.748	-0.43412	0.196333	0.0102603	0.0651435	-1.35109	0
ENSMUSG00000028848.13	Gpn2	269.504	0.652972	0.354824	0.0102913	0.0652293	1.5724	0
ENSMUSG00000061461.11	Smim20	491.641	-0.417695	0.186881	0.0102974	0.0652437	-1.33579	0
ENSMUSG00000031753.16	Cog4	1343.55	0.386766	0.169113	0.0103181	0.0653503	1.30746	0
ENSMUSG00000069769.13	Msi2	4440.14	0.526573	0.255004	0.010341	0.0654716	1.4405	0
ENSMUSG00000029299.14	Abcg3	9.45168	1.13006	1.5377	0.0103491	0.0654986	2.18868	0
ENSMUSG00000116180.1	Gm49492	111.982	-0.7058	0.405779	0.0103561	0.0655187	-1.63105	0
ENSMUSG00000031861.16	Lpar2	45.3288	-0.742737	0.447016	0.0103653	0.0655528	-1.67335	0
ENSMUSG00000001930.17	Vwf	106.392	0.793029	0.500738	0.0103776	0.0655819	1.73271	0
ENSMUSG00000035165.14	Kcne3	24.6813	0.964976	0.835019	0.0103743	0.0655819	1.95203	0
ENSMUSG00000024829.12	Mrpl21	449.82	0.501981	0.23908	0.0103911	0.0656242	1.41616	0
ENSMUSG00000060962.12	Dmkn	29.8399	0.833147	0.545392	0.0103919	0.0656242	1.78157	0
ENSMUSG00000069744.7	Psmb3	1111.61	0.491789	0.232411	0.0104326	0.065857	1.40619	0
ENSMUSG00000020102.15	Slc16a7	105.19	-0.966834	0.895704	0.010444	0.0659047	-1.95455	0
ENSMUSG00000016942.6	Tmprss6	58.9109	-0.685678	0.390365	0.0104646	0.0659674	-1.60846	0
ENSMUSG00000062169.13	Cnih4	288.445	0.556615	0.278336	0.0104605	0.0659674	1.47081	0
ENSMUSG00000096936.1	Gm3510	10.006	-1.07609	1.53855	0.0104655	0.0659674	-2.10831	0
ENSMUSG00000020681.14	Ace	883.787	0.373995	0.162679	0.0104946	0.0660775	1.29594	0
ENSMUSG00000026098.13	Pms1	185.622	0.501716	0.239434	0.0104876	0.0660775	1.4159	0
ENSMUSG00000031357.3	Syap1	1790.23	0.345385	0.147163	0.0104913	0.0660775	1.27049	0
ENSMUSG00000026820.5	Ptges2	324.029	0.566433	0.285734	0.0105207	0.0661693	1.48086	0
ENSMUSG00000030603.16	Psmc4	1489.92	0.389513	0.171207	0.0105191	0.0661693	1.30995	0
ENSMUSG00000047989.11	Ino80c	298.413	-0.50221	0.239944	0.0105143	0.0661693	-1.41638	0
ENSMUSG00000031103.12	Elf4	203.891	-0.635683	0.342309	0.0105439	0.0662426	-1.55367	0
ENSMUSG00000078348.4	Sf3b5	536.716	0.563742	0.283445	0.010542	0.0662426	1.4781	0
ENSMUSG00000107994.1	D830050J10Rik	109.901	0.654224	0.35874	0.0105425	0.0662426	1.57377	0
ENSMUSG00000027500.10	Stmn2	543.18	0.776199	0.486387	0.0105881	0.0664957	1.71261	0
ENSMUSG00000029632.7	Ndufa4	2621.86	0.554399	0.276914	0.0106131	0.0666281	1.46856	0
ENSMUSG00000051984.13	Sec31b	20.8553	-0.96645	0.842625	0.0106277	0.0666953	-1.95403	0
ENSMUSG00000022811.17	Zfp148	2457.01	-0.433228	0.197028	0.0106367	0.0667034	-1.35025	0
ENSMUSG00000030340.16	Scnn1a	19.0637	-0.955226	0.735373	0.010633	0.0667034	-1.93888	0
ENSMUSG00000043051.17	Disc1	25.1764	-0.850873	0.585966	0.0106413	0.0667075	-1.80359	0
ENSMUSG00000004264.17	Phb2	1391.69	0.394323	0.174348	0.0106663	0.0667667	1.31433	0
ENSMUSG00000029838.11	Ptn	224.786	0.697156	0.39962	0.0106551	0.0667667	1.62131	0
ENSMUSG00000046722.14	Cdc42se1	1164.88	-0.405225	0.18086	0.0106632	0.0667667	-1.3243	0
ENSMUSG00000060240.12	Cend1	68.5116	0.872107	0.622814	0.0106631	0.0667667	1.83033	0
ENSMUSG00000025355.7	Mmp19	9.4985	0.945868	1.92632	0.0107096	0.066984	1.92635	0
ENSMUSG00000031574.8	Star	37.194	0.802373	0.521723	0.0107128	0.066984	1.74397	0
ENSMUSG00000066170.7	E230001N04Rik	67.0113	-0.780743	0.503306	0.0107115	0.066984	-1.71801	0
ENSMUSG00000027422.15	Rrbp1	5579.91	-0.55274	0.280813	0.0107292	0.0670624	-1.46687	0
ENSMUSG00000000399.10	Ndufa9	1484.84	0.346394	0.148898	0.0107553	0.0671508	1.27138	0
ENSMUSG00000022574.7	Naprt	69.8004	-0.703715	0.411228	0.0107582	0.0671508	-1.62869	0
ENSMUSG00000027864.9	Ptgfrn	370.015	0.545319	0.270936	0.0107515	0.0671508	1.45934	0
ENSMUSG00000067369.12	Trmt2b	672.849	-0.462877	0.215606	0.010759	0.0671508	-1.37829	0
ENSMUSG00000018405.7	Mrm1	284.594	0.466676	0.217869	0.010774	0.0672073	1.38192	0
ENSMUSG00000045973.18	Slc25a51	2437.91	-0.442192	0.20296	0.0107759	0.0672073	-1.35867	0
ENSMUSG00000064037.13	Gpn1	419.439	0.462538	0.215131	0.0107941	0.0672961	1.37796	0
ENSMUSG00000008690.15	Ncaph2	1606.33	0.394532	0.174838	0.0107991	0.0673033	1.31452	0
ENSMUSG00000033272.12	Slc35a4	1296.29	0.39337	0.174164	0.0108088	0.0673389	1.31346	0
ENSMUSG00000000339.14	Rtca	489.928	0.428863	0.1947	0.010823	0.0674028	1.34617	0
ENSMUSG00000047238.4	Mageh1	2876.07	-0.470946	0.221392	0.0108353	0.0674553	-1.38602	0
ENSMUSG00000025236.11	Adpgk	576.053	0.505822	0.2439	0.0108517	0.0674838	1.41993	0
ENSMUSG00000029103.16	Lrpap1	2130.09	-0.356213	0.154469	0.0108483	0.0674838	-1.28006	0
ENSMUSG00000035133.9	Arhgap5	3874.47	-0.468447	0.220706	0.0108459	0.0674838	-1.38362	0
ENSMUSG00000028729.15	Ebna1bp2	1045.5	0.428696	0.194822	0.010883	0.0676333	1.34602	0
ENSMUSG00000075595.9	Zfp652	1676.62	-0.376662	0.165516	0.0108837	0.0676333	-1.29833	0
ENSMUSG00000078789.9	Dph1	361.078	0.509031	0.246574	0.0109324	0.0679113	1.42309	0
ENSMUSG00000032827.15	Ppp1r9a	1104.25	-0.469274	0.220735	0.0109419	0.067946	-1.38441	0
ENSMUSG00000022961.18	Son	10866.8	-0.325057	0.139637	0.0109472	0.0679546	-1.25271	0
ENSMUSG00000106978.1	N4bp2os	123.794	-0.558838	0.283194	0.0109736	0.0680937	-1.47308	0
ENSMUSG00000004902.7	Slc25a18	8.08871	0.500346	1.04594	0.0110165	0.0683347	1.41455	0
ENSMUSG00000078607.5	1810010H24Rik	75.1871	-0.614237	0.328242	0.0110209	0.0683378	-1.53075	0
ENSMUSG00000020782.18	Llgl2	2106.92	-0.406337	0.182663	0.011052	0.0685055	-1.32532	0
ENSMUSG00000049307.6	Fut4	81.7113	-0.722393	0.433504	0.011086	0.0686913	-1.64992	0
ENSMUSG00000033342.15	Plppr5	19.9229	0.911039	0.695157	0.0111116	0.0688256	1.8804	0
ENSMUSG00000026958.13	Dpp7	568.557	-0.564843	0.288646	0.0111301	0.0689147	-1.47923	0
ENSMUSG00000049265.7	Kcnk3	439.326	-0.670581	0.381415	0.0111455	0.0689853	-1.59171	0
ENSMUSG00000050272.10	Dscam	109.297	-0.617825	0.332712	0.0111544	0.0690154	-1.53456	0
ENSMUSG00000096221.3	1500002C15Rik	91.9813	-0.577679	0.299989	0.0112217	0.0694067	-1.49245	0
ENSMUSG00000104413.1	Gm37065	35.4884	0.985945	1.19676	0.0112561	0.0695946	1.98061	0
ENSMUSG00000026179.14	Pnkd	632.153	0.451043	0.209949	0.0112762	0.0696935	1.36703	0
ENSMUSG00000024414.13	Mrpl27	512.187	0.450857	0.209824	0.0112815	0.0697015	1.36685	0
ENSMUSG00000020444.19	Guk1	1736.62	-0.45059	0.210161	0.0112904	0.0697315	-1.3666	0
ENSMUSG00000039814.15	Xkr5	13.6515	-1.01178	1.01694	0.011309	0.0697956	-2.0164	0
ENSMUSG00000061751.16	Kalrn	533.505	-0.482886	0.231026	0.0113061	0.0697956	-1.39754	0
ENSMUSG00000031155.16	Pim2	1917.23	0.353756	0.153859	0.0113212	0.0698209	1.27788	0
ENSMUSG00000075256.9	Cerkl	663.918	-0.360523	0.157888	0.0113173	0.0698209	-1.28389	0
ENSMUSG00000093565.1	Rab26os	78.8298	-0.664095	0.377462	0.0113556	0.0700077	-1.58457	0
ENSMUSG00000028343.10	Erp44	1951.48	-0.493912	0.241124	0.0114216	0.0703892	-1.40826	0
ENSMUSG00000031024.13	St5	1417.92	-0.371457	0.163505	0.0114312	0.070423	-1.29366	0
ENSMUSG00000102828.5	Gm38182	11.6622	-0.477781	0.931565	0.0114375	0.0704366	-1.3926	0
ENSMUSG00000039357.2	Fut11	349.837	-0.451473	0.211288	0.0114425	0.0704419	-1.36744	0
ENSMUSG00000052707.8	Tnrc6a	3217.9	-0.352852	0.152073	0.0114483	0.0704525	-1.27708	0
ENSMUSG00000038005.15	Hpf1	567.786	0.402489	0.181272	0.0114843	0.070649	1.32179	0
ENSMUSG00000118633.1	CT868690.1	9.66041	-0.58133	1.3877	0.0114913	0.0706666	-1.49623	0
ENSMUSG00000034898.17	Filip1	1354.99	-0.480515	0.230441	0.0115115	0.0707399	-1.39524	0
ENSMUSG00000067194.6	Eif1ax	961.704	0.403176	0.181778	0.0115097	0.0707399	1.32242	0
ENSMUSG00000032513.8	Gorasp1	747.344	-0.386298	0.172683	0.0115175	0.0707515	-1.30704	0
ENSMUSG00000031026.15	Trim66	29.0382	-0.826776	0.578177	0.0115434	0.0708854	-1.77372	0
ENSMUSG00000024902.5	Mrpl11	484.797	0.480643	0.230139	0.0115487	0.0708927	1.39537	0
ENSMUSG00000110357.1	A030001D20Rik	153.79	-0.528818	0.264943	0.0115729	0.0710157	-1.44275	0
ENSMUSG00000028763.18	Hspg2	4314.55	0.549905	0.279322	0.0115817	0.0710186	1.46399	0
ENSMUSG00000079557.11	2021-03-02	572.597	0.40723	0.184377	0.0115796	0.0710186	1.32614	0
ENSMUSG00000035151.12	Elmod2	777.123	-0.363248	0.159936	0.0115984	0.0710955	-1.28632	0
ENSMUSG00000002767.13	Mrpl2	630.62	0.441599	0.205204	0.0116129	0.071108	1.35811	0
ENSMUSG00000007050.17	Lsm2	160.327	0.589088	0.310696	0.0116105	0.071108	1.5043	0
ENSMUSG00000069267.2	H3c2	8.78618	0.312879	0.574423	0.011611	0.071108	1.24218	0
ENSMUSG00000039640.7	Mrpl12	529.36	0.569647	0.295627	0.0116524	0.0713249	1.48416	0
ENSMUSG00000095348.1	Gm3892	8.75236	-0.313862	0.577177	0.0116567	0.0713257	-1.24303	0
ENSMUSG00000028931.12	Kcnab2	212.756	0.528157	0.263468	0.01167	0.0713444	1.44209	0
ENSMUSG00000035754.8	Wdr18	618.575	0.374144	0.165852	0.011671	0.0713444	1.29607	0
ENSMUSG00000078870.9	Gm14410	249.779	0.533364	0.267415	0.0116723	0.0713444	1.4473	0
ENSMUSG00000085521.4	4930526A20Rik	58.9345	-0.821086	0.57901	0.011698	0.0714762	-1.76674	0
ENSMUSG00000053559.13	Smagp	77.9687	0.715653	0.43609	0.011716	0.0715604	1.64223	0
ENSMUSG00000044139.12	Prss53	12220	-0.446904	0.210007	0.011727	0.0716021	-1.36311	0
ENSMUSG00000020354.15	Sgcd	42.6202	0.739925	0.461699	0.0117519	0.0717289	1.67009	0
ENSMUSG00000038007.14	Acer2	246.453	-0.507514	0.250496	0.0117793	0.0718703	-1.4216	0
ENSMUSG00000027245.11	Hypk	285.085	0.409369	0.186318	0.0118065	0.0720108	1.3281	0
ENSMUSG00000040280.10	Ndufa4l2	155.655	0.558375	0.288012	0.0118425	0.072205	1.47261	0
ENSMUSG00000044548.11	Dact1	504.203	-0.613353	0.335532	0.0118557	0.0722592	-1.52981	0
ENSMUSG00000032434.9	Cmtm6	1622.87	0.334618	0.145159	0.011875	0.0723511	1.26104	0
ENSMUSG00000047921.17	Trappc9	1598.96	0.39793	0.179805	0.0118835	0.0723772	1.31762	0
ENSMUSG00000034343.14	Ube2f	680.535	0.370164	0.164391	0.0119481	0.0727452	1.2925	0
ENSMUSG00000002346.16	Slc25a42	394.253	-0.420033	0.193563	0.0119637	0.0728141	-1.33796	0
ENSMUSG00000015488.14	Cacfd1	1383.7	-0.38883	0.174975	0.0119738	0.0728499	-1.30933	0
ENSMUSG00000040447.15	Spns2	179.029	0.526584	0.264349	0.0119804	0.0728642	1.44051	0
ENSMUSG00000029223.12	Uchl1	1033.15	0.484478	0.234529	0.0120244	0.0731059	1.39908	0
ENSMUSG00000040666.19	Sh3bgr	87.1472	-0.600998	0.325254	0.0120311	0.0731206	-1.51677	0
ENSMUSG00000023019.12	Gpd1	646.156	-0.41517	0.190821	0.0120363	0.0731265	-1.33346	0
ENSMUSG00000000276.11	Dgke	1481.15	0.48571	0.23786	0.0120567	0.0731558	1.40027	0
ENSMUSG00000001555.10	Fkbp10	129.423	0.708079	0.430836	0.0120582	0.0731558	1.63363	0
ENSMUSG00000031328.16	Flna	1875.68	0.568258	0.29713	0.0120553	0.0731558	1.48273	0
ENSMUSG00000079884.6	Gm10698	85.9635	-0.027326	0.363774	0.0120521	0.0731558	-1.01912	0
ENSMUSG00000024184.15	Pdia2	454.595	0.926337	1.24055	0.0120718	0.0731863	1.90044	0
ENSMUSG00000027495.4	Fam210b	1560.32	-0.558263	0.290191	0.0120714	0.0731863	-1.47249	0
ENSMUSG00000090150.10	Acad11	910.162	0.38294	0.171773	0.0120764	0.0731881	1.304	0
ENSMUSG00000030787.4	Lyve1	331.301	-0.794294	0.555084	0.0121091	0.0733605	-1.73423	0
ENSMUSG00000034744.13	Nagk	1039.74	-0.425222	0.197272	0.0121185	0.0733919	-1.34278	0
ENSMUSG00000022884.15	Eif4a2	15453.7	-0.37483	0.167363	0.0121232	0.0733944	-1.29669	0
ENSMUSG00000024236.18	Svil	1774.05	0.359159	0.158835	0.0121461	0.0735069	1.28268	0
ENSMUSG00000045259.4	Klhdc9	53.5769	-0.654437	0.376214	0.0121554	0.0735115	-1.574	0
ENSMUSG00000116288.1	Gm41349	19.1102	-0.935486	0.916124	0.0121538	0.0735115	-1.91253	0
ENSMUSG00000028958.15	Tmub1	269.173	-0.452427	0.214631	0.0121914	0.0737029	-1.36834	0
ENSMUSG00000027459.16	Fam110a	292.995	-0.527828	0.26744	0.0122018	0.0737153	-1.44176	0
ENSMUSG00000103560.1	Gm38070	3354.66	-0.712016	0.43976	0.012202	0.0737153	-1.63809	0
ENSMUSG00000031767.13	Nudt7	654.627	-0.424911	0.197483	0.0122198	0.0737716	-1.34249	0
ENSMUSG00000033276.18	Stk36	168.542	-0.499809	0.246731	0.01222	0.0737716	-1.41403	0
ENSMUSG00000088835.1	Gm23547	11.73	0.220019	0.460987	0.0122262	0.0737829	1.16475	0
ENSMUSG00000071550.14	Cfap44	53.724	-0.879885	0.792617	0.0122423	0.0738542	-1.84023	0
ENSMUSG00000072623.6	Zfp9	1227.97	-0.4268	0.198734	0.0122669	0.0739765	-1.34425	0
ENSMUSG00000067279.3	Ppp1r3c	107.66	0.660605	0.381668	0.0122917	0.0741001	1.58075	0
ENSMUSG00000000555.8	Itga5	254.988	0.642491	0.364516	0.0123101	0.074178	1.56102	0
ENSMUSG00000076441.9	Ass1	830.785	0.654135	0.376353	0.0123132	0.074178	1.57367	0
ENSMUSG00000115821.1	6330576A10Rik	12.8445	-0.952375	1.45308	0.0123308	0.0742577	-1.93506	0
ENSMUSG00000110767.1	Gm31432	44.4957	-0.792053	0.553419	0.0123362	0.0742641	-1.73154	0
ENSMUSG00000039452.6	Snx22	8.29076	0.472845	0.923783	0.0123522	0.074334	1.38784	0
ENSMUSG00000034145.14	Tmem63c	288.448	0.437415	0.205184	0.012373	0.0744332	1.35418	0
ENSMUSG00000042246.5	Tmc7	166.207	0.469168	0.225986	0.0124028	0.074534	1.38431	0
ENSMUSG00000112388.1	AI463170	31.5749	-0.773679	0.523628	0.0123958	0.074534	-1.70962	0
ENSMUSG00000118376.1	Gm9926	18.1396	-0.903561	0.893113	0.0124009	0.074534	-1.87068	0
ENSMUSG00000027994.14	Mcub	66.0409	-0.719287	0.453415	0.0124088	0.0745443	-1.64637	0
ENSMUSG00000027544.16	Nfatc2	843.925	-0.53502	0.274078	0.0124216	0.0745947	-1.44896	0
ENSMUSG00000009575.14	Cbx5	2486.54	-0.395936	0.180756	0.012441	0.0746851	-1.3158	0
ENSMUSG00000025369.15	Smarcc2	4535.79	-0.325467	0.141366	0.0124618	0.074775	-1.25307	0
ENSMUSG00000068758.8	Il3ra	171.503	-0.526248	0.26805	0.0124647	0.074775	-1.44018	0
ENSMUSG00000070858.12	Gm1673	121.74	0.658978	0.383799	0.0124705	0.0747839	1.57896	0
ENSMUSG00000022407.10	Adsl	752.395	0.444094	0.209767	0.0124846	0.0748423	1.36046	0
ENSMUSG00000025272.16	Tro	208.871	-0.559995	0.294761	0.0125122	0.0749814	-1.47426	0
ENSMUSG00000115987.1	Vps28	1366.6	0.425253	0.198049	0.0125242	0.0750268	1.34281	0
ENSMUSG00000036299.5	BC031181	1826.39	0.417779	0.193306	0.0125353	0.075067	1.33587	0
ENSMUSG00000000149.10	Gna12	1260.22	0.377811	0.170226	0.012554	0.0751531	1.29937	0
ENSMUSG00000031028.14	Tub	74.034	0.874917	0.731717	0.0125626	0.0751782	1.8339	0
ENSMUSG00000009628.14	Tex15	9.11399	-0.743544	1.95861	0.012574	0.0752013	-1.67428	0
ENSMUSG00000021102.4	Glrx5	702.384	-0.364477	0.163069	0.0125752	0.0752013	-1.28741	0
ENSMUSG00000001098.15	Kctd10	1192.29	0.367431	0.164355	0.0125956	0.0752182	1.29005	0
ENSMUSG00000002413.15	Braf	2860.36	-0.458551	0.220443	0.0125945	0.0752182	-1.37416	0
ENSMUSG00000027848.12	Olfml3	164.982	0.551235	0.286145	0.0125893	0.0752182	1.46534	0
ENSMUSG00000063145.10	Bbs5	220.918	0.52706	0.268132	0.0125852	0.0752182	1.44099	0
ENSMUSG00000026189.13	Pecr	322.647	-0.468117	0.226487	0.0126223	0.0753513	-1.3833	0
ENSMUSG00000031207.16	Msn	1753.04	0.560894	0.294677	0.0126379	0.0754181	1.47518	0
ENSMUSG00000054863.9	Tafa5	790.502	0.405961	0.186678	0.0126518	0.0754749	1.32497	0
ENSMUSG00000097283.1	Gm26686	31.669	-0.752845	0.499935	0.0126621	0.075498	-1.68511	0
ENSMUSG00000102785.5	Gm2447	20.6707	0.881623	0.711098	0.0126645	0.075498	1.84245	0
ENSMUSG00000044393.15	Dsg2	1179.65	0.355558	0.157994	0.0126762	0.0755417	1.27948	0
ENSMUSG00000026837.16	Col5a1	398.472	0.669986	0.396895	0.0126943	0.0756235	1.59106	0
ENSMUSG00000003420.8	Fcgrt	276.973	0.535549	0.274904	0.0127271	0.0757923	1.44949	0
ENSMUSG00000055024.12	Ep300	2427.22	-0.39846	0.183153	0.0127703	0.0760231	-1.3181	0
ENSMUSG00000044676.10	Zfp612	1581.43	-0.493795	0.245638	0.0128037	0.0761958	-1.40814	0
ENSMUSG00000067547.6	Gm7666	203.733	0.691947	0.424032	0.0128253	0.0762714	1.61546	0
ENSMUSG00000075316.11	Scn9a	1972.11	0.373989	0.16836	0.0128215	0.0762714	1.29593	0
ENSMUSG00000025813.14	Homer2	29.6822	0.824825	0.618217	0.0128379	0.0763198	1.77132	0
ENSMUSG00000027637.3	Rab5if	562.122	0.421906	0.197163	0.0128831	0.0765618	1.3397	0
ENSMUSG00000019437.17	Tlcd1	231.319	0.50752	0.255281	0.0129244	0.0767803	1.4216	0
ENSMUSG00000068037.11	Mas1	15.398	-0.922398	0.960311	0.0129512	0.0769133	-1.89526	0
ENSMUSG00000047797.14	Gjb1	13.0668	0.945343	1.18031	0.0129563	0.0769167	1.92565	0
ENSMUSG00000033705.17	Stard9	226.177	0.496418	0.247344	0.0129802	0.0770318	1.41071	0
ENSMUSG00000038451.13	Spsb2	501.195	0.46359	0.22447	0.0129968	0.0771038	1.37897	0
ENSMUSG00000026824.11	Kcnj3	83.3158	-0.699109	0.435613	0.01302	0.0771739	-1.6235	0
ENSMUSG00000027374.12	Mrps5	672.308	0.416457	0.194394	0.013044	0.0771739	1.33465	0
ENSMUSG00000027809.14	Etfdh	1133.46	0.365721	0.164288	0.0130273	0.0771739	1.28853	0
ENSMUSG00000029404.15	Arl6ip4	569.948	0.387515	0.176919	0.0130195	0.0771739	1.30814	0
ENSMUSG00000031897.9	Psmb10	391.602	0.496666	0.247655	0.0130446	0.0771739	1.41095	0
ENSMUSG00000034255.17	Arhgap27	140.191	0.543279	0.283419	0.0130234	0.0771739	1.45728	0
ENSMUSG00000037905.13	Bri3bp	457.891	0.395188	0.181254	0.0130338	0.0771739	1.31511	0
ENSMUSG00000046876.16	Atxn1	663.262	-0.469556	0.229152	0.0130436	0.0771739	-1.38468	0
ENSMUSG00000043895.6	S1pr2	43.9672	0.821096	0.663207	0.0130587	0.0772304	1.76675	0
ENSMUSG00000049881.13	2810025M15Rik	299.171	0.547221	0.287192	0.0130843	0.0773556	1.46127	0
ENSMUSG00000118125.1	Gm50387	187.139	0.616123	0.347012	0.0131122	0.0774936	1.53275	0
ENSMUSG00000030086.16	Chchd6	464.213	0.434588	0.205988	0.0131419	0.0775865	1.35153	0
ENSMUSG00000031351.15	Zfp185	38.6113	-0.789958	0.570576	0.013146	0.0775865	-1.72902	0
ENSMUSG00000031503.13	Col4a2	7788.57	0.630217	0.354049	0.013134	0.0775865	1.5478	0
ENSMUSG00000053886.4	Sh2d4a	10.79	0.591815	1.33854	0.0131405	0.0775865	1.50714	0
ENSMUSG00000026479.13	Lamc2	615.686	0.471913	0.230634	0.0131736	0.0776186	1.38695	0
ENSMUSG00000028970.9	Abcb1b	45.307	0.779146	0.552207	0.0131825	0.0776186	1.71611	0
ENSMUSG00000030341.17	Tnfrsf1a	557.572	-0.423563	0.199284	0.013176	0.0776186	-1.34124	0
ENSMUSG00000038540.14	Tmc3	89.6318	0.767989	0.531962	0.0131744	0.0776186	1.70289	0
ENSMUSG00000050966.9	Lin28a	10.6156	-0.337491	0.59695	0.0131679	0.0776186	-1.26356	0
ENSMUSG00000086549.1	Gm13648	62.1709	-0.704577	0.447987	0.0131832	0.0776186	-1.62967	0
ENSMUSG00000116895.1	Gm3435	136.013	0.627273	0.358409	0.0131763	0.0776186	1.54464	0
ENSMUSG00000029507.16	Pus1	338.672	0.508202	0.256889	0.013195	0.0776617	1.42228	0
ENSMUSG00000028356.4	Ambp	398.031	-0.461469	0.224235	0.013226	0.0777702	-1.37694	0
ENSMUSG00000031833.10	Mast3	2167.07	-0.444282	0.212931	0.0132194	0.0777702	-1.36064	0
ENSMUSG00000039611.2	Tmem246	401.916	0.447398	0.214361	0.0132271	0.0777702	1.36358	0
ENSMUSG00000035184.15	Fam124a	23.4218	0.855609	0.713977	0.0132414	0.0778278	1.80952	0
ENSMUSG00000028291.7	Akirin2	782.24	0.347749	0.155076	0.0132621	0.0778961	1.27257	0
ENSMUSG00000039377.7	Hlx	166.668	0.731243	0.48001	0.0132607	0.0778961	1.66007	0
ENSMUSG00000034292.13	Traf3ip1	261.604	0.438884	0.208984	0.0132707	0.077898	1.35556	0
ENSMUSG00000039787.13	Cercam	33.6814	-0.783976	0.563212	0.0132715	0.077898	-1.72187	0
ENSMUSG00000073293.4	Nudt10	189.855	0.471792	0.230764	0.0132776	0.0779072	1.38683	0
ENSMUSG00000025487.15	Psmd13	1681.4	0.385313	0.176262	0.0132852	0.0779251	1.30614	0
ENSMUSG00000031004.8	Mki67	1983.31	-0.629825	0.364387	0.0132924	0.0779407	-1.54738	0
ENSMUSG00000028670.14	Lypla2	1784.27	0.355056	0.159162	0.0132995	0.0779557	1.27903	0
ENSMUSG00000097654.1	Gm26714	11.1038	0.653053	1.54643	0.0133234	0.0780688	1.57249	0
ENSMUSG00000026895.7	Ndufa8	994.128	0.374594	0.170265	0.0133472	0.0781816	1.29647	0
ENSMUSG00000111063.1	Zkscan7	39.9722	-0.729889	0.481923	0.0133581	0.0782189	-1.65851	0
ENSMUSG00000069072.9	Slc7a14	7553.11	-0.420926	0.198525	0.0134052	0.078468	-1.33879	0
ENSMUSG00000032392.11	Parp16	400.096	-0.567934	0.307286	0.0134144	0.078495	-1.4824	0
ENSMUSG00000042408.13	Zmym6	735.994	-0.379654	0.171285	0.0134292	0.0785546	-1.30103	0
ENSMUSG00000016349.10	Eef1a2	735.979	-0.579874	0.319229	0.0134463	0.0786277	-1.49472	0
ENSMUSG00000097204.2	Gm17690	211.311	-0.479705	0.237934	0.0134973	0.078899	-1.39446	0
ENSMUSG00000016200.14	Syt14	2033.94	-0.449807	0.217744	0.0135541	0.0792044	-1.36586	0
ENSMUSG00000023010.15	Tmbim6	7798.04	-0.324553	0.143402	0.0135977	0.0793777	-1.25228	0
ENSMUSG00000032178.14	Ilf3	2162.77	-0.333114	0.147893	0.0135937	0.0793777	-1.25973	0
ENSMUSG00000037492.16	Zmat4	12.8667	0.927376	1.02782	0.0135927	0.0793777	1.90181	0
ENSMUSG00000024958.13	Gpr137	632.931	0.580131	0.317686	0.0136034	0.079384	1.49498	0
ENSMUSG00000097287.3	D130017N08Rik	218.995	-0.44892	0.217197	0.0136108	0.0793999	-1.36502	0
ENSMUSG00000069020.9	Urm1	628.115	0.407048	0.190116	0.0136174	0.0794114	1.32597	0
ENSMUSG00000006763.14	Saal1	197.074	0.482917	0.240305	0.0136223	0.0794131	1.39757	0
ENSMUSG00000020387.15	Jade2	1354.42	-0.473519	0.234264	0.0136308	0.0794358	-1.38849	0
ENSMUSG00000025138.14	Sirt7	813.696	0.532565	0.277892	0.0136682	0.0796268	1.4465	0
ENSMUSG00000021390.6	Ogn	35.6207	0.71394	0.458644	0.0137048	0.079813	1.64028	0
ENSMUSG00000039615.9	Stub1	2171.81	0.366056	0.166075	0.0137195	0.0798714	1.28882	0
ENSMUSG00000043460.7	Elfn2	18.3928	0.727004	1.35246	0.0137323	0.0799185	1.6552	0
ENSMUSG00000053646.13	Plxnb1	1534.21	-0.361265	0.163891	0.0137378	0.0799233	-1.28455	0
ENSMUSG00000030200.13	Bcl2l14	17.6745	-0.869996	0.886892	0.0137449	0.0799379	-1.82766	0
ENSMUSG00000038546.9	Ranbp9	1129.75	-0.388683	0.1797	0.0137533	0.0799594	-1.3092	0
ENSMUSG00000103857.1	Gm37249	32.8286	-0.766712	0.546308	0.0137747	0.0800569	-1.70139	0
ENSMUSG00000022246.14	Rai14	276.021	0.497507	0.251339	0.0137871	0.0801013	1.41177	0
ENSMUSG00000019841.15	Rev3l	1858.06	-0.373821	0.171193	0.0138091	0.0801753	-1.29578	0
ENSMUSG00000031158.11	Timm17b	687.493	0.454248	0.221075	0.0138082	0.0801753	1.37007	0
ENSMUSG00000017631.19	Abr	3730.27	0.327289	0.14519	0.0138558	0.0804009	1.25465	0
ENSMUSG00000040990.17	Sh3kbp1	706.172	0.47124	0.232645	0.0138574	0.0804009	1.3863	0
ENSMUSG00000039087.17	Rreb1	898.07	-0.506107	0.259227	0.013867	0.0804298	-1.42021	0
ENSMUSG00000066113.16	Adamtsl1	40.3337	0.739082	0.499366	0.013902	0.0806052	1.66911	0
ENSMUSG00000026544.6	Dusp23	340.754	0.544109	0.288319	0.0139243	0.0806533	1.45812	0
ENSMUSG00000034282.3	Evpl	452.515	-0.472259	0.234395	0.0139248	0.0806533	-1.38728	0
ENSMUSG00000046756.10	Mrps7	661.418	0.42714	0.203623	0.0139278	0.0806533	1.34457	0
ENSMUSG00000095325.3	Zfp870	89.8575	-0.738947	0.515062	0.0139291	0.0806533	-1.66896	0
ENSMUSG00000038192.5	Cer1	58.8385	0.626038	0.362663	0.0139435	0.0807096	1.54332	0
ENSMUSG00000032207.10	Lipc	7.33267	0.542153	1.12379	0.0139538	0.0807418	1.45614	0
ENSMUSG00000025925.14	Terf1	277.982	-0.495351	0.251311	0.0139614	0.080755	-1.40966	0
ENSMUSG00000029166.14	Mapre3	1636.78	-0.328795	0.146487	0.0139655	0.080755	-1.25596	0
ENSMUSG00000097305.2	Gm17276	8.72845	-0.442457	0.81519	0.0139969	0.0809095	-1.35892	0
ENSMUSG00000000409.14	Lck	37.3156	-0.830897	0.879831	0.0140161	0.0809109	-1.77879	0
ENSMUSG00000028643.11	Svbp	97.9165	0.581378	0.321732	0.0140106	0.0809109	1.49628	0
ENSMUSG00000036097.8	Slf2	1181.64	-0.374666	0.172373	0.014013	0.0809109	-1.29654	0
ENSMUSG00000087390.1	Gm7598	55.2682	-0.682581	0.429868	0.0140091	0.0809109	-1.60501	0
ENSMUSG00000048058.17	Ldlrad3	398.58	0.580096	0.320228	0.0140253	0.0809369	1.49495	0
ENSMUSG00000028261.13	Ndufaf4	479.144	0.519039	0.269168	0.0140379	0.0809824	1.433	0
ENSMUSG00000028159.14	Dapp1	169.943	-0.523403	0.272673	0.014071	0.0811458	-1.43734	0
ENSMUSG00000074622.4	Mafb	2290.74	-0.462812	0.229891	0.0140839	0.0811838	-1.37823	0
ENSMUSG00000090071.4	Cdk5r2	641.123	-0.451317	0.220476	0.014087	0.0811838	-1.36729	0
ENSMUSG00000024500.20	Ppp2r2b	265.302	0.425286	0.202771	0.0140943	0.0811987	1.34284	0
ENSMUSG00000039735.16	Fnbp1l	675.453	-0.487375	0.245966	0.0141081	0.0812508	-1.40189	0
ENSMUSG00000015745.9	Plekho1	246.102	0.523918	0.273251	0.0141201	0.0812651	1.43785	0
ENSMUSG00000032297.11	Celf6	428.134	0.449156	0.218677	0.0141199	0.0812651	1.36524	0
ENSMUSG00000020737.12	Jpt1	549.4	0.470046	0.233058	0.0141361	0.0813301	1.38515	0
ENSMUSG00000078439.9	Smim24	90.8706	-0.624165	0.367457	0.0141704	0.0814998	-1.54132	0
ENSMUSG00000024078.7	Ttc27	341.77	0.421258	0.200467	0.0141973	0.0816062	1.3391	0
ENSMUSG00000032715.9	Trib3	64.7144	-0.778374	1.34443	0.0141984	0.0816062	-1.7152	0
ENSMUSG00000079450.11	Cldn34c1	117.588	0.58234	0.323353	0.0142099	0.0816178	1.49728	0
ENSMUSG00000085573.1	Gm15418	27.4794	-0.862588	0.838888	0.0142067	0.0816178	-1.8183	0
ENSMUSG00000022759.15	Lrrc74b	8.79494	-0.484366	0.926967	0.0142646	0.0819046	-1.39897	0
ENSMUSG00000056481.7	Cd248	129.802	0.634247	0.374738	0.014279	0.0819598	1.55213	0
ENSMUSG00000063171.4	Rps4l	927.038	-0.435647	0.210932	0.0143176	0.0821539	-1.35252	0
ENSMUSG00000041741.10	Pde3a	430.453	-0.566261	0.310921	0.0143236	0.0821609	-1.48068	0
ENSMUSG00000032812.18	Arap1	1310.36	-0.510585	0.265033	0.0143357	0.0822028	-1.42463	0
ENSMUSG00000040312.14	Cchcr1	187.094	-0.537542	0.287449	0.0143407	0.0822038	-1.4515	0
ENSMUSG00000067370.4	B3galt4	109.581	-0.647637	0.394716	0.0143523	0.0822428	-1.5666	0
ENSMUSG00000019734.16	Tmc4	1697.96	-0.452302	0.221315	0.0143772	0.0823305	-1.36822	0
ENSMUSG00000030879.10	Mrpl17	1085.62	0.461752	0.228191	0.0143745	0.0823305	1.37721	0
ENSMUSG00000024312.10	Wdr46	341.594	0.475034	0.237575	0.0143866	0.0823472	1.38995	0
ENSMUSG00000031684.11	Slc10a7	533.655	-0.523209	0.275199	0.0143897	0.0823472	-1.43715	0
ENSMUSG00000026603.13	Smyd2	1332.34	0.326205	0.145592	0.0144004	0.0823622	1.25371	0
ENSMUSG00000090386.10	Mir99ahg	31.86	-0.728161	0.492139	0.014402	0.0823622	-1.65653	0
ENSMUSG00000000881.12	Dlg3	1016.11	-0.34181	0.154445	0.0144515	0.082605	-1.26735	0
ENSMUSG00000031730.18	Dhodh	255.939	0.56992	0.314507	0.0144541	0.082605	1.48444	0
ENSMUSG00000015189.12	Casd1	978.408	-0.39972	0.188199	0.0144892	0.0827781	-1.31925	0
ENSMUSG00000033389.16	Arhgap44	745.953	0.434852	0.210258	0.0145029	0.0828264	1.35177	0
ENSMUSG00000041718.16	Alg13	150.735	0.544416	0.293255	0.0145073	0.0828264	1.45843	0
ENSMUSG00000020473.13	Aebp1	119.64	0.614042	0.356363	0.0145942	0.0832946	1.53054	0
ENSMUSG00000020708.12	Psmc5	1588.51	0.34963	0.15882	0.0146127	0.0833726	1.27423	0
ENSMUSG00000001802.16	Lrp3	1095.9	-0.385	0.179747	0.0146405	0.0835034	-1.30586	0
ENSMUSG00000112346.1	Gm48768	112.592	-0.573696	0.320339	0.0146767	0.0836822	-1.48833	0
ENSMUSG00000049036.7	Tmem121	68.2258	-0.740195	0.535169	0.0146961	0.0837371	-1.6704	0
ENSMUSG00000074472.10	Zfp872	21.9769	-0.758344	1.21617	0.0146936	0.0837371	-1.69155	0
ENSMUSG00000034918.8	Cdhr2	304.133	0.476105	0.23933	0.0147051	0.0837605	1.39098	0
ENSMUSG00000026799.15	Med27	313.198	0.458887	0.227559	0.0147106	0.0837641	1.37448	0
ENSMUSG00000021990.16	Spata13	806.579	-0.510007	0.266143	0.0147472	0.0839145	-1.42406	0
ENSMUSG00000025423.16	Pias2	1322.05	-0.348868	0.158753	0.014745	0.0839145	-1.27356	0
ENSMUSG00000111327.1	Gm48401	20.0897	-0.84848	0.827855	0.0147517	0.0839145	-1.8006	0
ENSMUSG00000002881.14	Nab1	683.576	0.513324	0.267928	0.0147791	0.0839836	1.42734	0
ENSMUSG00000020706.13	Ftsj3	788.268	0.419179	0.200893	0.0147884	0.0839836	1.33717	0
ENSMUSG00000022119.15	Rbm26	1504.87	-0.394768	0.185735	0.0147776	0.0839836	-1.31473	0
ENSMUSG00000041415.10	Dicer1	2978.97	-0.394358	0.185547	0.0147847	0.0839836	-1.31436	0
ENSMUSG00000070003.7	Ssbp4	1382.96	0.485104	0.24723	0.014779	0.0839836	1.39969	0
ENSMUSG00000018841.17	Rad51d	363.178	-0.423651	0.20459	0.0148099	0.0840593	-1.34132	0
ENSMUSG00000052751.16	Repin1	476.469	-0.435546	0.212187	0.0148115	0.0840593	-1.35242	0
ENSMUSG00000105134.1	Gm42923	42.1741	0.719251	0.48921	0.0148167	0.0840609	1.64633	0
ENSMUSG00000003949.16	Hlf	521.213	-0.705235	0.470711	0.0148229	0.0840685	-1.63041	0
ENSMUSG00000106825.1	2510016D11Rik	57.2135	-0.68651	0.450128	0.0148313	0.084088	-1.60939	0
ENSMUSG00000007617.18	Homer1	421.901	0.677541	0.432228	0.0148437	0.0841305	1.59941	0
ENSMUSG00000030019.6	Fbxl14	663.002	-0.448881	0.221418	0.014883	0.0843256	-1.36498	0
ENSMUSG00000034460.9	Six4	755.644	-0.523482	0.277826	0.014897	0.084377	-1.43742	0
ENSMUSG00000103715.1	4933431K14Rik	123.785	-0.502168	0.260581	0.0149068	0.0844045	-1.41634	0
ENSMUSG00000040048.14	Ndufb10	1547.68	0.370722	0.171713	0.014923	0.0844683	1.293	0
ENSMUSG00000021271.5	Zfp839	311.097	-0.407213	0.194346	0.0149566	0.0846183	-1.32612	0
ENSMUSG00000022780.5	Meltf	65.6837	0.682389	0.441094	0.0149593	0.0846183	1.60479	0
ENSMUSG00000021775.11	Nr1d2	4540.94	-0.627104	0.377402	0.0149765	0.0846872	-1.54446	0
ENSMUSG00000027808.8	Serp1	8159.49	-0.440889	0.216437	0.0150132	0.0848668	-1.35744	0
ENSMUSG00000000563.17	Atp5pb	3868.77	0.356578	0.163642	0.0150216	0.0848864	1.28039	0
ENSMUSG00000039037.5	St6galnac5	480.311	-0.474512	0.239981	0.0150394	0.084959	-1.38945	0
ENSMUSG00000003299.10	Mrpl4	792.436	0.423261	0.204414	0.0150664	0.0850833	1.34095	0
ENSMUSG00000047631.4	Apof	19.0712	-0.84901	0.991616	0.0150987	0.0852377	-1.80126	0
ENSMUSG00000043251.6	Exoc3l	74.4464	0.601127	0.34982	0.0151287	0.0853792	1.5169	0
ENSMUSG00000035095.11	Fam167a	378.83	-0.541726	0.294605	0.0151623	0.0855406	-1.45571	0
ENSMUSG00000032059.13	Alg9	500.344	0.378319	0.176725	0.0152035	0.0857447	1.29983	0
ENSMUSG00000022139.17	Mbnl2	3793.14	-0.414236	0.199652	0.015266	0.0860688	-1.33259	0
ENSMUSG00000028207.18	Asph	1409.07	0.498241	0.257101	0.0152838	0.0861408	1.41249	0
ENSMUSG00000050730.17	Arhgap42	85.2075	0.601609	0.352226	0.0152997	0.0862025	1.51741	0
ENSMUSG00000040365.14	Trim41	1588.52	-0.353416	0.160251	0.0153114	0.0862398	-1.27758	0
ENSMUSG00000025969.15	Nrp2	411.943	0.57789	0.326996	0.0153222	0.0862598	1.49266	0
ENSMUSG00000035011.15	Zbtb7a	1704.63	-0.4756	0.242606	0.015325	0.0862598	-1.3905	0
ENSMUSG00000033715.15	Akr1c14	2001.91	0.446513	0.223973	0.0153313	0.0862667	1.36274	0
ENSMUSG00000032932.15	Hspa13	2399.23	-0.447815	0.22363	0.0153404	0.0862896	-1.36397	0
ENSMUSG00000022044.14	Stmn4	28.5019	0.776343	0.594038	0.0153675	0.0864137	1.71278	0
ENSMUSG00000029860.16	Zyx	542.01	0.714422	0.493742	0.015379	0.0864499	1.64083	0
ENSMUSG00000071708.11	Sms	589.482	0.404776	0.193501	0.015396	0.0865172	1.32388	0
ENSMUSG00000074797.11	Itpa	739.482	0.443164	0.218785	0.0154044	0.0865363	1.35958	0
ENSMUSG00000006611.15	Hfe	436.252	0.428241	0.208956	0.0154422	0.0866066	1.34559	0
ENSMUSG00000025189.9	Cnnm1	168.193	0.47915	0.244449	0.0154315	0.0866066	1.39392	0
ENSMUSG00000026417.13	Pigr	158.347	-0.629167	0.382598	0.0154349	0.0866066	-1.54667	0
ENSMUSG00000035284.10	Vps13c	1995.08	-0.351129	0.161512	0.0154395	0.0866066	-1.27556	0
ENSMUSG00000037653.7	Kctd8	206.075	0.520027	0.27634	0.0154366	0.0866066	1.43398	0
ENSMUSG00000092329.1	Gm20388	954.806	-0.483769	0.250094	0.0154507	0.0866262	-1.39839	0
ENSMUSG00000109262.1	Gm44744	13.9243	-0.816265	1.20045	0.0154676	0.0866923	-1.76084	0
ENSMUSG00000005447.12	Pafah1b3	393.018	0.49178	0.254449	0.0154799	0.086733	1.40618	0
ENSMUSG00000035954.10	Dock4	166.61	0.462802	0.232663	0.0154861	0.0867393	1.37822	0
ENSMUSG00000091329.2	1700112D23Rik	9.15317	0.715	1.37377	0.0154943	0.0867572	1.64148	0
ENSMUSG00000041995.8	Zbed3	397.566	-0.419462	0.203771	0.0155014	0.0867681	-1.33743	0
ENSMUSG00000016477.18	E2f3	172.066	0.528348	0.283639	0.0155136	0.0868037	1.44228	0
ENSMUSG00000021277.16	Traf3	1293.02	-0.337823	0.154222	0.0155178	0.0868037	-1.26385	0
ENSMUSG00000021669.15	Col4a3bp	2371.36	-0.413269	0.199748	0.015557	0.0869945	-1.3317	0
ENSMUSG00000026553.17	Copa	12489.9	-0.337974	0.154585	0.015567	0.0870094	-1.26398	0
ENSMUSG00000027792.11	Bche	68.1656	0.811023	0.762868	0.0155698	0.0870094	1.75446	0
ENSMUSG00000053110.13	Yap1	165.339	0.503129	0.263288	0.0155791	0.0870325	1.41728	0
ENSMUSG00000053565.10	Eif3k	1655.82	0.359987	0.166922	0.0155964	0.0871011	1.28341	0
ENSMUSG00000042804.13	Gpr153	91.4309	0.636755	0.390262	0.0156278	0.0872481	1.55483	0
ENSMUSG00000029455.14	Aldh2	997.634	-0.411585	0.19908	0.0156585	0.0873626	-1.33015	0
ENSMUSG00000034259.8	Exosc4	475.755	0.444896	0.220842	0.0156542	0.0873626	1.36122	0
ENSMUSG00000042111.9	Ccdc115	666.652	0.446617	0.222162	0.0156781	0.0874433	1.36284	0
ENSMUSG00000033383.6	Rtp1	164.526	0.700774	0.477462	0.015703	0.0875537	1.62538	0
ENSMUSG00000020253.15	Ppm1m	101.162	-0.529646	0.287275	0.0157167	0.0875751	-1.44357	0
ENSMUSG00000027009.18	Itga4	107.578	0.557748	0.310603	0.015717	0.0875751	1.47197	0
ENSMUSG00000024925.11	Rnaseh2c	267.63	0.654763	0.416891	0.0157582	0.0877761	1.57436	0
ENSMUSG00000022756.17	Slc7a4	576.491	-0.385202	0.182662	0.0157651	0.087786	-1.30604	0
ENSMUSG00000044813.15	Shb	587.532	-0.426184	0.209078	0.0157883	0.0878864	-1.34368	0
ENSMUSG00000044452.10	Zfp507	698.101	-0.50024	0.263428	0.0157958	0.0878998	-1.41445	0
ENSMUSG00000022479.15	Vdr	4226.16	0.491097	0.255095	0.0158257	0.0880367	1.40551	0
ENSMUSG00000042207.17	Kdm5b	1457.2	-0.443306	0.22081	0.0158307	0.0880367	-1.35972	0
ENSMUSG00000097195.10	Snhg5	210.511	-0.5661	0.321166	0.0158507	0.0881193	-1.48052	0
ENSMUSG00000025371.12	Chmp6	436.414	0.451657	0.226343	0.0158641	0.0881653	1.36761	0
ENSMUSG00000073664.11	Nbeal1	1358.38	-0.378263	0.178607	0.0158741	0.0881923	-1.29978	0
ENSMUSG00000021803.10	Cdhr1	3031.24	0.3827	0.180611	0.0158953	0.0882325	1.30378	0
ENSMUSG00000025499.18	Hras	750.229	0.480759	0.247592	0.0158968	0.0882325	1.39548	0
ENSMUSG00000061808.4	Ttr	52702.9	0.437342	0.216102	0.0158941	0.0882325	1.35411	0
ENSMUSG00000033427.14	Upb1	1114.11	-0.42839	0.210952	0.0159054	0.0882518	-1.34573	0
ENSMUSG00000030880.14	Polr3e	612.523	0.451156	0.226116	0.0159168	0.0882578	1.36714	0
ENSMUSG00000100213.1	Gm28151	29.8307	-0.782491	0.65732	0.0159145	0.0882578	-1.7201	0
ENSMUSG00000026701.15	Prdx6	3641.23	0.350871	0.162223	0.0159498	0.0884124	1.27533	0
ENSMUSG00000037049.9	Smpd1	1966.23	0.404345	0.194613	0.0159655	0.0884709	1.32349	0
ENSMUSG00000017692.8	Rhbdl3	366.647	-0.381006	0.180439	0.0159719	0.0884776	-1.30225	0
ENSMUSG00000021585.10	Cast	825.696	0.386011	0.183138	0.0159861	0.0885275	1.30678	0
ENSMUSG00000028399.18	Ptprd	461.108	-0.415599	0.202507	0.0160289	0.0887362	-1.33385	0
ENSMUSG00000022843.17	Clcn2	278.446	0.464835	0.236454	0.016045	0.0887962	1.38016	0
ENSMUSG00000042436.12	Mfap4	158.059	0.564936	0.319294	0.0160666	0.0888874	1.47932	0
ENSMUSG00000040289.8	Hey1	107.573	0.616779	0.37237	0.0160889	0.0889814	1.53345	0
ENSMUSG00000069814.6	Ccdc92b	584.626	-0.425833	0.209006	0.0160992	0.0889814	-1.34335	0
ENSMUSG00000101609.2	Kcnq1ot1	970.928	-0.377681	0.178633	0.0160968	0.0889814	-1.29925	0
ENSMUSG00000024099.15	Ndufv2	2103.35	0.385858	0.183423	0.0161306	0.0891185	1.30664	0
ENSMUSG00000026727.10	Rsu1	644.384	0.42821	0.210838	0.0161344	0.0891185	1.34556	0
ENSMUSG00000032872.16	Cyb5r4	1010.08	0.343953	0.158692	0.0161559	0.0891799	1.26923	0
ENSMUSG00000117662.1	Gm4013	81.3721	-0.546348	0.304467	0.0161521	0.0891799	-1.46038	0
ENSMUSG00000044562.12	Rasip1	360.124	0.578786	0.333708	0.0161827	0.0892989	1.49359	0
ENSMUSG00000021033.11	Gstz1	4168.89	-0.347638	0.162461	0.0161898	0.0893096	-1.27248	0
ENSMUSG00000034248.7	Slc25a37	378.002	0.484333	0.251852	0.016196	0.0893152	1.39894	0
ENSMUSG00000020928.14	Higd1b	56.5094	0.59585	0.351364	0.0162159	0.0893958	1.51136	0
ENSMUSG00000028716.15	Pdzk1ip1	677.851	-0.431325	0.214234	0.0162343	0.0894685	-1.34847	0
ENSMUSG00000056973.6	Ces1d	60.8589	0.732827	0.545707	0.0162694	0.0896334	1.66189	0
ENSMUSG00000041035.9	Gm17018	485.041	0.376788	0.178278	0.0162858	0.089695	1.29845	0
ENSMUSG00000055485.6	Soga1	1239.44	-0.387391	0.185232	0.0163432	0.0899819	-1.30803	0
ENSMUSG00000021945.9	Zmym2	1749.53	-0.340664	0.157289	0.0163526	0.0900051	-1.26634	0
ENSMUSG00000038390.11	Gpr162	70.4429	-0.628899	0.389431	0.0163646	0.0900134	-1.54638	0
ENSMUSG00000118012.1	Gm46620	901.1	-0.416392	0.203891	0.0163629	0.0900134	-1.33459	0
ENSMUSG00000020723.3	Cacng4	200.35	-0.468085	0.240657	0.016414	0.0901531	-1.38327	0
ENSMUSG00000021680.8	Crhbp	8.75277	-0.445691	0.80748	0.0164091	0.0901531	-1.36197	0
ENSMUSG00000025135.12	Anapc11	981.513	0.430302	0.213151	0.0164163	0.0901531	1.34752	0
ENSMUSG00000028470.10	Hint2	485.005	0.460277	0.23442	0.0164049	0.0901531	1.37581	0
ENSMUSG00000112449.1	Srp54b	1680.75	-0.332096	0.153029	0.016411	0.0901531	-1.25884	0
ENSMUSG00000021760.5	Gpx8	85.0575	0.568303	0.32572	0.0164561	0.0902998	1.48278	0
ENSMUSG00000028455.15	Stoml2	719.589	0.405642	0.196821	0.0164501	0.0902998	1.32468	0
ENSMUSG00000117039.1	Gm32358	11.0219	-0.711693	1.28318	0.0164588	0.0902998	-1.63773	0
ENSMUSG00000021339.4	Mrs2	2169.76	0.371442	0.175215	0.0164663	0.0903116	1.29364	0
ENSMUSG00000032232.14	Cgnl1	176.726	0.562425	0.319611	0.0164814	0.0903655	1.47675	0
ENSMUSG00000000037.17	Scml2	77.1725	0.663906	0.437968	0.0164871	0.0903681	1.58437	0
ENSMUSG00000034088.15	Hdlbp	10648.7	-0.416085	0.204376	0.016494	0.0903768	-1.3343	0
ENSMUSG00000020672.14	Sntg2	28.9996	0.717678	0.517611	0.016532	0.0904984	1.64453	0
ENSMUSG00000036499.9	Eea1	1738.96	-0.374161	0.177287	0.0165293	0.0904984	-1.29609	0
ENSMUSG00000109916.1	Gm45551	74.56	-0.548294	0.307428	0.0165219	0.0904984	-1.46236	0
ENSMUSG00000069300.3	H2bc11	12.2276	0.8	1.09856	0.0165623	0.0906354	1.7411	0
ENSMUSG00000036620.14	Mgat4b	625.007	0.377812	0.1795	0.0165774	0.0906891	1.29937	0
ENSMUSG00000002603.15	Tgfb1	298.162	0.602643	0.362003	0.0166302	0.0909488	1.5185	0
ENSMUSG00000070565.11	Rasal2	672.192	0.423046	0.208736	0.016639	0.0909681	1.34076	0
ENSMUSG00000034522.10	Zfp395	892.271	-0.387173	0.186122	0.0166614	0.0910614	-1.30783	0
ENSMUSG00000054196.7	Cthrc1	40.3093	-0.756258	0.625832	0.0167025	0.0912568	-1.6891	0
ENSMUSG00000074862.11	BC025920	80.5818	0.644429	0.41497	0.0167395	0.0914297	1.56312	0
ENSMUSG00000022514.14	Il1rap	252.977	0.433737	0.216652	0.0167718	0.0915775	1.35073	0
ENSMUSG00000031807.10	Pgls	815.478	0.464317	0.237656	0.0167893	0.0916434	1.37966	0
ENSMUSG00000033676.13	Gabrb3	1167.02	-0.455282	0.232661	0.0168134	0.0917305	-1.37105	0
ENSMUSG00000037196.6	Pacrg	239.305	-0.403762	0.196866	0.0168176	0.0917305	-1.32295	0
ENSMUSG00000078572.3	Ndufaf8	273.592	0.471874	0.24468	0.0168213	0.0917305	1.38691	0
ENSMUSG00000025503.5	Taldo1	2122.99	0.480256	0.250548	0.016839	0.0917311	1.39499	0
ENSMUSG00000040532.14	Abhd11	290.584	0.499071	0.266089	0.01683	0.0917311	1.4133	0
ENSMUSG00000041623.17	D11Wsu47e	340.803	0.463649	0.238351	0.0168428	0.0917311	1.37903	0
ENSMUSG00000115190.1	Gm49542	536.378	-0.508672	0.27724	0.016842	0.0917311	-1.42274	0
ENSMUSG00000072852.4	2310040G07Rik	11.5662	-0.809702	1.0539	0.0168848	0.0919306	-1.75285	0
ENSMUSG00000037161.14	Mgarp	11.0163	-0.625838	1.16255	0.016915	0.0920658	-1.54311	0
ENSMUSG00000044456.16	Rin3	90.5895	0.571543	0.330974	0.0169223	0.0920762	1.48611	0
ENSMUSG00000117466.1	Gm50039	10.2007	-0.677467	1.29469	0.0169371	0.0921276	-1.59933	0
ENSMUSG00000031157.10	Pqbp1	770.71	0.339379	0.157305	0.0169448	0.0921406	1.26521	0
ENSMUSG00000038991.17	Txndc5	3509.63	-0.415174	0.204938	0.0169596	0.0921918	-1.33346	0
ENSMUSG00000061024.8	Rrs1	365.855	0.395055	0.191688	0.01698	0.0922733	1.31499	0
ENSMUSG00000026605.14	Cenpf	773.217	-0.664222	0.449792	0.0170108	0.0924114	-1.58471	0
ENSMUSG00000022793.17	B4galt4	405.683	0.478702	0.250418	0.0170253	0.0924609	1.39349	0
ENSMUSG00000006127.9	Inpp5k	906.015	0.428484	0.213613	0.0170368	0.0924938	1.34582	0
ENSMUSG00000002847.7	Pla1a	73.7968	0.597928	0.36245	0.0170426	0.0924963	1.51354	0
ENSMUSG00000051306.7	Usp42	535.525	-0.453112	0.231652	0.0170641	0.0925835	-1.36899	0
ENSMUSG00000025648.18	Pfkfb4	106.643	-0.545077	0.308007	0.0170789	0.0926205	-1.4591	0
ENSMUSG00000029925.13	Tbxas1	16.1553	0.793625	0.790975	0.017082	0.0926205	1.73343	0
ENSMUSG00000050271.12	Prag1	89.066	0.590894	0.351942	0.0170911	0.0926205	1.50618	0
ENSMUSG00000052430.15	Bmpr1b	14.9841	-0.689232	1.21059	0.0170925	0.0926205	-1.61243	0
ENSMUSG00000070934.6	Rraga	2310.73	0.323738	0.148853	0.0171122	0.0926979	1.25157	0
ENSMUSG00000025716.14	Myo3a	23.113	-0.752237	0.993037	0.0171338	0.0927857	-1.6844	0
ENSMUSG00000033615.9	Cplx1	137.41	0.695249	0.495079	0.017159	0.0928926	1.61916	0
ENSMUSG00000021903.11	Galnt15	175.993	0.621418	0.388392	0.0171667	0.0929052	1.53839	0
ENSMUSG00000062647.16	Rpl7a	8794.38	0.387282	0.186688	0.017178	0.0929369	1.30793	0
ENSMUSG00000005054.7	Cstb	931.109	0.454793	0.232973	0.0172067	0.0930625	1.37059	0
ENSMUSG00000036304.14	Zdhhc23	294.845	-0.42085	0.209377	0.0172208	0.0931098	-1.33872	0
ENSMUSG00000040860.16	Crocc	1153.45	-0.479451	0.255367	0.0172319	0.0931405	-1.39421	0
ENSMUSG00000000093.6	Tbx2	246.536	0.616984	0.384197	0.0172403	0.0931564	1.53367	0
ENSMUSG00000029714.11	Gigyf1	1062.72	-0.411954	0.203718	0.0172733	0.0932758	-1.33049	0
ENSMUSG00000031355.16	Arhgap6	236.392	0.443979	0.225054	0.0172732	0.0932758	1.36035	0
ENSMUSG00000070372.11	Capza1	1212.71	0.371802	0.177345	0.0172904	0.0933387	1.29397	0
ENSMUSG00000032377.8	Plscr4	228.156	-0.509673	0.277671	0.0173177	0.0934568	-1.42373	0
ENSMUSG00000066705.7	Fxyd6	4743.68	-0.368386	0.175852	0.0173422	0.0935594	-1.29091	0
ENSMUSG00000019863.7	Qrsl1	199.778	0.550537	0.314299	0.0173639	0.0936473	1.46463	0
ENSMUSG00000004100.12	Ppan	541.033	0.390358	0.189308	0.0174114	0.0938143	1.31072	0
ENSMUSG00000022652.7	Morc1	11.7116	0.460999	0.836937	0.0174046	0.0938143	1.37649	0
ENSMUSG00000048307.8	Ankrd46	1087.65	0.337236	0.157141	0.0174085	0.0938143	1.26333	0
ENSMUSG00000055980.2	Irs1	373.45	-0.43589	0.22045	0.0174168	0.0938143	-1.35275	0
ENSMUSG00000019054.13	Fis1	1732.84	0.360788	0.170949	0.0174659	0.0940491	1.28413	0
ENSMUSG00000001305.5	Rrp15	198.994	0.488365	0.259755	0.0175333	0.0943034	1.40285	0
ENSMUSG00000020364.14	Zfp354a	126.063	-0.531744	0.2989	0.0175254	0.0943034	-1.44568	0
ENSMUSG00000032643.12	Fhl3	19.31	0.793545	0.854083	0.0175351	0.0943034	1.73333	0
ENSMUSG00000040721.9	Zfhx2	2783.92	-0.360183	0.171308	0.0175323	0.0943034	-1.28359	0
ENSMUSG00000018565.17	Elp5	643.043	0.383968	0.18568	0.0176059	0.0946546	1.30493	0
ENSMUSG00000040560.10	Wdr7	1553.26	-0.387095	0.188088	0.0176469	0.0947858	-1.30776	0
ENSMUSG00000041132.11	N4bp2l1	536.786	-0.495917	0.268248	0.0176365	0.0947858	-1.41022	0
ENSMUSG00000087675.1	Gm11762	16.5007	-0.779119	0.74502	0.0176454	0.0947858	-1.71608	0
ENSMUSG00000021662.11	Arhgef28	992.813	-0.370552	0.178232	0.0176635	0.0948451	-1.29285	0
ENSMUSG00000002108.10	Nr1h3	114.199	-0.554635	0.320621	0.0177172	0.0951038	-1.4688	0
ENSMUSG00000000743.9	Chmp1a	2033.88	0.328222	0.15256	0.0177626	0.0952606	1.25546	0
ENSMUSG00000022620.14	Arsa	849.806	-0.351128	0.16617	0.0177549	0.0952606	-1.27556	0
ENSMUSG00000043668.13	Tox3	1517.5	-0.375677	0.181215	0.0177631	0.0952606	-1.29745	0
ENSMUSG00000023011.8	Faim2	61.101	0.718789	0.560321	0.0177709	0.0952728	1.6458	0
ENSMUSG00000020646.17	Mboat2	2036.18	-0.366004	0.175233	0.0177843	0.0952851	-1.28878	0
ENSMUSG00000021367.8	Edn1	15.2969	0.781224	0.984713	0.0177829	0.0952851	1.71859	0
ENSMUSG00000025404.15	R3hdm2	2559.27	-0.464912	0.243283	0.0177903	0.0952871	-1.38023	0
ENSMUSG00000020895.14	Tmem107	598.448	-0.436029	0.222007	0.0178416	0.0955321	-1.35288	0
ENSMUSG00000029433.16	Diablo	1111.87	0.335746	0.156956	0.0178471	0.0955321	1.26203	0
ENSMUSG00000062372.13	Otof	99.9313	-0.654289	0.444722	0.0178555	0.0955352	-1.57384	0
ENSMUSG00000069581.12	Tspear	7.93058	-0.350074	0.619909	0.0178589	0.0955352	-1.27463	0
ENSMUSG00000014164.15	Klhl3	163.48	-0.451743	0.233395	0.0178978	0.0956412	-1.36769	0
ENSMUSG00000022792.16	Yars2	242.107	0.515458	0.284936	0.0179121	0.0956412	1.42945	0
ENSMUSG00000026989.5	Dapl1	1813.03	0.561972	1.05237	0.0178959	0.0956412	1.47629	0
ENSMUSG00000038039.13	Gcc2	1794.98	-0.375097	0.181085	0.0179022	0.0956412	-1.29693	0
ENSMUSG00000041515.10	Irf8	120.777	0.740872	0.627696	0.0179102	0.0956412	1.67119	0
ENSMUSG00000052056.14	Zfp217	363.693	-0.542836	0.31166	0.017908	0.0956412	-1.45683	0
ENSMUSG00000034930.16	Rtkn	105.508	-0.598885	0.373018	0.0179347	0.0957317	-1.51455	0
ENSMUSG00000042660.8	Wdr55	231.066	0.430892	0.21801	0.0179412	0.0957365	1.34807	0
ENSMUSG00000005034.15	Prkacb	12669.4	-0.465501	0.240029	0.017948	0.0957434	-1.3808	0
ENSMUSG00000023169.15	Slc38a1	46.5863	0.622531	0.395049	0.0179538	0.0957445	1.53957	0
ENSMUSG00000030134.11	Rasgef1a	60.3572	-0.609119	0.382173	0.0180062	0.095964	-1.52533	0
ENSMUSG00000045917.17	Tmem268	216.587	-0.528452	0.297644	0.0180059	0.095964	-1.44238	0
ENSMUSG00000085995.2	Gm2788	17.7432	-0.756726	0.672034	0.0180161	0.0959871	-1.68965	0
ENSMUSG00000028354.13	Fmn2	2368.53	-0.503552	0.27668	0.018037	0.0960385	-1.4177	0
ENSMUSG00000087171.1	Gm12962	12.9481	-0.541172	0.977615	0.0180349	0.0960385	-1.45515	0
ENSMUSG00000117042.1	2700054A10Rik	43.6414	-0.627499	0.405176	0.018048	0.0960676	-1.54488	0
ENSMUSG00000024160.16	Spsb3	601.959	0.425581	0.2146	0.0180732	0.0961715	1.34311	0
ENSMUSG00000000627.15	Sema4f	127.101	-0.521531	0.291464	0.0181333	0.0964615	-1.43548	0
ENSMUSG00000020902.12	Ntn1	87.7664	0.643581	0.428437	0.0181622	0.0965551	1.5622	0
ENSMUSG00000027472.14	Pdrg1	812.637	0.383739	0.186846	0.0181573	0.0965551	1.30472	0
ENSMUSG00000028053.13	Ash1l	3137.94	-0.305936	0.141121	0.0181973	0.0967118	-1.23622	0
ENSMUSG00000064090.14	Vrk2	135.131	0.581441	0.353094	0.018218	0.0967919	1.49634	0
ENSMUSG00000023104.9	Rfc2	848.772	0.428858	0.217352	0.0182329	0.0968409	1.34617	0
ENSMUSG00000020914.17	Top2a	1957.96	-0.578627	0.351402	0.0182477	0.0968895	-1.49343	0
ENSMUSG00000058603.10	Rpl28-ps1	2387.74	0.322692	0.150229	0.0182737	0.0969975	1.25066	0
ENSMUSG00000053838.14	Nudcd3	2199.3	0.329185	0.153802	0.0182903	0.0970559	1.2563	0
ENSMUSG00000029387.10	Gtf2h3	530.148	0.44436	0.228836	0.0183098	0.0971	1.36071	0
ENSMUSG00000030707.15	Coro1a	130.738	0.582791	0.353832	0.0183156	0.0971	1.49774	0
ENSMUSG00000075054.5	Yae1d1	546.227	0.40714	0.202563	0.0183154	0.0971	1.32605	0
ENSMUSG00000038482.11	Tfdp1	1204.14	-0.423923	0.214942	0.018341	0.0972044	-1.34157	0
ENSMUSG00000014301.13	Pam16	200.01	0.592126	0.36557	0.0183735	0.0973466	1.50747	0
ENSMUSG00000021901.10	Bap1	1753.64	0.310703	0.14393	0.018385	0.0973682	1.24031	0
ENSMUSG00000047735.14	Samd9l	642.612	0.369141	0.178127	0.0183889	0.0973682	1.29158	0
ENSMUSG00000025477.14	Inpp5a	1487.2	0.342824	0.162046	0.0183986	0.0973892	1.26824	0
ENSMUSG00000022536.14	Glyr1	4055.97	0.300106	0.138254	0.0184237	0.0974921	1.23124	0
ENSMUSG00000022751.9	Nit2	190.407	0.525177	0.296593	0.0184458	0.0975787	1.43911	0
ENSMUSG00000044641.7	Pard6b	218.128	-0.456254	0.239192	0.0184727	0.0976909	-1.37198	0
ENSMUSG00000027612.7	Mmp24	466.9	0.369645	0.178687	0.0185343	0.0979299	1.29203	0
ENSMUSG00000030410.16	Dmwd	1027.94	0.341571	0.161602	0.0185278	0.0979299	1.26714	0
ENSMUSG00000097561.1	4632411P08Rik	22.6937	-0.743487	0.657665	0.018535	0.0979299	-1.67422	0
ENSMUSG00000079478.9	Znrd2	160.762	0.52759	0.299185	0.0185542	0.0980011	1.44152	0
ENSMUSG00000055723.6	Rras2	327.882	0.464008	0.244292	0.0185614	0.0980091	1.37937	0
ENSMUSG00000026047.13	Poglut2	328.115	0.515288	0.288297	0.0185866	0.0980966	1.42928	0
ENSMUSG00000060487.7	Samd5	122.302	-0.643821	0.43547	0.0185894	0.0980966	-1.56246	0
ENSMUSG00000028420.13	Tmem38b	242.194	0.447663	0.232514	0.0186271	0.0982652	1.36383	0
ENSMUSG00000010376.15	Nedd8	1314.29	0.403482	0.200808	0.0186531	0.0983259	1.3227	0
ENSMUSG00000024533.17	Spire1	767.946	-0.370183	0.179523	0.0186474	0.0983259	-1.29252	0
ENSMUSG00000042712.10	Tceal9	9277.04	-0.324287	0.152184	0.0186558	0.0983259	-1.25205	0
ENSMUSG00000028772.19	Zcchc17	655.732	0.362816	0.174783	0.0186838	0.098443	1.28593	0
ENSMUSG00000002332.16	Dhrs1	620.865	0.374612	0.182069	0.0186942	0.0984674	1.29649	0
ENSMUSG00000020577.17	Tspan13	4280.3	-0.386965	0.190397	0.0187069	0.098504	-1.30764	0
ENSMUSG00000026890.19	Lhx6	36.3243	0.728385	0.613828	0.0187429	0.0986634	1.65678	0
ENSMUSG00000013846.10	St3gal1	724.56	0.379867	0.185513	0.0187535	0.0986892	1.30122	0
ENSMUSG00000084842.3	Pabpc1l2b-ps	836.985	-0.450692	0.235549	0.0187732	0.0987321	-1.3667	0
ENSMUSG00000090266.10	Mettl23	358.333	0.39347	0.194518	0.0187713	0.0987321	1.31355	0
ENSMUSG00000073437.10	D330041H03Rik	54.5369	-0.63941	0.435313	0.0187845	0.0987466	-1.55769	0
ENSMUSG00000073491.11	Ifi213	17.6274	0.732373	0.923044	0.0187875	0.0987466	1.66137	0
ENSMUSG00000050708.16	Ftl1	18052.3	-0.385181	0.189495	0.0187967	0.098765	-1.30602	0
ENSMUSG00000000561.14	Wdr77	853.327	0.342648	0.162642	0.0188129	0.0988194	1.26808	0
ENSMUSG00000021764.8	Ndufs4	1087.05	0.379902	0.185726	0.0188246	0.0988508	1.30125	0
ENSMUSG00000028249.15	Sdcbp	5154.9	0.469841	0.249265	0.0188404	0.0989035	1.38496	0
ENSMUSG00000000805.18	Car4	66.136	0.707656	0.561495	0.0188509	0.0989282	1.63315	0
ENSMUSG00000037344.14	Slc12a9	401.27	-0.431707	0.221938	0.0188669	0.0989819	-1.34883	0
ENSMUSG00000028969.10	Cdk5	823.12	0.394516	0.195537	0.0189126	0.0991914	1.3145	0
ENSMUSG00000000359.3	Rem1	31.6357	0.75018	0.737431	0.0189228	0.0992144	1.682	0
ENSMUSG00000021076.6	Actr10	2169.92	0.330643	0.155858	0.0189323	0.0992282	1.25757	0
ENSMUSG00000023015.14	Racgap1	723.276	-0.509748	0.28541	0.018937	0.0992282	-1.4238	0
ENSMUSG00000018415.14	Gid4	764.622	-0.419765	0.213206	0.0189475	0.0992531	-1.33771	0
ENSMUSG00000027404.15	Snrpb	1730.2	0.401067	0.200043	0.0190345	0.0996782	1.32048	0
ENSMUSG00000024331.11	Dsc2	435.413	0.409857	0.206484	0.0191615	0.100252	1.32855	0
ENSMUSG00000025362.6	Rps26	3776.46	0.310098	0.144562	0.019159	0.100252	1.23979	0
ENSMUSG00000053716.9	Dusp7	373.975	-0.484394	0.264215	0.01915	0.100252	-1.399	0
ENSMUSG00000030805.14	Stx4a	755.697	0.334723	0.158632	0.019173	0.100281	1.26114	0
ENSMUSG00000024747.3	Aldh1a7	16.0678	0.752891	0.902415	0.019198	0.100381	1.68517	0
ENSMUSG00000006356.10	Crip2	716.114	0.497599	0.274615	0.0192142	0.100435	1.41186	0
ENSMUSG00000019235.9	Rps6kl1	154.415	-0.448034	0.235141	0.0192375	0.100486	-1.36418	0
ENSMUSG00000026546.16	Cfap45	33.6305	-0.699833	0.551266	0.0192415	0.100486	-1.62432	0
ENSMUSG00000028647.13	Mycbp	412.399	0.453307	0.238737	0.0192338	0.100486	1.36917	0
ENSMUSG00000091387.2	Gcnt4	174.592	-0.512304	0.288448	0.0192518	0.100509	-1.42633	0
ENSMUSG00000022604.18	Cep97	445.473	0.461797	0.245399	0.0192601	0.100522	1.37726	0
ENSMUSG00000054000.5	Tusc1	125.555	0.543676	0.318394	0.0192721	0.100554	1.45768	0
ENSMUSG00000036022.15	Fam122b	275.867	0.473885	0.254606	0.0192847	0.100589	1.38884	0
ENSMUSG00000049866.12	Arl4c	300.83	-0.56614	0.343693	0.0193175	0.10073	-1.48056	0
ENSMUSG00000037204.7	Atg101	371.97	0.380378	0.187033	0.0193272	0.100749	1.30168	0
ENSMUSG00000026077.15	Npas2	11.973	0.501208	0.873548	0.0193583	0.100881	1.4154	0
ENSMUSG00000038844.10	Kif16b	871.874	-0.410601	0.207927	0.0193688	0.100885	-1.32924	0
ENSMUSG00000072214.7	2021-09-05	1290.3	-0.428064	0.221718	0.0193709	0.100885	-1.34543	0
ENSMUSG00000041609.16	Bicdl1	737.641	0.344134	0.165151	0.0193776	0.100889	1.26939	0
ENSMUSG00000024012.18	Mtch1	5488.3	-0.319456	0.150375	0.0193858	0.100898	-1.24786	0
ENSMUSG00000036617.17	Etl4	1791.07	-0.415334	0.211388	0.0193911	0.100898	-1.33361	0
ENSMUSG00000029661.16	Col1a2	2037.51	0.562715	0.343196	0.0194172	0.101004	1.47705	0
ENSMUSG00000032596.14	Uba7	263.935	-0.50545	0.284185	0.0194572	0.101181	-1.41957	0
ENSMUSG00000018574.14	Acadvl	1594.08	0.343899	0.16467	0.0194759	0.101248	1.26918	0
ENSMUSG00000044350.14	Lacc1	177.307	0.429044	0.221058	0.019491	0.101265	1.34634	0
ENSMUSG00000075602.10	Ly6a	576.405	0.383124	0.189267	0.0194883	0.101265	1.30416	0
ENSMUSG00000024181.9	Mrpl28	729.385	0.468968	0.251451	0.0195157	0.101362	1.38412	0
ENSMUSG00000047409.13	Ctdspl	1994.42	-0.346115	0.166355	0.0195372	0.101443	-1.27113	0
ENSMUSG00000039018.15	Mtg1	440.358	0.473637	0.256025	0.0195548	0.101473	1.38861	0
ENSMUSG00000062995.12	Ica1	2042.46	-0.328169	0.156074	0.0195515	0.101473	-1.25542	0
ENSMUSG00000045733.7	Sprn	33.2129	0.714562	0.594079	0.0195634	0.101487	1.64098	0
ENSMUSG00000020741.17	Cluh	1286.28	0.366112	0.178576	0.0196383	0.101823	1.28887	0
ENSMUSG00000031434.15	Morc4	244.077	0.511713	0.288951	0.0196434	0.101823	1.42574	0
ENSMUSG00000097372.1	Gm26876	28.5393	-0.710028	0.602055	0.0196461	0.101823	-1.63584	0
ENSMUSG00000026873.9	Phf19	79.1704	-0.64523	0.456007	0.0196657	0.101894	-1.56399	0
ENSMUSG00000029462.18	Vps29	1555.82	0.412863	0.209932	0.0196861	0.101938	1.33132	0
ENSMUSG00000061186.15	Sfmbt2	12.5608	-0.515363	0.909536	0.0196807	0.101938	-1.42935	0
ENSMUSG00000022053.13	Ebf2	31.6895	0.716619	0.596765	0.019708	0.101993	1.64333	0
ENSMUSG00000052962.3	Mrpl35	317.996	0.407114	0.205895	0.0197086	0.101993	1.32603	0
ENSMUSG00000019173.11	Rab5c	2365.48	0.331252	0.157337	0.0197426	0.102139	1.2581	0
ENSMUSG00000039145.16	Camk1d	224.5	0.488438	0.268644	0.0197612	0.102204	1.40292	0
ENSMUSG00000022889.7	Mrpl39	530.4	0.403728	0.20394	0.0197801	0.10224	1.32292	0
ENSMUSG00000040659.3	Efhd2	870.351	0.348361	0.167883	0.0197749	0.10224	1.27311	0
ENSMUSG00000037331.15	Larp1	2685.25	-0.361505	0.176288	0.0198204	0.102417	-1.28477	0
ENSMUSG00000100235.8	Gm28557	55.1277	-0.63364	0.431251	0.0198297	0.102434	-1.55147	0
ENSMUSG00000053411.16	Cbx7	1439.54	-0.425087	0.21979	0.0198694	0.102609	-1.34265	0
ENSMUSG00000020949.9	Fkbp3	1043.17	0.354267	0.171699	0.0198849	0.102638	1.27834	0
ENSMUSG00000030772.6	Dkk3	249.88	0.657669	0.474821	0.019887	0.102638	1.57753	0
ENSMUSG00000007817.15	Zmiz1	2015.78	-0.426951	0.221251	0.01991	0.102725	-1.34439	0
ENSMUSG00000020846.6	Rflnb	730.114	0.437807	0.228546	0.0199254	0.102774	1.35454	0
ENSMUSG00000053950.10	Adnp2	568.027	-0.470824	0.255989	0.0199591	0.102917	-1.3859	0
ENSMUSG00000031781.14	Ciapin1	559.941	0.436641	0.228008	0.019972	0.102924	1.35345	0
ENSMUSG00000036264.9	Fstl4	19.0769	-0.737753	0.742631	0.0199725	0.102924	-1.66758	0
ENSMUSG00000025161.16	Slc16a3	36.3936	0.622363	1.02247	0.0200106	0.102969	1.53939	0
ENSMUSG00000032782.19	Cntrob	763.144	-0.460411	0.247545	0.0200082	0.102969	-1.37593	0
ENSMUSG00000039047.17	Pigk	1657.5	0.382148	0.18939	0.0200173	0.102969	1.30328	0
ENSMUSG00000046743.6	Fat4	241.824	0.480595	0.263075	0.0199957	0.102969	1.39532	0
ENSMUSG00000047242.14	Taf9b	1156.31	0.337482	0.161693	0.0200171	0.102969	1.26355	0
ENSMUSG00000079055.10	Slc8a3	22.1231	0.530079	0.918242	0.0199947	0.102969	1.44401	0
ENSMUSG00000022463.8	Srebf2	3312.78	-0.34394	0.166107	0.0200302	0.103005	-1.26922	0
ENSMUSG00000081309.3	Gm12397	64.3032	-0.0933667	0.379398	0.0200429	0.103039	-1.06686	0
ENSMUSG00000029610.13	Aimp2	271.848	0.481339	0.264283	0.0200791	0.103194	1.39604	0
ENSMUSG00000075588.6	Hoxb2	25.7862	0.734324	0.776547	0.0200946	0.103243	1.66362	0
ENSMUSG00000025157.8	Zdhhc16	425.772	0.529456	0.309008	0.0201233	0.103344	1.44338	0
ENSMUSG00000031584.16	Gsr	999.888	-0.368357	0.181469	0.0201323	0.103344	-1.29088	0
ENSMUSG00000052135.8	Foxo6	422.652	0.406476	0.206519	0.0201319	0.103344	1.32544	0
ENSMUSG00000039853.18	Trim14	116.012	-0.50123	0.284272	0.0201631	0.103471	-1.41542	0
ENSMUSG00000022437.7	Samm50	1548.45	0.332782	0.159144	0.0201953	0.103605	1.25944	0
ENSMUSG00000110713.1	Gm30606	52.9343	-0.572416	0.356396	0.0202286	0.103745	-1.48701	0
ENSMUSG00000037750.16	Fam222b	693.617	-0.425241	0.22072	0.0202586	0.103868	-1.3428	0
ENSMUSG00000029466.11	Anapc7	844.569	0.351571	0.170797	0.0203081	0.104063	1.27595	0
ENSMUSG00000057411.9	Fam173a	1107.64	0.353473	0.172007	0.0203089	0.104063	1.27763	0
ENSMUSG00000054452.10	Tle5	6238.66	-0.329148	0.15828	0.0203269	0.104124	-1.25627	0
ENSMUSG00000066621.12	Tecpr1	1257.1	0.369862	0.182452	0.0203774	0.104352	1.29223	0
ENSMUSG00000023088.17	Abcc1	565.832	-0.350563	0.17089	0.0204007	0.10444	-1.27506	0
ENSMUSG00000031347.12	Cetn2	1022.49	0.362046	0.177467	0.0204369	0.104563	1.28525	0
ENSMUSG00000033294.11	Noc4l	257.896	0.405777	0.206971	0.0204333	0.104563	1.3248	0
ENSMUSG00000041681.2	Iapp	324362	-0.432312	0.227028	0.0204532	0.104615	-1.34939	0
ENSMUSG00000004771.12	Rab11a	2744.2	0.299185	0.140116	0.0205126	0.104888	1.23045	0
ENSMUSG00000020430.12	Pes1	1049.56	0.392579	0.19788	0.020531	0.104888	1.31274	0
ENSMUSG00000033191.14	Tie1	1263.21	0.438099	0.230558	0.0205261	0.104888	1.35482	0
ENSMUSG00000033323.14	Ctdp1	770.871	0.429264	0.22387	0.0205302	0.104888	1.34655	0
ENSMUSG00000011148.14	Adssl1	52.1955	-0.615443	0.415968	0.0205591	0.104999	-1.53203	0
ENSMUSG00000031493.10	Ggn	31.086	-0.688653	0.86905	0.0205649	0.104999	-1.61178	0
ENSMUSG00000001999.15	Blvra	214.693	0.430997	0.225551	0.0205752	0.10502	1.34816	0
ENSMUSG00000030432.12	Rpl28	2919.47	0.289766	0.134019	0.0205999	0.105052	1.22244	0
ENSMUSG00000042631.7	Xkr7	372.137	0.376596	0.187275	0.0205998	0.105052	1.29828	0
ENSMUSG00000043384.15	Gprasp1	5061.64	-0.379762	0.189917	0.0205994	0.105052	-1.30113	0
ENSMUSG00000021629.10	Slc30a5	1918.83	-0.36443	0.179786	0.0206168	0.105098	-1.28737	0
ENSMUSG00000026035.15	Ppil3	227.21	0.444928	0.236389	0.0206212	0.105098	1.36125	0
ENSMUSG00000021759.14	Plpp1	1062.66	0.399655	0.202872	0.0206494	0.105148	1.31919	0
ENSMUSG00000032171.7	Pin1	1175.19	0.459325	0.248926	0.0206388	0.105148	1.3749	0
ENSMUSG00000078861.8	Zfp931	278.946	0.399283	0.202667	0.0206446	0.105148	1.31885	0
ENSMUSG00000023967.9	Mrps18a	611.166	0.392837	0.198349	0.0206654	0.105176	1.31297	0
ENSMUSG00000029368.10	Alb	45.6538	0.683256	0.541032	0.0206856	0.105176	1.60576	0
ENSMUSG00000029725.10	Ppp1r35	245.763	0.55172	0.335482	0.0206701	0.105176	1.46583	0
ENSMUSG00000032350.9	Gclc	692.32	0.323804	0.154659	0.0206855	0.105176	1.25163	0
ENSMUSG00000097848.2	Gm807	28.2003	0.707805	0.856923	0.0206754	0.105176	1.63332	0
ENSMUSG00000041720.14	Pi4ka	3241.7	-0.356079	0.17448	0.0207019	0.105228	-1.27994	0
ENSMUSG00000020527.14	Myo19	153.397	0.553711	0.3386	0.0207421	0.10537	1.46786	0
ENSMUSG00000027424.11	Mgme1	175.364	0.544076	0.327561	0.0207417	0.10537	1.45809	0
ENSMUSG00000026032.8	Ndufb3	1065.47	0.341267	0.165192	0.0207679	0.105469	1.26687	0
ENSMUSG00000028010.16	Gar1	266.257	0.418064	0.216278	0.0208215	0.105711	1.33613	0
ENSMUSG00000071573.14	Rnls	93.8926	-0.513979	0.29876	0.0208323	0.105734	-1.42798	0
ENSMUSG00000098234.7	Snhg6	170.082	0.523967	0.307398	0.020886	0.105975	1.4379	0
ENSMUSG00000100017.2	2410022M11Rik	120.702	-0.492578	0.27851	0.0209794	0.106418	-1.40696	0
ENSMUSG00000005220.10	Corin	82.8027	-0.569592	0.358652	0.0209996	0.106464	-1.4841	0
ENSMUSG00000017686.17	Rhot1	1360.7	0.328236	0.157791	0.0210071	0.106464	1.25548	0
ENSMUSG00000038279.10	Nop2	514.046	0.463169	0.252104	0.0210054	0.106464	1.37857	0
ENSMUSG00000051154.11	Commd3	868.792	0.35286	0.172858	0.0210166	0.10648	1.27709	0
ENSMUSG00000045680.8	Tcf21	28.4536	0.677134	0.53361	0.0210273	0.106503	1.59896	0
ENSMUSG00000079259.2	Trim71	34.1288	-0.648158	0.478664	0.0210378	0.106525	-1.56717	0
ENSMUSG00000036246.14	Gmip	237.783	-0.579085	0.375536	0.0210769	0.106691	-1.4939	0
ENSMUSG00000019920.18	Lims1	1254.11	0.342475	0.16647	0.0210878	0.106715	1.26793	0
ENSMUSG00000021752.13	Kctd6	256.461	-0.393092	0.199825	0.021112	0.106806	-1.3132	0
ENSMUSG00000066057.7	Gm1976	78.2976	0.547021	0.332855	0.0211338	0.106885	1.46107	0
ENSMUSG00000087593.1	Gm16174	84.8952	-0.587994	0.386917	0.0211767	0.10707	-1.50316	0
ENSMUSG00000022758.14	P2rx6	9.4337	-0.300473	0.542548	0.0211993	0.107135	-1.23155	0
ENSMUSG00000027803.14	Wwtr1	482.594	0.564658	0.352835	0.0212019	0.107135	1.47904	0
ENSMUSG00000015289.4	Lage3	446.768	0.425855	0.223515	0.0212258	0.107221	1.34337	0
ENSMUSG00000019433.9	Gipc1	620.957	0.424713	0.222538	0.0212316	0.107221	1.34231	0
ENSMUSG00000040888.10	Gfer	292.251	0.449259	0.241564	0.0212392	0.107228	1.36534	0
ENSMUSG00000058392.13	Rrp1b	442.12	0.431487	0.228034	0.0212515	0.107258	1.34862	0
ENSMUSG00000041530.16	Ago1	1542.75	-0.338429	0.159139	0.0212623	0.107281	-1.26438	0
ENSMUSG00000045176.3	Borcs6	303.823	0.393467	0.200021	0.0212779	0.107329	1.31355	0
ENSMUSG00000020514.8	Mrpl22	266.57	0.471101	0.260096	0.021299	0.107403	1.38617	0
ENSMUSG00000041360.8	Pum3	767.094	0.429935	0.226701	0.0213452	0.107604	1.34717	0
ENSMUSG00000026979.16	Psd4	324.9	-0.541651	0.330298	0.0213721	0.107709	-1.45564	0
ENSMUSG00000087370.3	Tmem170b	561.96	-0.497746	0.284789	0.0213901	0.107768	-1.41201	0
ENSMUSG00000024357.10	Sil1	1601.75	0.308496	0.146685	0.0214022	0.107797	1.23842	0
ENSMUSG00000043531.16	Sorcs1	103.85	-0.529292	0.316496	0.0214155	0.107832	-1.44322	0
ENSMUSG00000037754.13	Ppp1r16b	168.251	0.478246	0.266065	0.0214238	0.107842	1.39305	0
ENSMUSG00000050855.16	Zfp940	37.8206	-0.659187	0.510858	0.0214536	0.10796	-1.57919	0
ENSMUSG00000038068.15	Rnf144b	47.0113	0.616371	0.423126	0.0214622	0.107972	1.53301	0
ENSMUSG00000020474.11	Polm	246.534	-0.459221	0.25142	0.0214786	0.108023	-1.3748	0
ENSMUSG00000031342.17	Gpm6b	153.363	0.636035	0.460307	0.0215363	0.108281	1.55405	0
ENSMUSG00000030979.13	Uros	663.348	0.47316	0.262558	0.0215539	0.108338	1.38815	0
ENSMUSG00000027661.4	Slc2a10	40.4163	-0.640374	0.470967	0.021573	0.108402	-1.55873	0
ENSMUSG00000090363.8	Gm3512	47.9844	-0.612848	0.423733	0.0215935	0.108474	-1.52928	0
ENSMUSG00000030835.6	Nomo1	2418.58	0.391084	0.199161	0.021617	0.10856	1.31138	0
ENSMUSG00000006050.12	Sra1	1166.68	0.349653	0.171878	0.0216321	0.108604	1.27425	0
ENSMUSG00000028295.14	Smim8	318.403	0.378858	0.191685	0.021644	0.108632	1.30031	0
ENSMUSG00000005378.17	Bud23	468.702	0.478849	0.268118	0.0216791	0.108745	1.39363	0
ENSMUSG00000010755.17	Cars	898.94	-0.402188	0.207729	0.0216779	0.108745	-1.32151	0
ENSMUSG00000018428.15	Akap1	492.138	0.401954	0.207074	0.0217031	0.108833	1.3213	0
ENSMUSG00000109401.1	Cpeb1os1	65.7234	-0.618584	0.432276	0.021728	0.108926	-1.53537	0
ENSMUSG00000086700.2	Gm15747	7.41024	-0.291473	0.531495	0.0217364	0.108936	-1.22389	0
ENSMUSG00000001630.13	Stk38l	1232.87	0.405336	0.209443	0.0217627	0.109025	1.3244	0
ENSMUSG00000024515.13	Smad4	1625.56	-0.402944	0.208853	0.021791	0.109025	-1.3222	0
ENSMUSG00000030096.8	Slc6a6	6035.08	-0.379695	0.192112	0.0217734	0.109025	-1.30107	0
ENSMUSG00000035929.11	H2-Q4	791.036	-0.428328	0.226743	0.0217917	0.109025	-1.34567	0
ENSMUSG00000054676.15	1600014C10Rik	661.119	0.489219	0.277537	0.0217923	0.109025	1.40369	0
ENSMUSG00000113902.1	Ndufb1-ps	955.511	0.425604	0.224625	0.0217902	0.109025	1.34313	0
ENSMUSG00000031925.17	Maml2	244.868	0.522137	0.309283	0.0217995	0.109029	1.43608	0
ENSMUSG00000026156.8	B3gat2	13.7379	-0.340561	0.596326	0.0218587	0.109292	-1.26625	0
ENSMUSG00000034799.16	Unc13a	2336	0.41921	0.220487	0.0218648	0.109292	1.3372	0
ENSMUSG00000068335.6	Dok1	81.4032	-0.65422	0.522387	0.02192	0.109504	-1.57376	0
ENSMUSG00000096141.2	Dnah7a	9.64236	-0.189163	0.429011	0.0219201	0.109504	-1.1401	0
ENSMUSG00000037552.17	Plekhg2	293.046	0.453538	0.246538	0.0220046	0.109895	1.36939	0
ENSMUSG00000027804.13	Ppid	1123.6	0.396321	0.202863	0.0220486	0.110051	1.31615	0
ENSMUSG00000039987.15	Phtf2	198.443	0.482719	0.272266	0.0220439	0.110051	1.39737	0
ENSMUSG00000022774.13	Ncbp2	1355.21	0.314035	0.151055	0.0220729	0.11014	1.24318	0
ENSMUSG00000015013.9	Trappc2l	1007.54	0.366761	0.183677	0.0220998	0.110152	1.28945	0
ENSMUSG00000017404.12	Rpl19	11002.4	0.363623	0.181349	0.0221011	0.110152	1.28665	0
ENSMUSG00000033960.6	Jcad	426.523	0.418283	0.2197	0.0220943	0.110152	1.33634	0
ENSMUSG00000048578.11	Mlec	8756.61	-0.315603	0.151644	0.0220831	0.110152	-1.24453	0
[truncated: 13,705 more rows]
